# Supplementary material
Source: ML conference proceedings conference paper supplement (https://openreview.net/forum?id=Gl2nXRzclw)
Supplement: supplementary_material [file Energy_data_assymetric.xlsx]

## Sheet: Train
x_0	x_1	x_2	x_3	x_4	x_5	x_6	x_7	y
-1.1746	1.27562	0.561951	0.972512	-0.999999	-0.447213	-1.76043	-1.81457	-1.16696
0.24438	-0.394284	0.561951	-0.65588	0.999999	1.34164	0.117362	1.41134	1.62073
1.28497	-1.22924	0	-1.19868	0.999999	-1.34164	-1.00932	1.41134	0.746041
1.28497	-1.22924	0	-1.19868	0.999999	0.447213	1.24404	1.41134	5.32013
1.28497	-1.22924	0	-1.19868	0.999999	1.34164	-1.00932	-0.52421	0.554642
2.04176	-1.78587	-0.561951	-1.47008	0.999999	-0.447213	1.24404	1.41134	1.03264
-0.985404	0.997307	0	0.972512	-0.999999	-1.34164	1.24404	-0.52421	-0.690941
-0.701608	0.718989	-0.561951	0.972512	-0.999999	0.447213	-1.76043	-1.81457	-1.54083
0.528177	-0.672602	0	-0.65588	0.999999	-1.34164	-1.76043	-1.81457	7.39703
0.906572	-0.95092	-0.561951	-0.65588	0.999999	-0.447213	1.24404	0.766153	4.28215
0.24438	-0.394284	0.561951	-0.65588	0.999999	-0.447213	-1.00932	-0.52421	1.48288
0.24438	-0.394284	0.561951	-0.65588	0.999999	-0.447213	-1.00932	-1.16939	1.46899
0.24438	-0.394284	0.561951	-0.65588	0.999999	-0.447213	1.24404	0.120972	1.88353
-0.701608	0.718989	-0.561951	0.972512	-0.999999	0.447213	-1.00932	0.120972	2.9905
-1.1746	1.27562	0.561951	0.972512	-0.999999	-0.447213	0.117362	0.766153	-0.557061
0.528177	-0.672602	0	-0.65588	0.999999	1.34164	-1.00932	-0.52421	0.04788
-1.3638	1.55394	1.1239	0.972512	-0.999999	-1.34164	-1.00932	-0.52421	5.23236
-1.1746	1.27562	0.561951	0.972512	-0.999999	-1.34164	-1.00932	1.41134	-0.708792
2.04176	-1.78587	-0.561951	-1.47008	0.999999	-0.447213	0.117362	0.766153	0.619103
0.24438	-0.394284	0.561951	-0.65588	0.999999	1.34164	-1.00932	1.41134	1.30635
-0.228614	0.162352	-1.68585	0.972512	-0.999999	-1.34164	-1.00932	0.120972	-1.18184
-1.3638	1.55394	1.1239	0.972512	-0.999999	-0.447213	0.117362	-0.52421	-0.758377
2.04176	-1.78587	-0.561951	-1.47008	0.999999	-1.34164	1.24404	1.41134	1.04454
-0.701608	0.718989	-0.561951	0.972512	-0.999999	-1.34164	-1.00932	-1.16939	-1.11043
1.28497	-1.22924	0	-1.19868	0.999999	-1.34164	0.117362	-1.16939	1.02868
0.528177	-0.672602	0	-0.65588	0.999999	0.447213	-1.00932	-0.52421	0.13515
2.04176	-1.78587	-0.561951	-1.47008	0.999999	1.34164	1.24404	-0.52421	1.03264
-1.1746	1.27562	0.561951	0.972512	-0.999999	0.447213	1.24404	-1.16939	-0.280375
0.528177	-0.672602	0	-0.65588	0.999999	1.34164	1.24404	1.41134	7.88111
1.28497	-1.22924	0	-1.19868	0.999999	0.447213	-1.00932	1.41134	0.567534
-0.0394162	-0.115966	2.24781	-1.19868	0.999999	0.447213	0.117362	0.120972	1.32222
-0.985404	0.997307	0	0.972512	-0.999999	0.447213	1.24404	-0.52421	-0.715734
0.906572	-0.95092	-0.561951	-0.65588	0.999999	0.447213	-1.00932	0.766153	0.398944
0.906572	-0.95092	-0.561951	-0.65588	0.999999	0.447213	-1.76043	-1.81457	-0.294259
0.24438	-0.394284	0.561951	-0.65588	0.999999	0.447213	1.24404	0.120972	2.00154
1.28497	-1.22924	0	-1.19868	0.999999	-0.447213	1.24404	-1.16939	1.4809
0.528177	-0.672602	0	-0.65588	0.999999	1.34164	1.24404	0.120972	0.654804
1.28497	-1.22924	0	-1.19868	0.999999	-0.447213	0.117362	0.120972	1.00091
1.28497	-1.22924	0	-1.19868	0.999999	-0.447213	1.24404	-0.52421	1.41445
-0.51241	0.44067	-1.1239	0.972512	-0.999999	0.447213	1.24404	1.41134	7.42889
0.528177	-0.672602	0	-0.65588	0.999999	-0.447213	0.117362	1.41134	0.283906
1.28497	-1.22924	0	-1.19868	0.999999	-1.34164	-1.76043	-1.81457	-0.145503
0.906572	-0.95092	-0.561951	-0.65588	0.999999	-1.34164	0.117362	-1.16939	4.18178
-0.701608	0.718989	-0.561951	0.972512	-0.999999	0.447213	0.117362	1.41134	-1.00432
-0.985404	0.997307	0	0.972512	-0.999999	-0.447213	-1.00932	1.41134	-1.08762
-1.3638	1.55394	1.1239	0.972512	-0.999999	-1.34164	-1.00932	-1.16939	-0.926967
-0.228614	0.162352	-1.68585	0.972512	-0.999999	0.447213	-1.00932	-0.52421	-1.18878
-0.0394162	-0.115966	2.24781	-1.19868	0.999999	1.34164	0.117362	-1.16939	1.40057
0.24438	-0.394284	0.561951	-0.65588	0.999999	-1.34164	-1.00932	0.766153	1.44321
2.04176	-1.78587	-0.561951	-1.47008	0.999999	1.34164	0.117362	1.41134	0.625053
-1.3638	1.55394	1.1239	0.972512	-0.999999	1.34164	1.24404	1.41134	3.79094
-0.0394162	-0.115966	2.24781	-1.19868	0.999999	-0.447213	1.24404	0.120972	1.73874
0.906572	-0.95092	-0.561951	-0.65588	0.999999	-1.34164	-1.00932	0.766153	0.409853
-0.985404	0.997307	0	0.972512	-0.999999	1.34164	-1.00932	-1.16939	-1.05291
0.24438	-0.394284	0.561951	-0.65588	0.999999	-0.447213	1.24404	0.766153	1.92617
-0.228614	0.162352	-1.68585	0.972512	-0.999999	-1.34164	1.24404	-0.52421	-0.770277
2.04176	-1.78587	-0.561951	-1.47008	0.999999	1.34164	0.117362	-1.16939	6.59054
-0.228614	0.162352	-1.68585	0.972512	-0.999999	0.447213	1.24404	0.120972	-0.813912
-1.1746	1.27562	0.561951	0.972512	-0.999999	0.447213	0.117362	1.41134	-0.550119
0.528177	-0.672602	0	-0.65588	0.999999	0.447213	-1.00932	-1.16939	0.122258
0.906572	-0.95092	-0.561951	-0.65588	0.999999	-1.34164	0.117362	0.120972	0.604227
-1.3638	1.55394	1.1239	0.972512	-0.999999	-1.34164	0.117362	-0.52421	-0.790112
-0.701608	0.718989	-0.561951	0.972512	-0.999999	-1.34164	-1.00932	0.120972	-1.09952
-1.3638	1.55394	1.1239	0.972512	-0.999999	0.447213	1.24404	1.41134	-0.577886
-1.3638	1.55394	1.1239	0.972512	-0.999999	1.34164	-1.00932	-0.52421	4.16301
-0.701608	0.718989	-0.561951	0.972512	-0.999999	1.34164	-1.00932	-1.16939	-1.10547
-0.228614	0.162352	-1.68585	0.972512	-0.999999	-1.34164	0.117362	0.766153	-0.990436
0.528177	-0.672602	0	-0.65588	0.999999	-0.447213	1.24404	0.120972	0.730174
0.24438	-0.394284	0.561951	-0.65588	0.999999	-0.447213	1.24404	-1.16939	2.01443
-0.701608	0.718989	-0.561951	0.972512	-0.999999	0.447213	1.24404	0.766153	-0.771269
-0.228614	0.162352	-1.68585	0.972512	-0.999999	1.34164	0.117362	0.120972	-1.05291
-0.0394162	-0.115966	2.24781	-1.19868	0.999999	1.34164	-1.00932	1.41134	1.08719
-0.985404	0.997307	0	0.972512	-0.999999	-0.447213	-1.00932	0.120972	-1.06184
-0.51241	0.44067	-1.1239	0.972512	-0.999999	-0.447213	-1.00932	0.120972	-1.15308
-0.51241	0.44067	-1.1239	0.972512	-0.999999	-0.447213	1.24404	-0.52421	-0.758377
-0.985404	0.997307	0	0.972512	-0.999999	-0.447213	0.117362	0.766153	-0.923
-1.3638	1.55394	1.1239	0.972512	-0.999999	-1.34164	1.24404	0.766153	-0.581853
-1.3638	1.55394	1.1239	0.972512	-0.999999	1.34164	-1.00932	1.41134	-0.960685
0.906572	-0.95092	-0.561951	-0.65588	0.999999	-0.447213	0.117362	-1.16939	0.767859
-0.51241	0.44067	-1.1239	0.972512	-0.999999	-1.34164	1.24404	0.766153	-0.764327
2.04176	-1.78587	-0.561951	-1.47008	0.999999	-0.447213	-1.00932	0.766153	0.190686
-0.701608	0.718989	-0.561951	0.972512	-0.999999	1.34164	-1.00932	-0.52421	-1.07275
0.906572	-0.95092	-0.561951	-0.65588	0.999999	0.447213	1.24404	-0.52421	0.974133
0.528177	-0.672602	0	-0.65588	0.999999	-0.447213	-1.76043	-1.81457	-0.485658
-1.1746	1.27562	0.561951	0.972512	-0.999999	0.447213	-1.00932	0.120972	3.83312
-0.985404	0.997307	0	0.972512	-0.999999	-1.34164	-1.00932	0.766153	-1.07771
-0.701608	0.718989	-0.561951	0.972512	-0.999999	-0.447213	0.117362	-0.52421	3.82938
-1.1746	1.27562	0.561951	0.972512	-0.999999	1.34164	1.24404	0.120972	-0.381529
-1.3638	1.55394	1.1239	0.972512	-0.999999	0.447213	0.117362	-1.16939	-0.716725
0.906572	-0.95092	-0.561951	-0.65588	0.999999	-1.34164	1.24404	0.766153	0.998926
-0.51241	0.44067	-1.1239	0.972512	-0.999999	1.34164	0.117362	0.120972	5.56179
-0.0394162	-0.115966	2.24781	-1.19868	0.999999	-1.34164	1.24404	0.120972	1.68717
-0.228614	0.162352	-1.68585	0.972512	-0.999999	0.447213	-1.00932	0.766153	-1.21357
0.24438	-0.394284	0.561951	-0.65588	0.999999	0.447213	-1.00932	-0.52421	1.45412
-0.985404	0.997307	0	0.972512	-0.999999	0.447213	1.24404	1.41134	-0.732593
-1.3638	1.55394	1.1239	0.972512	-0.999999	-1.34164	0.117362	-1.16939	3.28305
0.528177	-0.672602	0	-0.65588	0.999999	0.447213	0.117362	-0.52421	0.304732
-0.985404	0.997307	0	0.972512	-0.999999	1.34164	0.117362	-0.52421	-0.923
-0.228614	0.162352	-1.68585	0.972512	-0.999999	1.34164	-1.00932	1.41134	-1.18184
0.906572	-0.95092	-0.561951	-0.65588	0.999999	-0.447213	-1.00932	1.41134	0.410844
0.528177	-0.672602	0	-0.65588	0.999999	-0.447213	0.117362	0.766153	0.26308
0.906572	-0.95092	-0.561951	-0.65588	0.999999	-1.34164	0.117362	-0.52421	0.697447
1.28497	-1.22924	0	-1.19868	0.999999	-0.447213	-1.00932	0.766153	0.569517
1.28497	-1.22924	0	-1.19868	0.999999	0.447213	0.117362	0.120972	1.02868
0.24438	-0.394284	0.561951	-0.65588	0.999999	0.447213	0.117362	0.766153	1.58899
2.04176	-1.78587	-0.561951	-1.47008	0.999999	0.447213	-1.00932	-1.16939	0.230354
-0.228614	0.162352	-1.68585	0.972512	-0.999999	-1.34164	1.24404	0.120972	-0.826805
-1.1746	1.27562	0.561951	0.972512	-0.999999	-1.34164	-1.00932	0.120972	-0.708792
-0.701608	0.718989	-0.561951	0.972512	-0.999999	-0.447213	0.117362	0.120972	-0.976552
2.04176	-1.78587	-0.561951	-1.47008	0.999999	0.447213	1.24404	-1.16939	1.00983
-0.228614	0.162352	-1.68585	0.972512	-0.999999	-0.447213	-1.76043	-1.81457	-1.61224
-0.985404	0.997307	0	0.972512	-0.999999	-0.447213	1.24404	-0.52421	-0.695899
1.28497	-1.22924	0	-1.19868	0.999999	-0.447213	1.24404	0.766153	1.33115
1.28497	-1.22924	0	-1.19868	0.999999	1.34164	1.24404	0.120972	1.18834
-1.3638	1.55394	1.1239	0.972512	-0.999999	-1.34164	-1.00932	0.766153	-0.937876
-0.0394162	-0.115966	2.24781	-1.19868	0.999999	1.34164	1.24404	1.41134	1.74072
1.28497	-1.22924	0	-1.19868	0.999999	-0.447213	-1.00932	0.120972	0.664721
1.28497	-1.22924	0	-1.19868	0.999999	-1.34164	1.24404	0.766153	1.40255
-1.1746	1.27562	0.561951	0.972512	-0.999999	-1.34164	-1.76043	-1.81457	-1.13622
0.906572	-0.95092	-0.561951	-0.65588	0.999999	-1.34164	-1.76043	-1.81457	2.72927
-1.1746	1.27562	0.561951	0.972512	-0.999999	1.34164	0.117362	-0.52421	8.09385
0.24438	-0.394284	0.561951	-0.65588	0.999999	0.447213	0.117362	1.41134	1.65643
0.906572	-0.95092	-0.561951	-0.65588	0.999999	1.34164	1.24404	0.120972	5.03061
-0.985404	0.997307	0	0.972512	-0.999999	0.447213	-1.00932	-0.52421	3.67781
2.04176	-1.78587	-0.561951	-1.47008	0.999999	-0.447213	-1.00932	-0.52421	0.198619
-1.1746	1.27562	0.561951	0.972512	-0.999999	1.34164	1.24404	-1.16939	7.97235
-0.701608	0.718989	-0.561951	0.972512	-0.999999	0.447213	1.24404	-1.16939	7.26689
1.28497	-1.22924	0	-1.19868	0.999999	1.34164	1.24404	1.41134	1.28255
0.24438	-0.394284	0.561951	-0.65588	0.999999	-1.34164	-1.00932	-1.16939	1.31429
-0.228614	0.162352	-1.68585	0.972512	-0.999999	1.34164	-1.00932	-1.16939	-1.18184
0.906572	-0.95092	-0.561951	-0.65588	0.999999	-1.34164	1.24404	0.120972	0.889838
0.24438	-0.394284	0.561951	-0.65588	0.999999	-1.34164	0.117362	0.766153	1.75461
-0.985404	0.997307	0	0.972512	-0.999999	1.34164	0.117362	0.766153	-0.930934
-0.51241	0.44067	-1.1239	0.972512	-0.999999	-1.34164	-1.00932	1.41134	-1.14316
0.24438	-0.394284	0.561951	-0.65588	0.999999	0.447213	-1.00932	0.120972	5.80161
-0.0394162	-0.115966	2.24781	-1.19868	0.999999	-0.447213	-1.00932	0.766153	0.998926
1.28497	-1.22924	0	-1.19868	0.999999	1.34164	-1.00932	0.766153	0.742074
-0.51241	0.44067	-1.1239	0.972512	-0.999999	1.34164	-1.00932	0.766153	-1.14911
0.24438	-0.394284	0.561951	-0.65588	0.999999	0.447213	1.24404	0.766153	1.88551
-1.3638	1.55394	1.1239	0.972512	-0.999999	-1.34164	1.24404	-1.16939	-0.715734
-0.985404	0.997307	0	0.972512	-0.999999	-0.447213	0.117362	0.120972	-0.922008
-0.701608	0.718989	-0.561951	0.972512	-0.999999	0.447213	0.117362	-0.52421	-0.949776
0.528177	-0.672602	0	-0.65588	0.999999	-0.447213	-1.00932	0.766153	0.0488717
2.04176	-1.78587	-0.561951	-1.47008	0.999999	1.34164	-1.76043	-1.81457	-0.670115
-0.985404	0.997307	0	0.972512	-0.999999	-1.34164	0.117362	0.766153	4.92135
-1.3638	1.55394	1.1239	0.972512	-0.999999	-0.447213	-1.00932	-0.52421	-0.923
-1.3638	1.55394	1.1239	0.972512	-0.999999	-0.447213	-1.76043	-1.81457	-1.37026
-0.985404	0.997307	0	0.972512	-0.999999	-0.447213	-1.00932	-1.16939	-1.05291
0.24438	-0.394284	0.561951	-0.65588	0.999999	0.447213	0.117362	0.120972	1.73576
1.28497	-1.22924	0	-1.19868	0.999999	-1.34164	1.24404	-1.16939	1.40453
0.528177	-0.672602	0	-0.65588	0.999999	1.34164	1.24404	-1.16939	0.62902
0.528177	-0.672602	0	-0.65588	0.999999	-0.447213	0.117362	0.120972	0.314649
-0.0394162	-0.115966	2.24781	-1.19868	0.999999	1.34164	-1.00932	0.766153	0.991984
-0.228614	0.162352	-1.68585	0.972512	-0.999999	1.34164	1.24404	1.41134	-0.785153
2.04176	-1.78587	-0.561951	-1.47008	0.999999	1.34164	0.117362	0.766153	0.626045
-1.3638	1.55394	1.1239	0.972512	-0.999999	1.34164	1.24404	-0.52421	4.29844
-1.1746	1.27562	0.561951	0.972512	-0.999999	-1.34164	1.24404	0.766153	-0.322026
-0.0394162	-0.115966	2.24781	-1.19868	0.999999	0.447213	-1.00932	0.120972	0.993968
-1.3638	1.55394	1.1239	0.972512	-0.999999	0.447213	-1.00932	-1.16939	-0.929942
-1.1746	1.27562	0.561951	0.972512	-0.999999	-0.447213	0.117362	0.120972	-0.53326
0.528177	-0.672602	0	-0.65588	0.999999	1.34164	1.24404	-0.52421	0.565551
1.28497	-1.22924	0	-1.19868	0.999999	-0.447213	0.117362	1.41134	0.991984
-0.701608	0.718989	-0.561951	0.972512	-0.999999	1.34164	-1.00932	1.41134	-1.10547
1.28497	-1.22924	0	-1.19868	0.999999	-1.34164	-1.00932	-0.52421	0.651829
-1.1746	1.27562	0.561951	0.972512	-0.999999	-0.447213	-1.00932	0.766153	-0.705817
-0.51241	0.44067	-1.1239	0.972512	-0.999999	-1.34164	1.24404	-1.16939	2.71589
2.04176	-1.78587	-0.561951	-1.47008	0.999999	-1.34164	0.117362	1.41134	0.632987
0.24438	-0.394284	0.561951	-0.65588	0.999999	-0.447213	0.117362	-1.16939	1.75758
-0.701608	0.718989	-0.561951	0.972512	-0.999999	-0.447213	-1.00932	0.120972	-1.10547
-0.985404	0.997307	0	0.972512	-0.999999	1.34164	-1.00932	0.120972	-1.06085
0.906572	-0.95092	-0.561951	-0.65588	0.999999	1.34164	-1.00932	-0.52421	0.302748
-0.985404	0.997307	0	0.972512	-0.999999	1.34164	1.24404	-0.52421	-0.694908
2.04176	-1.78587	-0.561951	-1.47008	0.999999	0.447213	0.117362	-1.16939	0.601252
2.04176	-1.78587	-0.561951	-1.47008	0.999999	1.34164	0.117362	0.120972	0.627036
-0.51241	0.44067	-1.1239	0.972512	-0.999999	-1.34164	-1.00932	-0.52421	-1.15704
-0.51241	0.44067	-1.1239	0.972512	-0.999999	-1.34164	-1.00932	-1.16939	-1.1501
-1.3638	1.55394	1.1239	0.972512	-0.999999	1.34164	-1.00932	0.766153	-0.923
0.24438	-0.394284	0.561951	-0.65588	0.999999	0.447213	-1.00932	1.41134	1.43429
-0.701608	0.718989	-0.561951	0.972512	-0.999999	-1.34164	0.117362	-0.52421	-0.937876
2.04176	-1.78587	-0.561951	-1.47008	0.999999	0.447213	1.24404	-0.52421	0.985042
-0.701608	0.718989	-0.561951	0.972512	-0.999999	1.34164	1.24404	-1.16939	5.95001
-0.51241	0.44067	-1.1239	0.972512	-0.999999	0.447213	0.117362	-0.52421	-1.00234
0.528177	-0.672602	0	-0.65588	0.999999	-1.34164	0.117362	0.120972	0.237296
-1.1746	1.27562	0.561951	0.972512	-0.999999	-0.447213	-1.00932	-0.52421	-0.706808
0.24438	-0.394284	0.561951	-0.65588	0.999999	1.34164	-1.00932	0.120972	1.42734
-0.0394162	-0.115966	2.24781	-1.19868	0.999999	-1.34164	1.24404	-1.16939	1.83196
0.24438	-0.394284	0.561951	-0.65588	0.999999	1.34164	-1.76043	-1.81457	4.64579
-0.701608	0.718989	-0.561951	0.972512	-0.999999	-0.447213	0.117362	0.766153	-0.927959
2.04176	-1.78587	-0.561951	-1.47008	0.999999	-1.34164	1.24404	-0.52421	1.04256
1.28497	-1.22924	0	-1.19868	0.999999	0.447213	-1.00932	-0.52421	0.64687
-1.1746	1.27562	0.561951	0.972512	-0.999999	0.447213	0.117362	0.120972	-0.560036
-0.228614	0.162352	-1.68585	0.972512	-0.999999	0.447213	-1.00932	-1.16939	-1.18481
-0.51241	0.44067	-1.1239	0.972512	-0.999999	1.34164	0.117362	0.766153	-0.994403
-1.1746	1.27562	0.561951	0.972512	-0.999999	1.34164	1.24404	0.766153	-0.343844
-0.0394162	-0.115966	2.24781	-1.19868	0.999999	-1.34164	-1.00932	0.120972	1.01281
2.04176	-1.78587	-0.561951	-1.47008	0.999999	-1.34164	-1.76043	-1.81457	-0.670115
-1.1746	1.27562	0.561951	0.972512	-0.999999	-0.447213	1.24404	0.120972	-0.356736
0.906572	-0.95092	-0.561951	-0.65588	0.999999	-1.34164	-1.00932	0.120972	0.307707
-1.3638	1.55394	1.1239	0.972512	-0.999999	-0.447213	0.117362	-1.16939	-0.712758
-1.3638	1.55394	1.1239	0.972512	-0.999999	1.34164	0.117362	-1.16939	-0.708792
-1.1746	1.27562	0.561951	0.972512	-0.999999	0.447213	-1.00932	-0.52421	-0.690941
-0.0394162	-0.115966	2.24781	-1.19868	0.999999	1.34164	1.24404	0.120972	9.31808
1.28497	-1.22924	0	-1.19868	0.999999	-1.34164	0.117362	-0.52421	1.00686
-0.51241	0.44067	-1.1239	0.972512	-0.999999	-1.34164	-1.00932	0.120972	-1.14415
-0.0394162	-0.115966	2.24781	-1.19868	0.999999	-0.447213	1.24404	-1.16939	1.75163
-1.3638	1.55394	1.1239	0.972512	-0.999999	1.34164	0.117362	0.120972	-0.824821
-1.1746	1.27562	0.561951	0.972512	-0.999999	-1.34164	0.117362	0.120972	-0.543177
-0.0394162	-0.115966	2.24781	-1.19868	0.999999	-0.447213	0.117362	0.120972	1.41643
-1.3638	1.55394	1.1239	0.972512	-0.999999	0.447213	1.24404	0.120972	-0.570945
-0.51241	0.44067	-1.1239	0.972512	-0.999999	-0.447213	1.24404	1.41134	-0.959693
0.906572	-0.95092	-0.561951	-0.65588	0.999999	-0.447213	0.117362	0.120972	0.703398
-0.51241	0.44067	-1.1239	0.972512	-0.999999	1.34164	1.24404	1.41134	-0.980519
-0.985404	0.997307	0	0.972512	-0.999999	0.447213	1.24404	0.766153	-0.715734
-0.0394162	-0.115966	2.24781	-1.19868	0.999999	1.34164	0.117362	0.766153	1.38371
0.528177	-0.672602	0	-0.65588	0.999999	0.447213	1.24404	0.120972	0.71034
0.906572	-0.95092	-0.561951	-0.65588	0.999999	-1.34164	-1.00932	-1.16939	0.393985
-0.228614	0.162352	-1.68585	0.972512	-0.999999	-0.447213	1.24404	-0.52421	-0.779203
1.28497	-1.22924	0	-1.19868	0.999999	1.34164	1.24404	-1.16939	1.35396
-0.228614	0.162352	-1.68585	0.972512	-0.999999	-1.34164	0.117362	-0.52421	-0.987461
1.28497	-1.22924	0	-1.19868	0.999999	-1.34164	0.117362	0.766153	1.02769
-0.228614	0.162352	-1.68585	0.972512	-0.999999	0.447213	-1.76043	-1.81457	-1.6162
-0.701608	0.718989	-0.561951	0.972512	-0.999999	1.34164	0.117362	-1.16939	-0.950768
0.906572	-0.95092	-0.561951	-0.65588	0.999999	-0.447213	0.117362	0.766153	0.606211
2.04176	-1.78587	-0.561951	-1.47008	0.999999	0.447213	-1.00932	-0.52421	0.180769
-0.701608	0.718989	-0.561951	0.972512	-0.999999	-0.447213	-1.00932	-1.16939	-1.10845
-1.1746	1.27562	0.561951	0.972512	-0.999999	0.447213	0.117362	-1.16939	-0.474749
-0.985404	0.997307	0	0.972512	-0.999999	0.447213	0.117362	1.41134	5.37642
0.24438	-0.394284	0.561951	-0.65588	0.999999	1.34164	0.117362	0.120972	1.73775
-1.1746	1.27562	0.561951	0.972512	-0.999999	0.447213	1.24404	-0.52421	-0.337894
-0.51241	0.44067	-1.1239	0.972512	-0.999999	1.34164	1.24404	-1.16939	-0.766311
2.04176	-1.78587	-0.561951	-1.47008	0.999999	-0.447213	0.117362	-0.52421	0.621086
-0.0394162	-0.115966	2.24781	-1.19868	0.999999	1.34164	-1.00932	-1.16939	0.982067
0.24438	-0.394284	0.561951	-0.65588	0.999999	1.34164	-1.00932	-0.52421	1.3609
-0.51241	0.44067	-1.1239	0.972512	-0.999999	0.447213	1.24404	0.120972	-0.82978
-0.985404	0.997307	0	0.972512	-0.999999	-1.34164	0.117362	-1.16939	-0.906141
-0.51241	0.44067	-1.1239	0.972512	-0.999999	-1.34164	1.24404	-0.52421	-0.75441
-0.701608	0.718989	-0.561951	0.972512	-0.999999	1.34164	-1.00932	0.120972	-1.10746
-0.0394162	-0.115966	2.24781	-1.19868	0.999999	-1.34164	1.24404	-0.52421	1.83196
1.28497	-1.22924	0	-1.19868	0.999999	-0.447213	1.24404	1.41134	1.25974
-0.51241	0.44067	-1.1239	0.972512	-0.999999	1.34164	-1.00932	0.120972	-1.15109
-0.701608	0.718989	-0.561951	0.972512	-0.999999	0.447213	0.117362	0.766153	-0.955726
-0.51241	0.44067	-1.1239	0.972512	-0.999999	1.34164	1.24404	0.120972	-0.837713
-1.3638	1.55394	1.1239	0.972512	-0.999999	0.447213	1.24404	-0.52421	-0.500533
-0.701608	0.718989	-0.561951	0.972512	-0.999999	1.34164	1.24404	0.120972	-0.815896
1.28497	-1.22924	0	-1.19868	0.999999	-0.447213	0.117362	0.766153	0.930498
0.528177	-0.672602	0	-0.65588	0.999999	1.34164	-1.00932	1.41134	0.153993
1.28497	-1.22924	0	-1.19868	0.999999	-0.447213	-1.00932	-0.52421	0.731165
2.04176	-1.78587	-0.561951	-1.47008	0.999999	-0.447213	1.24404	-1.16939	0.987026
0.906572	-0.95092	-0.561951	-0.65588	0.999999	0.447213	-1.00932	1.41134	0.302748
0.24438	-0.394284	0.561951	-0.65588	0.999999	0.447213	-1.00932	-1.16939	1.44718
-1.3638	1.55394	1.1239	0.972512	-0.999999	1.34164	-1.00932	0.120972	-0.949776
0.906572	-0.95092	-0.561951	-0.65588	0.999999	-0.447213	-1.00932	0.766153	0.30374
1.28497	-1.22924	0	-1.19868	0.999999	1.34164	-1.00932	0.120972	0.668688
0.24438	-0.394284	0.561951	-0.65588	0.999999	1.34164	1.24404	1.41134	1.83295
-1.3638	1.55394	1.1239	0.972512	-0.999999	-0.447213	-1.00932	-1.16939	-0.925975
-0.228614	0.162352	-1.68585	0.972512	-0.999999	1.34164	1.24404	0.120972	-0.845647
0.528177	-0.672602	0	-0.65588	0.999999	1.34164	0.117362	0.766153	0.366218
-1.3638	1.55394	1.1239	0.972512	-0.999999	0.447213	-1.00932	0.766153	-0.923
2.04176	-1.78587	-0.561951	-1.47008	0.999999	-1.34164	0.117362	-1.16939	0.579434
-0.228614	0.162352	-1.68585	0.972512	-0.999999	1.34164	-1.00932	-0.52421	-1.17589
0.906572	-0.95092	-0.561951	-0.65588	0.999999	1.34164	-1.00932	0.120972	0.411836
2.04176	-1.78587	-0.561951	-1.47008	0.999999	1.34164	-1.00932	-0.52421	0.192669
-1.3638	1.55394	1.1239	0.972512	-0.999999	-1.34164	-1.00932	1.41134	-0.96366
0.24438	-0.394284	0.561951	-0.65588	0.999999	1.34164	0.117362	-0.52421	5.37111
0.528177	-0.672602	0	-0.65588	0.999999	-1.34164	1.24404	0.120972	0.631003
-0.701608	0.718989	-0.561951	0.972512	-0.999999	-0.447213	-1.00932	0.766153	7.40136
0.24438	-0.394284	0.561951	-0.65588	0.999999	0.447213	0.117362	-0.52421	1.75163
0.906572	-0.95092	-0.561951	-0.65588	0.999999	1.34164	0.117362	-1.16939	0.630011
-1.3638	1.55394	1.1239	0.972512	-0.999999	-0.447213	1.24404	-1.16939	-0.509459
0.24438	-0.394284	0.561951	-0.65588	0.999999	-1.34164	1.24404	0.766153	2.02931
2.04176	-1.78587	-0.561951	-1.47008	0.999999	0.447213	1.24404	0.120972	5.44238
-0.701608	0.718989	-0.561951	0.972512	-0.999999	1.34164	0.117362	-0.52421	-0.927959
-1.1746	1.27562	0.561951	0.972512	-0.999999	-0.447213	1.24404	0.766153	-0.315084
0.528177	-0.672602	0	-0.65588	0.999999	-1.34164	-1.00932	0.766153	0.148042
-1.1746	1.27562	0.561951	0.972512	-0.999999	0.447213	-1.00932	0.766153	2.33769
-0.701608	0.718989	-0.561951	0.972512	-0.999999	1.34164	1.24404	1.41134	-0.803004
-0.51241	0.44067	-1.1239	0.972512	-0.999999	-0.447213	0.117362	-0.52421	-0.993411
-1.1746	1.27562	0.561951	0.972512	-0.999999	-1.34164	1.24404	-0.52421	-0.308142
0.24438	-0.394284	0.561951	-0.65588	0.999999	-0.447213	0.117362	1.41134	1.73775
0.906572	-0.95092	-0.561951	-0.65588	0.999999	-1.34164	-1.00932	1.41134	0.468363
-0.985404	0.997307	0	0.972512	-0.999999	-1.34164	0.117362	-0.52421	6.93233
-0.985404	0.997307	0	0.972512	-0.999999	0.447213	-1.00932	0.766153	-1.08862
0.24438	-0.394284	0.561951	-0.65588	0.999999	1.34164	0.117362	-1.16939	1.6594
0.528177	-0.672602	0	-0.65588	0.999999	0.447213	1.24404	0.766153	0.628028
-1.1746	1.27562	0.561951	0.972512	-0.999999	1.34164	0.117362	1.41134	-0.534251
-0.985404	0.997307	0	0.972512	-0.999999	1.34164	-1.00932	0.766153	3.62935
0.528177	-0.672602	0	-0.65588	0.999999	1.34164	0.117362	1.41134	0.315641
-1.1746	1.27562	0.561951	0.972512	-0.999999	1.34164	-1.00932	-1.16939	-0.703833
-0.701608	0.718989	-0.561951	0.972512	-0.999999	0.447213	-1.00932	0.766153	-1.1144
-0.701608	0.718989	-0.561951	0.972512	-0.999999	1.34164	-1.76043	-1.81457	5.93647
-0.51241	0.44067	-1.1239	0.972512	-0.999999	-1.34164	0.117362	0.120972	-0.981511
0.528177	-0.672602	0	-0.65588	0.999999	-0.447213	1.24404	0.766153	0.569517
-1.3638	1.55394	1.1239	0.972512	-0.999999	-1.34164	-1.00932	0.120972	-0.954735
-0.701608	0.718989	-0.561951	0.972512	-0.999999	-1.34164	0.117362	-1.16939	5.52356
-0.985404	0.997307	0	0.972512	-0.999999	-0.447213	-1.76043	-1.81457	-1.50811
2.04176	-1.78587	-0.561951	-1.47008	0.999999	0.447213	-1.00932	0.766153	0.171843
1.28497	-1.22924	0	-1.19868	0.999999	1.34164	-1.76043	-1.81457	-0.260541
0.906572	-0.95092	-0.561951	-0.65588	0.999999	0.447213	0.117362	-0.52421	0.690506
-1.1746	1.27562	0.561951	0.972512	-0.999999	-1.34164	1.24404	0.120972	-0.379545
-1.3638	1.55394	1.1239	0.972512	-0.999999	1.34164	0.117362	1.41134	-0.837713
-0.0394162	-0.115966	2.24781	-1.19868	0.999999	0.447213	-1.00932	0.766153	1.06934
-0.0394162	-0.115966	2.24781	-1.19868	0.999999	-0.447213	0.117362	-0.52421	1.38569
-0.51241	0.44067	-1.1239	0.972512	-0.999999	-1.34164	0.117362	-1.16939	-0.965643
2.04176	-1.78587	-0.561951	-1.47008	0.999999	-0.447213	-1.76043	-1.81457	4.05143
-0.985404	0.997307	0	0.972512	-0.999999	1.34164	1.24404	1.41134	-0.708792
1.28497	-1.22924	0	-1.19868	0.999999	-1.34164	0.117362	1.41134	5.39792
-0.985404	0.997307	0	0.972512	-0.999999	0.447213	0.117362	-0.52421	-0.945809
-0.51241	0.44067	-1.1239	0.972512	-0.999999	0.447213	-1.00932	1.41134	-1.15407
0.906572	-0.95092	-0.561951	-0.65588	0.999999	-0.447213	0.117362	1.41134	0.672655
0.528177	-0.672602	0	-0.65588	0.999999	-0.447213	-1.00932	-1.16939	0.170852
-1.1746	1.27562	0.561951	0.972512	-0.999999	-0.447213	1.24404	-1.16939	3.6174
-0.228614	0.162352	-1.68585	0.972512	-0.999999	-0.447213	1.24404	0.766153	-0.776228
-0.985404	0.997307	0	0.972512	-0.999999	-1.34164	-1.00932	-0.52421	-1.07671
2.04176	-1.78587	-0.561951	-1.47008	0.999999	1.34164	1.24404	0.766153	1.03463
-0.701608	0.718989	-0.561951	0.972512	-0.999999	1.34164	0.117362	0.120972	-1.01027
-0.0394162	-0.115966	2.24781	-1.19868	0.999999	-0.447213	-1.00932	-1.16939	0.973142
-0.0394162	-0.115966	2.24781	-1.19868	0.999999	-1.34164	1.24404	0.766153	1.82204
0.906572	-0.95092	-0.561951	-0.65588	0.999999	-0.447213	-1.00932	-0.52421	0.467372
0.906572	-0.95092	-0.561951	-0.65588	0.999999	0.447213	1.24404	1.41134	0.873971
1.28497	-1.22924	0	-1.19868	0.999999	0.447213	-1.00932	0.120972	0.725215
0.528177	-0.672602	0	-0.65588	0.999999	-1.34164	1.24404	1.41134	0.7629
-0.51241	0.44067	-1.1239	0.972512	-0.999999	0.447213	0.117362	-1.16939	-0.965643
-0.228614	0.162352	-1.68585	0.972512	-0.999999	-0.447213	1.24404	0.120972	-0.802012
0.906572	-0.95092	-0.561951	-0.65588	0.999999	0.447213	-1.00932	0.120972	0.454479
-0.228614	0.162352	-1.68585	0.972512	-0.999999	-0.447213	1.24404	1.41134	-0.804987
-0.985404	0.997307	0	0.972512	-0.999999	1.34164	1.24404	0.120972	-0.734576
-0.0394162	-0.115966	2.24781	-1.19868	0.999999	0.447213	1.24404	-1.16939	1.82502
2.04176	-1.78587	-0.561951	-1.47008	0.999999	-0.447213	-1.00932	0.120972	0.207545
-1.1746	1.27562	0.561951	0.972512	-0.999999	-1.34164	-1.00932	-0.52421	-0.683999
-0.51241	0.44067	-1.1239	0.972512	-0.999999	-0.447213	-1.00932	0.766153	-1.15308
0.24438	-0.394284	0.561951	-0.65588	0.999999	-0.447213	0.117362	-0.52421	1.77345
-1.3638	1.55394	1.1239	0.972512	-0.999999	-0.447213	0.117362	0.766153	-0.763335
-0.0394162	-0.115966	2.24781	-1.19868	0.999999	-0.447213	1.24404	0.766153	1.79427
2.04176	-1.78587	-0.561951	-1.47008	0.999999	-0.447213	0.117362	1.41134	0.622078
-0.985404	0.997307	0	0.972512	-0.999999	-0.447213	1.24404	0.120972	-0.706808
-0.51241	0.44067	-1.1239	0.972512	-0.999999	-0.447213	-1.00932	1.41134	-1.15109
1.28497	-1.22924	0	-1.19868	0.999999	-1.34164	-1.00932	-1.16939	0.666705
0.528177	-0.672602	0	-0.65588	0.999999	1.34164	-1.00932	0.120972	0.154984
1.28497	-1.22924	0	-1.19868	0.999999	0.447213	1.24404	0.766153	1.29842
1.28497	-1.22924	0	-1.19868	0.999999	0.447213	0.117362	-0.52421	0.993968
-0.228614	0.162352	-1.68585	0.972512	-0.999999	1.34164	0.117362	0.766153	-0.979527
0.24438	-0.394284	0.561951	-0.65588	0.999999	-0.447213	0.117362	0.120972	1.59097
0.528177	-0.672602	0	-0.65588	0.999999	-1.34164	0.117362	1.41134	0.336466
0.906572	-0.95092	-0.561951	-0.65588	0.999999	-0.447213	-1.76043	-1.81457	-0.233764
-0.0394162	-0.115966	2.24781	-1.19868	0.999999	-1.34164	0.117362	0.120972	1.35693
1.28497	-1.22924	0	-1.19868	0.999999	1.34164	0.117362	1.41134	1.00686
-0.51241	0.44067	-1.1239	0.972512	-0.999999	-1.34164	0.117362	0.766153	-0.986469
0.906572	-0.95092	-0.561951	-0.65588	0.999999	0.447213	0.117362	1.41134	0.595302
0.24438	-0.394284	0.561951	-0.65588	0.999999	-1.34164	-1.00932	-0.52421	1.32321
0.906572	-0.95092	-0.561951	-0.65588	0.999999	-0.447213	1.24404	-0.52421	1.03463
0.906572	-0.95092	-0.561951	-0.65588	0.999999	-0.447213	0.117362	-0.52421	0.750008
-0.228614	0.162352	-1.68585	0.972512	-0.999999	0.447213	1.24404	0.766153	-0.792095
-0.228614	0.162352	-1.68585	0.972512	-0.999999	0.447213	1.24404	1.41134	-0.806971
2.04176	-1.78587	-0.561951	-1.47008	0.999999	-0.447213	1.24404	0.120972	1.02967
0.906572	-0.95092	-0.561951	-0.65588	0.999999	-0.447213	1.24404	-1.16939	0.999918
-0.228614	0.162352	-1.68585	0.972512	-0.999999	-1.34164	-1.00932	0.766153	-1.21258
0.528177	-0.672602	0	-0.65588	0.999999	0.447213	-1.00932	0.766153	0.127217
-0.701608	0.718989	-0.561951	0.972512	-0.999999	0.447213	-1.00932	-0.52421	-1.08961
-0.985404	0.997307	0	0.972512	-0.999999	1.34164	0.117362	1.41134	-0.921017
-0.985404	0.997307	0	0.972512	-0.999999	-1.34164	0.117362	0.120972	3.47485
1.28497	-1.22924	0	-1.19868	0.999999	-0.447213	-1.00932	-1.16939	0.750008
0.528177	-0.672602	0	-0.65588	0.999999	-1.34164	-1.00932	-0.52421	0.143084
-0.985404	0.997307	0	0.972512	-0.999999	1.34164	0.117362	-1.16939	-0.905149
0.528177	-0.672602	0	-0.65588	0.999999	-1.34164	1.24404	-1.16939	0.685547
2.04176	-1.78587	-0.561951	-1.47008	0.999999	-1.34164	1.24404	0.120972	1.04256
0.528177	-0.672602	0	-0.65588	0.999999	-1.34164	-1.00932	-1.16939	0.121266
-0.51241	0.44067	-1.1239	0.972512	-0.999999	-1.34164	0.117362	-0.52421	-0.989444
-0.51241	0.44067	-1.1239	0.972512	-0.999999	0.447213	-1.00932	-0.52421	-1.16597
-0.985404	0.997307	0	0.972512	-0.999999	-0.447213	0.117362	-1.16939	-0.905149
0.906572	-0.95092	-0.561951	-0.65588	0.999999	0.447213	0.117362	-1.16939	0.723232
-1.1746	1.27562	0.561951	0.972512	-0.999999	1.34164	-1.00932	1.41134	-0.688958
0.528177	-0.672602	0	-0.65588	0.999999	0.447213	1.24404	1.41134	0.66968
-1.3638	1.55394	1.1239	0.972512	-0.999999	-1.34164	0.117362	0.766153	-0.791103
-1.1746	1.27562	0.561951	0.972512	-0.999999	0.447213	1.24404	1.41134	-0.41128
-0.51241	0.44067	-1.1239	0.972512	-0.999999	0.447213	1.24404	-0.52421	-0.784161
-0.701608	0.718989	-0.561951	0.972512	-0.999999	0.447213	1.24404	1.41134	-0.787136
-1.3638	1.55394	1.1239	0.972512	-0.999999	-1.34164	1.24404	0.120972	-0.578878
0.906572	-0.95092	-0.561951	-0.65588	0.999999	1.34164	-1.00932	-1.16939	0.293823
-0.985404	0.997307	0	0.972512	-0.999999	1.34164	0.117362	0.120972	-0.938867
0.24438	-0.394284	0.561951	-0.65588	0.999999	1.34164	-1.00932	0.766153	1.46701
2.04176	-1.78587	-0.561951	-1.47008	0.999999	0.447213	0.117362	0.766153	0.579434
-1.3638	1.55394	1.1239	0.972512	-0.999999	-0.447213	1.24404	-0.52421	-0.503509
-0.985404	0.997307	0	0.972512	-0.999999	-0.447213	0.117362	1.41134	-0.940851
-0.0394162	-0.115966	2.24781	-1.19868	0.999999	-1.34164	0.117362	1.41134	1.32718
2.04176	-1.78587	-0.561951	-1.47008	0.999999	1.34164	1.24404	0.120972	1.03562
-0.51241	0.44067	-1.1239	0.972512	-0.999999	-0.447213	-1.00932	-1.16939	3.4871
-0.0394162	-0.115966	2.24781	-1.19868	0.999999	-0.447213	0.117362	-1.16939	1.37082
-0.0394162	-0.115966	2.24781	-1.19868	0.999999	-1.34164	-1.00932	-1.16939	1.05645
1.28497	-1.22924	0	-1.19868	0.999999	1.34164	0.117362	-0.52421	0.927523
-0.228614	0.162352	-1.68585	0.972512	-0.999999	-1.34164	0.117362	0.120972	-1.042
-0.0394162	-0.115966	2.24781	-1.19868	0.999999	1.34164	0.117362	-0.52421	1.40255
0.528177	-0.672602	0	-0.65588	0.999999	-1.34164	-1.00932	1.41134	0.20457
-0.228614	0.162352	-1.68585	0.972512	-0.999999	1.34164	1.24404	-0.52421	-0.774244
2.04176	-1.78587	-0.561951	-1.47008	0.999999	-0.447213	0.117362	-1.16939	0.579434
0.528177	-0.672602	0	-0.65588	0.999999	0.447213	0.117362	0.120972	4.0052
2.04176	-1.78587	-0.561951	-1.47008	0.999999	0.447213	0.117362	0.120972	0.581418
0.906572	-0.95092	-0.561951	-0.65588	0.999999	-0.447213	1.24404	0.120972	0.973142
-0.985404	0.997307	0	0.972512	-0.999999	0.447213	-1.00932	1.41134	-1.09952
-1.3638	1.55394	1.1239	0.972512	-0.999999	-1.34164	0.117362	1.41134	-0.855564
-0.701608	0.718989	-0.561951	0.972512	-0.999999	0.447213	1.24404	-0.52421	-0.791103
-0.701608	0.718989	-0.561951	0.972512	-0.999999	-0.447213	-1.00932	-0.52421	-1.07572
0.528177	-0.672602	0	-0.65588	0.999999	-1.34164	0.117362	-0.52421	0.340433
-0.51241	0.44067	-1.1239	0.972512	-0.999999	0.447213	1.24404	0.766153	-0.777219
2.04176	-1.78587	-0.561951	-1.47008	0.999999	-0.447213	1.24404	-0.52421	1.03165
-0.701608	0.718989	-0.561951	0.972512	-0.999999	-0.447213	-1.76043	-1.81457	-1.53885
-1.1746	1.27562	0.561951	0.972512	-0.999999	1.34164	-1.00932	0.120972	-0.688958
-1.3638	1.55394	1.1239	0.972512	-0.999999	0.447213	1.24404	0.766153	-0.532268
-1.1746	1.27562	0.561951	0.972512	-0.999999	0.447213	-1.00932	1.41134	-0.712758
1.28497	-1.22924	0	-1.19868	0.999999	1.34164	0.117362	0.120972	0.990001
-1.1746	1.27562	0.561951	0.972512	-0.999999	1.34164	0.117362	0.120972	-0.540202
-0.701608	0.718989	-0.561951	0.972512	-0.999999	-0.447213	0.117362	1.41134	-1.01027
-0.228614	0.162352	-1.68585	0.972512	-0.999999	1.34164	-1.00932	0.120972	-1.18283
0.906572	-0.95092	-0.561951	-0.65588	0.999999	-1.34164	0.117362	0.766153	0.71034
-0.701608	0.718989	-0.561951	0.972512	-0.999999	-1.34164	0.117362	0.120972	3.47272
-1.1746	1.27562	0.561951	0.972512	-0.999999	1.34164	-1.00932	0.766153	-0.708792
-0.701608	0.718989	-0.561951	0.972512	-0.999999	-0.447213	1.24404	-1.16939	-0.75441
-0.228614	0.162352	-1.68585	0.972512	-0.999999	1.34164	-1.00932	0.766153	-1.20663
1.28497	-1.22924	0	-1.19868	0.999999	-1.34164	0.117362	0.120972	0.924548
2.04176	-1.78587	-0.561951	-1.47008	0.999999	-1.34164	-1.00932	-0.52421	0.196636
0.528177	-0.672602	0	-0.65588	0.999999	1.34164	0.117362	-0.52421	0.261097
-0.701608	0.718989	-0.561951	0.972512	-0.999999	-0.447213	0.117362	-1.16939	-0.929942
0.24438	-0.394284	0.561951	-0.65588	0.999999	-1.34164	0.117362	-0.52421	1.61279
0.906572	-0.95092	-0.561951	-0.65588	0.999999	-0.447213	-1.00932	-1.16939	0.456463
-0.985404	0.997307	0	0.972512	-0.999999	-1.34164	0.117362	1.41134	-0.929942
-1.1746	1.27562	0.561951	0.972512	-0.999999	-0.447213	0.117362	-1.16939	-0.491608
0.906572	-0.95092	-0.561951	-0.65588	0.999999	0.447213	1.24404	0.120972	0.9662
-0.51241	0.44067	-1.1239	0.972512	-0.999999	-1.34164	-1.00932	0.766153	-1.15506
-0.228614	0.162352	-1.68585	0.972512	-0.999999	-0.447213	-1.00932	0.766153	3.909
0.528177	-0.672602	0	-0.65588	0.999999	1.34164	1.24404	0.766153	0.715298
-0.0394162	-0.115966	2.24781	-1.19868	0.999999	0.447213	0.117362	-0.52421	1.44321
0.528177	-0.672602	0	-0.65588	0.999999	-1.34164	-1.00932	0.120972	0.0617639
-1.3638	1.55394	1.1239	0.972512	-0.999999	0.447213	0.117362	0.766153	-0.763335
-0.701608	0.718989	-0.561951	0.972512	-0.999999	1.34164	1.24404	-0.52421	-0.762344
-1.3638	1.55394	1.1239	0.972512	-0.999999	0.447213	-1.00932	-0.52421	-0.925975
0.24438	-0.394284	0.561951	-0.65588	0.999999	-1.34164	-1.00932	0.120972	1.33611
-0.0394162	-0.115966	2.24781	-1.19868	0.999999	-1.34164	0.117362	0.766153	1.45214
0.24438	-0.394284	0.561951	-0.65588	0.999999	0.447213	1.24404	-1.16939	2.00253
-0.985404	0.997307	0	0.972512	-0.999999	0.447213	-1.76043	-1.81457	-1.50811
2.04176	-1.78587	-0.561951	-1.47008	0.999999	0.447213	-1.00932	1.41134	0.170852
-0.985404	0.997307	0	0.972512	-0.999999	-1.34164	-1.76043	-1.81457	6.486
-0.228614	0.162352	-1.68585	0.972512	-0.999999	-1.34164	-1.00932	-0.52421	-1.17886
1.28497	-1.22924	0	-1.19868	0.999999	-1.34164	1.24404	-0.52421	1.34206
-0.51241	0.44067	-1.1239	0.972512	-0.999999	1.34164	-1.00932	-1.16939	-1.14613
0.906572	-0.95092	-0.561951	-0.65588	0.999999	-1.34164	1.24404	1.41134	0.991984
-0.228614	0.162352	-1.68585	0.972512	-0.999999	-1.34164	-1.76043	-1.81457	-1.61025
-0.0394162	-0.115966	2.24781	-1.19868	0.999999	-0.447213	-1.00932	-0.52421	1.00091
1.28497	-1.22924	0	-1.19868	0.999999	1.34164	1.24404	-0.52421	1.32718
-1.3638	1.55394	1.1239	0.972512	-0.999999	0.447213	1.24404	-1.16939	-0.512434
1.28497	-1.22924	0	-1.19868	0.999999	-1.34164	-1.00932	0.120972	0.571501
-0.0394162	-0.115966	2.24781	-1.19868	0.999999	1.34164	1.24404	-1.16939	1.79725
-0.985404	0.997307	0	0.972512	-0.999999	0.447213	-1.00932	0.120972	-1.06878
0.906572	-0.95092	-0.561951	-0.65588	0.999999	1.34164	0.117362	1.41134	0.702406
0.24438	-0.394284	0.561951	-0.65588	0.999999	-1.34164	0.117362	-1.16939	1.62271
2.04176	-1.78587	-0.561951	-1.47008	0.999999	1.34164	-1.00932	1.41134	0.193661
0.528177	-0.672602	0	-0.65588	0.999999	-0.447213	0.117362	-1.16939	6.27137
0.24438	-0.394284	0.561951	-0.65588	0.999999	0.447213	0.117362	-1.16939	1.74072
-0.0394162	-0.115966	2.24781	-1.19868	0.999999	-0.447213	1.24404	1.41134	1.72684
2.04176	-1.78587	-0.561951	-1.47008	0.999999	0.447213	1.24404	0.766153	0.982067
-0.51241	0.44067	-1.1239	0.972512	-0.999999	0.447213	0.117362	1.41134	-0.997378
-0.985404	0.997307	0	0.972512	-0.999999	0.447213	1.24404	0.120972	-0.752427
-1.3638	1.55394	1.1239	0.972512	-0.999999	0.447213	-1.00932	1.41134	-0.942834
-0.228614	0.162352	-1.68585	0.972512	-0.999999	0.447213	0.117362	0.120972	-1.02415
0.24438	-0.394284	0.561951	-0.65588	0.999999	0.447213	1.24404	1.41134	1.8627
0.528177	-0.672602	0	-0.65588	0.999999	0.447213	0.117362	-1.16939	0.462413
-0.51241	0.44067	-1.1239	0.972512	-0.999999	-0.447213	1.24404	-1.16939	-0.764327
-0.228614	0.162352	-1.68585	0.972512	-0.999999	-1.34164	1.24404	1.41134	-0.78317
-0.0394162	-0.115966	2.24781	-1.19868	0.999999	0.447213	1.24404	0.120972	1.64453
0.528177	-0.672602	0	-0.65588	0.999999	1.34164	-1.76043	-1.81457	-0.627472
0.528177	-0.672602	0	-0.65588	0.999999	-0.447213	1.24404	-0.52421	0.712323
-0.51241	0.44067	-1.1239	0.972512	-0.999999	0.447213	0.117362	0.120972	-1.01225
1.28497	-1.22924	0	-1.19868	0.999999	-0.447213	0.117362	-0.52421	1.08719
-1.3638	1.55394	1.1239	0.972512	-0.999999	0.447213	0.117362	0.120972	-0.828788
-0.0394162	-0.115966	2.24781	-1.19868	0.999999	-1.34164	0.117362	-0.52421	1.45214
0.906572	-0.95092	-0.561951	-0.65588	0.999999	0.447213	1.24404	0.766153	0.976117
0.906572	-0.95092	-0.561951	-0.65588	0.999999	1.34164	0.117362	0.766153	0.751
0.24438	-0.394284	0.561951	-0.65588	0.999999	0.447213	-1.76043	-1.81457	0.726207
-1.3638	1.55394	1.1239	0.972512	-0.999999	1.34164	1.24404	0.120972	-0.552102
-0.701608	0.718989	-0.561951	0.972512	-0.999999	-0.447213	1.24404	0.766153	-0.762344
0.528177	-0.672602	0	-0.65588	0.999999	0.447213	-1.76043	-1.81457	-0.531276
-1.3638	1.55394	1.1239	0.972512	-0.999999	-1.34164	1.24404	1.41134	-0.571936
-0.985404	0.997307	0	0.972512	-0.999999	-0.447213	1.24404	-1.16939	-0.70185
0.528177	-0.672602	0	-0.65588	0.999999	-1.34164	1.24404	0.766153	0.656788
0.24438	-0.394284	0.561951	-0.65588	0.999999	-0.447213	-1.76043	-1.81457	0.752983
-1.3638	1.55394	1.1239	0.972512	-0.999999	1.34164	-1.00932	-1.16939	-0.921017
-0.51241	0.44067	-1.1239	0.972512	-0.999999	0.447213	-1.00932	0.766153	-1.16795
0.24438	-0.394284	0.561951	-0.65588	0.999999	1.34164	1.24404	-1.16939	8.06244
-1.3638	1.55394	1.1239	0.972512	-0.999999	-0.447213	-1.00932	1.41134	-0.948784
0.24438	-0.394284	0.561951	-0.65588	0.999999	1.34164	-1.00932	-1.16939	1.35197
0.528177	-0.672602	0	-0.65588	0.999999	-1.34164	1.24404	-0.52421	0.658771
-1.3638	1.55394	1.1239	0.972512	-0.999999	1.34164	1.24404	0.766153	-0.549127
2.04176	-1.78587	-0.561951	-1.47008	0.999999	0.447213	0.117362	-0.52421	0.58241
0.24438	-0.394284	0.561951	-0.65588	0.999999	-1.34164	-1.76043	-1.81457	0.616128
-0.0394162	-0.115966	2.24781	-1.19868	0.999999	-1.34164	0.117362	-1.16939	6.34991
-0.985404	0.997307	0	0.972512	-0.999999	-0.447213	0.117362	-0.52421	-0.929942
-1.3638	1.55394	1.1239	0.972512	-0.999999	-0.447213	1.24404	0.120972	-0.590779
0.528177	-0.672602	0	-0.65588	0.999999	1.34164	0.117362	0.120972	0.283906
-1.3638	1.55394	1.1239	0.972512	-0.999999	0.447213	0.117362	1.41134	-0.807962
-1.1746	1.27562	0.561951	0.972512	-0.999999	-1.34164	-1.00932	0.766153	-0.684991
-0.228614	0.162352	-1.68585	0.972512	-0.999999	1.34164	-1.76043	-1.81457	-1.61323
0.906572	-0.95092	-0.561951	-0.65588	0.999999	1.34164	-1.76043	-1.81457	-0.396404
-0.0394162	-0.115966	2.24781	-1.19868	0.999999	1.34164	1.24404	-0.52421	7.73747
-0.228614	0.162352	-1.68585	0.972512	-0.999999	1.34164	1.24404	0.766153	-0.780194
0.24438	-0.394284	0.561951	-0.65588	0.999999	-1.34164	-1.00932	1.41134	1.46007
-1.1746	1.27562	0.561951	0.972512	-0.999999	-0.447213	0.117362	-0.52421	-0.542185
2.04176	-1.78587	-0.561951	-1.47008	0.999999	0.447213	-1.00932	0.120972	0.178785
-1.1746	1.27562	0.561951	0.972512	-0.999999	0.447213	-1.76043	-1.81457	-1.14415
-0.985404	0.997307	0	0.972512	-0.999999	0.447213	0.117362	0.766153	-0.936884
-0.701608	0.718989	-0.561951	0.972512	-0.999999	-1.34164	1.24404	-1.16939	-0.773253
-1.1746	1.27562	0.561951	0.972512	-0.999999	-0.447213	1.24404	-0.52421	-0.339877
1.28497	-1.22924	0	-1.19868	0.999999	1.34164	0.117362	-1.16939	0.961241
-0.228614	0.162352	-1.68585	0.972512	-0.999999	0.447213	-1.00932	0.120972	-1.1858
-1.1746	1.27562	0.561951	0.972512	-0.999999	-1.34164	0.117362	-1.16939	-0.476732
-0.228614	0.162352	-1.68585	0.972512	-0.999999	-1.34164	1.24404	0.766153	-0.787136
-0.51241	0.44067	-1.1239	0.972512	-0.999999	-0.447213	-1.76043	-1.81457	-1.57753
-0.0394162	-0.115966	2.24781	-1.19868	0.999999	0.447213	1.24404	-0.52421	1.81113
-0.701608	0.718989	-0.561951	0.972512	-0.999999	-1.34164	1.24404	1.41134	-0.811929
-1.1746	1.27562	0.561951	0.972512	-0.999999	1.34164	1.24404	-0.52421	8.67081
2.04176	-1.78587	-0.561951	-1.47008	0.999999	-0.447213	-1.00932	-1.16939	0.230354
0.906572	-0.95092	-0.561951	-0.65588	0.999999	0.447213	1.24404	-1.16939	0.970167
1.28497	-1.22924	0	-1.19868	0.999999	1.34164	1.24404	0.766153	1.41445
0.528177	-0.672602	0	-0.65588	0.999999	1.34164	-1.00932	-1.16939	0.0270542
-0.701608	0.718989	-0.561951	0.972512	-0.999999	-1.34164	-1.00932	-0.52421	-1.07671
-1.1746	1.27562	0.561951	0.972512	-0.999999	-1.34164	1.24404	1.41134	-0.45789
-0.985404	0.997307	0	0.972512	-0.999999	-1.34164	1.24404	1.41134	-0.728626
0.906572	-0.95092	-0.561951	-0.65588	0.999999	1.34164	1.24404	-0.52421	0.92554
-0.228614	0.162352	-1.68585	0.972512	-0.999999	0.447213	0.117362	-1.16939	-0.981511
-0.51241	0.44067	-1.1239	0.972512	-0.999999	1.34164	0.117362	1.41134	-0.995395
-1.3638	1.55394	1.1239	0.972512	-0.999999	-0.447213	0.117362	0.120972	-0.790112
-0.0394162	-0.115966	2.24781	-1.19868	0.999999	0.447213	1.24404	0.766153	1.81411
-0.228614	0.162352	-1.68585	0.972512	-0.999999	-1.34164	-1.00932	-1.16939	7.62275
-0.701608	0.718989	-0.561951	0.972512	-0.999999	1.34164	0.117362	0.766153	4.38054
-0.701608	0.718989	-0.561951	0.972512	-0.999999	0.447213	0.117362	0.120972	-0.991428
-0.985404	0.997307	0	0.972512	-0.999999	-1.34164	1.24404	-1.16939	-0.70185
-0.51241	0.44067	-1.1239	0.972512	-0.999999	1.34164	0.117362	-1.16939	-0.959693
0.528177	-0.672602	0	-0.65588	0.999999	-0.447213	0.117362	-0.52421	0.364234
-0.0394162	-0.115966	2.24781	-1.19868	0.999999	0.447213	0.117362	0.766153	1.43825
-0.51241	0.44067	-1.1239	0.972512	-0.999999	-1.34164	1.24404	0.120972	-0.816888
-1.1746	1.27562	0.561951	0.972512	-0.999999	-0.447213	-1.00932	1.41134	-0.687966
-0.701608	0.718989	-0.561951	0.972512	-0.999999	-0.447213	1.24404	1.41134	-0.796062
-0.0394162	-0.115966	2.24781	-1.19868	0.999999	-1.34164	-1.00932	1.41134	0.991984
-1.3638	1.55394	1.1239	0.972512	-0.999999	-1.34164	1.24404	-0.52421	-0.550119
-0.701608	0.718989	-0.561951	0.972512	-0.999999	-1.34164	0.117362	1.41134	-0.975561
-1.3638	1.55394	1.1239	0.972512	-0.999999	1.34164	1.24404	-1.16939	-0.512434
-0.51241	0.44067	-1.1239	0.972512	-0.999999	-0.447213	0.117362	0.120972	-0.994403
0.24438	-0.394284	0.561951	-0.65588	0.999999	0.447213	-1.00932	0.766153	1.30338
-0.228614	0.162352	-1.68585	0.972512	-0.999999	-0.447213	-1.00932	1.41134	-1.18382
-0.0394162	-0.115966	2.24781	-1.19868	0.999999	0.447213	-1.00932	-0.52421	1.07231
2.04176	-1.78587	-0.561951	-1.47008	0.999999	-1.34164	-1.00932	0.766153	0.205561
-0.701608	0.718989	-0.561951	0.972512	-0.999999	0.447213	-1.00932	-1.16939	-1.11242
-0.228614	0.162352	-1.68585	0.972512	-0.999999	-0.447213	0.117362	-0.52421	-0.977544
-0.51241	0.44067	-1.1239	0.972512	-0.999999	0.447213	-1.00932	-1.16939	-1.15109
-1.1746	1.27562	0.561951	0.972512	-0.999999	1.34164	-1.76043	-1.81457	-1.16498
-0.985404	0.997307	0	0.972512	-0.999999	-0.447213	-1.00932	0.766153	-1.07969
-0.0394162	-0.115966	2.24781	-1.19868	0.999999	1.34164	0.117362	1.41134	1.42734
-0.51241	0.44067	-1.1239	0.972512	-0.999999	-0.447213	0.117362	0.766153	2.18354
-0.51241	0.44067	-1.1239	0.972512	-0.999999	-0.447213	1.24404	0.120972	-0.820854
-0.985404	0.997307	0	0.972512	-0.999999	1.34164	-1.00932	1.41134	-1.08762
-0.228614	0.162352	-1.68585	0.972512	-0.999999	-1.34164	1.24404	-1.16939	-0.772261
2.04176	-1.78587	-0.561951	-1.47008	0.999999	-1.34164	1.24404	0.766153	1.04554
-0.985404	0.997307	0	0.972512	-0.999999	-0.447213	1.24404	1.41134	-0.732593
1.28497	-1.22924	0	-1.19868	0.999999	0.447213	-1.00932	0.766153	4.07067
-0.228614	0.162352	-1.68585	0.972512	-0.999999	1.34164	0.117362	-1.16939	-0.977544
1.28497	-1.22924	0	-1.19868	0.999999	0.447213	-1.00932	-1.16939	0.677613
-0.985404	0.997307	0	0.972512	-0.999999	0.447213	0.117362	-1.16939	-0.906141
-0.701608	0.718989	-0.561951	0.972512	-0.999999	0.447213	-1.00932	1.41134	-1.11043
1.28497	-1.22924	0	-1.19868	0.999999	0.447213	1.24404	-1.16939	1.42338
-0.701608	0.718989	-0.561951	0.972512	-0.999999	-1.34164	-1.76043	-1.81457	6.97591
-1.1746	1.27562	0.561951	0.972512	-0.999999	0.447213	0.117362	-0.52421	5.96878
2.04176	-1.78587	-0.561951	-1.47008	0.999999	0.447213	1.24404	1.41134	0.982067
-0.228614	0.162352	-1.68585	0.972512	-0.999999	1.34164	0.117362	1.41134	-1.02019
0.24438	-0.394284	0.561951	-0.65588	0.999999	-1.34164	1.24404	1.41134	1.96386
1.28497	-1.22924	0	-1.19868	0.999999	-0.447213	-1.00932	1.41134	9.05365
0.24438	-0.394284	0.561951	-0.65588	0.999999	1.34164	1.24404	0.120972	1.96088
-1.3638	1.55394	1.1239	0.972512	-0.999999	0.447213	0.117362	-0.52421	-0.764327
0.24438	-0.394284	0.561951	-0.65588	0.999999	0.447213	1.24404	-0.52421	2.02633
-0.228614	0.162352	-1.68585	0.972512	-0.999999	0.447213	-1.00932	1.41134	6.94277
2.04176	-1.78587	-0.561951	-1.47008	0.999999	0.447213	-1.76043	-1.81457	-0.670115
-0.0394162	-0.115966	2.24781	-1.19868	0.999999	-1.34164	-1.00932	-0.52421	1.07628
-0.0394162	-0.115966	2.24781	-1.19868	0.999999	-0.447213	-1.76043	-1.81457	0.160935
-0.228614	0.162352	-1.68585	0.972512	-0.999999	1.34164	0.117362	-0.52421	-0.99242
-0.0394162	-0.115966	2.24781	-1.19868	0.999999	1.34164	0.117362	0.120972	1.40949
-1.1746	1.27562	0.561951	0.972512	-0.999999	1.34164	0.117362	-1.16939	-0.489625
0.528177	-0.672602	0	-0.65588	0.999999	0.447213	0.117362	1.41134	8.45526
-1.3638	1.55394	1.1239	0.972512	-0.999999	0.447213	-1.76043	-1.81457	5.41862
-0.51241	0.44067	-1.1239	0.972512	-0.999999	-1.34164	1.24404	1.41134	-0.979527
0.24438	-0.394284	0.561951	-0.65588	0.999999	-0.447213	1.24404	1.41134	1.94898
0.24438	-0.394284	0.561951	-0.65588	0.999999	-0.447213	0.117362	0.766153	1.63957
-0.51241	0.44067	-1.1239	0.972512	-0.999999	1.34164	-1.76043	-1.81457	-1.57753
-0.701608	0.718989	-0.561951	0.972512	-0.999999	0.447213	0.117362	-1.16939	-0.949776
-0.985404	0.997307	0	0.972512	-0.999999	1.34164	-1.76043	-1.81457	-1.50811
-0.0394162	-0.115966	2.24781	-1.19868	0.999999	-0.447213	-1.00932	1.41134	1.08124
-0.51241	0.44067	-1.1239	0.972512	-0.999999	1.34164	0.117362	-0.52421	-0.973577
-1.3638	1.55394	1.1239	0.972512	-0.999999	-0.447213	1.24404	1.41134	-0.581853
-0.51241	0.44067	-1.1239	0.972512	-0.999999	1.34164	1.24404	0.766153	-0.758377
0.528177	-0.672602	0	-0.65588	0.999999	-1.34164	0.117362	0.766153	0.3325
-0.985404	0.997307	0	0.972512	-0.999999	-0.447213	-1.00932	-0.52421	-1.07969
0.906572	-0.95092	-0.561951	-0.65588	0.999999	-1.34164	1.24404	-0.52421	1.00884
0.528177	-0.672602	0	-0.65588	0.999999	0.447213	1.24404	-0.52421	0.628028
0.528177	-0.672602	0	-0.65588	0.999999	-0.447213	-1.00932	-0.52421	0.190686
-0.985404	0.997307	0	0.972512	-0.999999	1.34164	-1.00932	-0.52421	-1.0787
1.28497	-1.22924	0	-1.19868	0.999999	0.447213	0.117362	0.766153	0.968183
-1.1746	1.27562	0.561951	0.972512	-0.999999	0.447213	0.117362	0.766153	-0.569953
-0.0394162	-0.115966	2.24781	-1.19868	0.999999	-1.34164	1.24404	1.41134	1.63758
-0.701608	0.718989	-0.561951	0.972512	-0.999999	1.34164	1.24404	0.766153	-0.753418
1.28497	-1.22924	0	-1.19868	0.999999	1.34164	-1.00932	-1.16939	7.6765
-0.701608	0.718989	-0.561951	0.972512	-0.999999	-0.447213	1.24404	-0.52421	6.4589
-0.0394162	-0.115966	2.24781	-1.19868	0.999999	0.447213	-1.00932	-1.16939	1.05446
-1.1746	1.27562	0.561951	0.972512	-0.999999	1.34164	0.117362	0.766153	-0.564003
-0.51241	0.44067	-1.1239	0.972512	-0.999999	1.34164	1.24404	-0.52421	-0.753418
-1.3638	1.55394	1.1239	0.972512	-0.999999	1.34164	0.117362	-0.52421	-0.764327
-1.3638	1.55394	1.1239	0.972512	-0.999999	-1.34164	0.117362	0.120972	-0.832755
-0.701608	0.718989	-0.561951	0.972512	-0.999999	0.447213	1.24404	0.120972	-0.791103
1.28497	-1.22924	0	-1.19868	0.999999	-0.447213	1.24404	0.120972	1.25379
0.528177	-0.672602	0	-0.65588	0.999999	1.34164	0.117362	-1.16939	0.38506
0.906572	-0.95092	-0.561951	-0.65588	0.999999	-0.447213	1.24404	1.41134	0.942399
-0.701608	0.718989	-0.561951	0.972512	-0.999999	-0.447213	-1.00932	1.41134	-1.10746
-1.3638	1.55394	1.1239	0.972512	-0.999999	1.34164	-1.76043	-1.81457	-1.36927
0.906572	-0.95092	-0.561951	-0.65588	0.999999	0.447213	-1.00932	-1.16939	0.402911
-1.1746	1.27562	0.561951	0.972512	-0.999999	1.34164	-1.00932	-0.52421	-0.705817
0.24438	-0.394284	0.561951	-0.65588	0.999999	-0.447213	-1.00932	0.766153	1.34701
0.528177	-0.672602	0	-0.65588	0.999999	0.447213	-1.00932	0.120972	0.184735
-1.1746	1.27562	0.561951	0.972512	-0.999999	-0.447213	-1.00932	-1.16939	-0.704825
1.28497	-1.22924	0	-1.19868	0.999999	-1.34164	-1.00932	0.766153	5.14772
-1.1746	1.27562	0.561951	0.972512	-0.999999	-1.34164	0.117362	1.41134	-0.553094
-0.228614	0.162352	-1.68585	0.972512	-0.999999	-0.447213	-1.00932	-0.52421	-1.17489
-1.1746	1.27562	0.561951	0.972512	-0.999999	-1.34164	1.24404	-1.16939	-0.276408
1.28497	-1.22924	0	-1.19868	0.999999	-1.34164	1.24404	1.41134	1.3252
-0.701608	0.718989	-0.561951	0.972512	-0.999999	-0.447213	1.24404	0.120972	8.20973
2.04176	-1.78587	-0.561951	-1.47008	0.999999	1.34164	0.117362	-0.52421	0.624061
-0.0394162	-0.115966	2.24781	-1.19868	0.999999	0.447213	1.24404	1.41134	1.68618
-0.0394162	-0.115966	2.24781	-1.19868	0.999999	1.34164	-1.00932	0.120972	1.08421
-0.51241	0.44067	-1.1239	0.972512	-0.999999	0.447213	-1.00932	0.120972	-1.15308
0.24438	-0.394284	0.561951	-0.65588	0.999999	-1.34164	1.24404	0.120972	9.21032
-0.228614	0.162352	-1.68585	0.972512	-0.999999	0.447213	0.117362	0.766153	-1.00432
-0.0394162	-0.115966	2.24781	-1.19868	0.999999	0.447213	0.117362	1.41134	1.36387
-0.228614	0.162352	-1.68585	0.972512	-0.999999	-0.447213	0.117362	0.766153	-0.99242
-0.51241	0.44067	-1.1239	0.972512	-0.999999	1.34164	-1.00932	1.41134	-0.854572
-0.985404	0.997307	0	0.972512	-0.999999	-1.34164	1.24404	0.766153	-0.690941
2.04176	-1.78587	-0.561951	-1.47008	0.999999	-1.34164	-1.00932	1.41134	0.202586
1.28497	-1.22924	0	-1.19868	0.999999	0.447213	1.24404	-0.52421	1.36387
-1.1746	1.27562	0.561951	0.972512	-0.999999	-0.447213	-1.00932	0.120972	-0.688958
2.04176	-1.78587	-0.561951	-1.47008	0.999999	-1.34164	1.24404	-1.16939	0.987026
-1.3638	1.55394	1.1239	0.972512	-0.999999	-0.447213	-1.00932	0.120972	-0.959693
-1.3638	1.55394	1.1239	0.972512	-0.999999	0.447213	-1.00932	0.120972	-0.95176
0.906572	-0.95092	-0.561951	-0.65588	0.999999	-0.447213	-1.00932	0.120972	0.412828
1.28497	-1.22924	0	-1.19868	0.999999	0.447213	1.24404	0.120972	1.26371
0.24438	-0.394284	0.561951	-0.65588	0.999999	-1.34164	0.117362	0.120972	1.6594
0.24438	-0.394284	0.561951	-0.65588	0.999999	-0.447213	-1.00932	0.120972	1.30635
-0.985404	0.997307	0	0.972512	-0.999999	-1.34164	-1.00932	0.120972	-1.06283
2.04176	-1.78587	-0.561951	-1.47008	0.999999	-1.34164	-1.00932	-1.16939	0.225395
2.04176	-1.78587	-0.561951	-1.47008	0.999999	1.34164	1.24404	1.41134	1.03364
-0.228614	0.162352	-1.68585	0.972512	-0.999999	-0.447213	1.24404	-1.16939	-0.763335
-0.0394162	-0.115966	2.24781	-1.19868	0.999999	1.34164	-1.76043	-1.81457	0.160935
0.24438	-0.394284	0.561951	-0.65588	0.999999	1.34164	1.24404	0.766153	2.04815
0.906572	-0.95092	-0.561951	-0.65588	0.999999	1.34164	1.24404	0.766153	1.03562
0.906572	-0.95092	-0.561951	-0.65588	0.999999	1.34164	-1.00932	0.766153	0.468363
-0.228614	0.162352	-1.68585	0.972512	-0.999999	1.34164	1.24404	-1.16939	-0.769286
-1.1746	1.27562	0.561951	0.972512	-0.999999	-0.447213	0.117362	1.41134	-0.540202
0.528177	-0.672602	0	-0.65588	0.999999	-0.447213	1.24404	-1.16939	0.753975
-0.228614	0.162352	-1.68585	0.972512	-0.999999	-0.447213	0.117362	0.120972	-1.0192
2.04176	-1.78587	-0.561951	-1.47008	0.999999	1.34164	1.24404	-1.16939	1.0138
-0.0394162	-0.115966	2.24781	-1.19868	0.999999	0.447213	-1.76043	-1.81457	0.244238
1.28497	-1.22924	0	-1.19868	0.999999	-1.34164	1.24404	0.120972	1.18338
0.528177	-0.672602	0	-0.65588	0.999999	0.447213	1.24404	-1.16939	0.71629
0.528177	-0.672602	0	-0.65588	0.999999	0.447213	-1.00932	1.41134	0.0577971
2.04176	-1.78587	-0.561951	-1.47008	0.999999	1.34164	-1.00932	0.766153	0.199611
0.528177	-0.672602	0	-0.65588	0.999999	0.447213	0.117362	0.766153	9.16513
-0.51241	0.44067	-1.1239	0.972512	-0.999999	1.34164	-1.00932	-0.52421	3.59361
-0.0394162	-0.115966	2.24781	-1.19868	0.999999	-0.447213	0.117362	1.41134	1.42139
-0.228614	0.162352	-1.68585	0.972512	-0.999999	-0.447213	0.117362	-1.16939	-0.972585
2.04176	-1.78587	-0.561951	-1.47008	0.999999	-1.34164	0.117362	0.120972	0.631003
1.28497	-1.22924	0	-1.19868	0.999999	1.34164	0.117362	0.766153	1.08818
-1.1746	1.27562	0.561951	0.972512	-0.999999	-1.34164	0.117362	-0.52421	-0.512434
0.528177	-0.672602	0	-0.65588	0.999999	-0.447213	-1.00932	0.120972	0.152009
-0.985404	0.997307	0	0.972512	-0.999999	0.447213	0.117362	0.120972	-0.948784
-1.3638	1.55394	1.1239	0.972512	-0.999999	-0.447213	-1.00932	0.766153	6.75707
-1.1746	1.27562	0.561951	0.972512	-0.999999	-1.34164	0.117362	0.766153	-0.527309
-1.1746	1.27562	0.561951	0.972512	-0.999999	1.34164	1.24404	1.41134	-0.439048
2.04176	-1.78587	-0.561951	-1.47008	0.999999	-0.447213	0.117362	0.120972	0.620094
1.28497	-1.22924	0	-1.19868	0.999999	0.447213	-1.76043	-1.81457	-0.158395
1.28497	-1.22924	0	-1.19868	0.999999	-0.447213	-1.76043	-1.81457	-0.0840169
2.04176	-1.78587	-0.561951	-1.47008	0.999999	-1.34164	-1.00932	0.120972	0.195644
-0.701608	0.718989	-0.561951	0.972512	-0.999999	-1.34164	1.24404	0.120972	-0.792095
-0.0394162	-0.115966	2.24781	-1.19868	0.999999	-0.447213	1.24404	-0.52421	1.76948
0.24438	-0.394284	0.561951	-0.65588	0.999999	-1.34164	1.24404	-0.52421	1.91725
-0.701608	0.718989	-0.561951	0.972512	-0.999999	-1.34164	1.24404	0.766153	-0.770277
0.906572	-0.95092	-0.561951	-0.65588	0.999999	1.34164	1.24404	1.41134	0.967191
-0.228614	0.162352	-1.68585	0.972512	-0.999999	-0.447213	-1.00932	0.120972	-1.18679
-0.228614	0.162352	-1.68585	0.972512	-0.999999	0.447213	1.24404	-0.52421	-0.805979
0.528177	-0.672602	0	-0.65588	0.999999	-0.447213	1.24404	1.41134	0.713315
-0.0394162	-0.115966	2.24781	-1.19868	0.999999	0.447213	-1.00932	1.41134	1.00686

## Sheet: Test
xt_0	xt_1	xt_2	xt_3	xt_4	xt_5	xt_6	xt_7	yt
-0.0394162	-0.115966	2.24781	-1.19868	0.999999	1.34164	-1.00932	-0.52421	1.0019
-0.0394162	-0.115966	2.24781	-1.19868	0.999999	-1.34164	-1.00932	0.766153	1.06835
-0.0394162	-0.115966	2.24781	-1.19868	0.999999	-0.447213	0.117362	0.766153	1.40255
-0.985404	0.997307	0	0.972512	-0.999999	-1.34164	-1.00932	1.41134	-1.08366
-1.1746	1.27562	0.561951	0.972512	-0.999999	-1.34164	-1.00932	-1.16939	-0.683999
-0.0394162	-0.115966	2.24781	-1.19868	0.999999	0.447213	0.117362	-1.16939	1.44817
-0.985404	0.997307	0	0.972512	-0.999999	0.447213	-1.00932	-1.16939	-1.05192
-0.701608	0.718989	-0.561951	0.972512	-0.999999	1.34164	-1.00932	0.766153	-1.10151
-1.1746	1.27562	0.561951	0.972512	-0.999999	0.447213	-1.00932	-1.16939	-0.683007
0.24438	-0.394284	0.561951	-0.65588	0.999999	1.34164	1.24404	-0.52421	1.94501
-0.985404	0.997307	0	0.972512	-0.999999	0.447213	1.24404	-1.16939	-0.70185
-1.1746	1.27562	0.561951	0.972512	-0.999999	0.447213	1.24404	0.120972	-0.379545
-0.228614	0.162352	-1.68585	0.972512	-0.999999	0.447213	1.24404	-1.16939	-0.774244
-1.1746	1.27562	0.561951	0.972512	-0.999999	0.447213	1.24404	0.766153	-0.327977
-0.51241	0.44067	-1.1239	0.972512	-0.999999	-0.447213	1.24404	0.766153	-0.75441
2.04176	-1.78587	-0.561951	-1.47008	0.999999	-0.447213	-1.00932	1.41134	0.200603
-1.3638	1.55394	1.1239	0.972512	-0.999999	-1.34164	-1.76043	-1.81457	-1.35935
-0.701608	0.718989	-0.561951	0.972512	-0.999999	1.34164	0.117362	1.41134	-0.975561
1.28497	-1.22924	0	-1.19868	0.999999	0.447213	0.117362	1.41134	0.914631
-0.985404	0.997307	0	0.972512	-0.999999	-1.34164	-1.00932	-1.16939	-1.05391
-0.228614	0.162352	-1.68585	0.972512	-0.999999	-0.447213	0.117362	1.41134	-1.0549
2.04176	-1.78587	-0.561951	-1.47008	0.999999	-1.34164	0.117362	-0.52421	0.631003
-0.51241	0.44067	-1.1239	0.972512	-0.999999	0.447213	1.24404	-1.16939	-0.774244
-0.0394162	-0.115966	2.24781	-1.19868	0.999999	1.34164	1.24404	0.766153	1.76551
1.28497	-1.22924	0	-1.19868	0.999999	0.447213	0.117362	-1.16939	1.04454
0.906572	-0.95092	-0.561951	-0.65588	0.999999	1.34164	-1.00932	1.41134	0.410844
2.04176	-1.78587	-0.561951	-1.47008	0.999999	0.447213	0.117362	1.41134	0.579434
-0.985404	0.997307	0	0.972512	-0.999999	-1.34164	1.24404	0.120972	-0.708792
0.906572	-0.95092	-0.561951	-0.65588	0.999999	1.34164	1.24404	-1.16939	0.89083
0.528177	-0.672602	0	-0.65588	0.999999	1.34164	-1.00932	0.766153	0.191677
0.906572	-0.95092	-0.561951	-0.65588	0.999999	0.447213	-1.00932	-0.52421	0.398944
-1.3638	1.55394	1.1239	0.972512	-0.999999	1.34164	0.117362	0.766153	-0.759369
-0.51241	0.44067	-1.1239	0.972512	-0.999999	-1.34164	-1.76043	-1.81457	-1.5805
0.906572	-0.95092	-0.561951	-0.65588	0.999999	-1.34164	0.117362	1.41134	0.734141
2.04176	-1.78587	-0.561951	-1.47008	0.999999	-0.447213	1.24404	0.766153	1.02769
-1.1746	1.27562	0.561951	0.972512	-0.999999	-0.447213	1.24404	1.41134	-0.408305
-1.3638	1.55394	1.1239	0.972512	-0.999999	-0.447213	0.117362	1.41134	-0.824821
-0.985404	0.997307	0	0.972512	-0.999999	1.34164	1.24404	0.766153	-0.694908
0.906572	-0.95092	-0.561951	-0.65588	0.999999	0.447213	0.117362	0.766153	0.671663
0.906572	-0.95092	-0.561951	-0.65588	0.999999	1.34164	0.117362	-0.52421	0.604227
-0.228614	0.162352	-1.68585	0.972512	-0.999999	-1.34164	0.117362	-1.16939	-0.979527
-0.51241	0.44067	-1.1239	0.972512	-0.999999	-0.447213	0.117362	1.41134	-1.00333
0.906572	-0.95092	-0.561951	-0.65588	0.999999	0.447213	0.117362	0.120972	0.706373
-0.51241	0.44067	-1.1239	0.972512	-0.999999	-1.34164	0.117362	1.41134	-0.995395
-0.0394162	-0.115966	2.24781	-1.19868	0.999999	-0.447213	-1.00932	0.120972	1.08818
-0.985404	0.997307	0	0.972512	-0.999999	-0.447213	1.24404	0.766153	-0.695899
-0.985404	0.997307	0	0.972512	-0.999999	1.34164	1.24404	-1.16939	-0.70185
-0.51241	0.44067	-1.1239	0.972512	-0.999999	0.447213	0.117362	0.766153	-1.00531
-0.51241	0.44067	-1.1239	0.972512	-0.999999	-0.447213	0.117362	-1.16939	-0.95771
0.906572	-0.95092	-0.561951	-0.65588	0.999999	1.34164	0.117362	0.120972	0.670671
1.28497	-1.22924	0	-1.19868	0.999999	1.34164	-1.00932	1.41134	0.665713
2.04176	-1.78587	-0.561951	-1.47008	0.999999	-1.34164	0.117362	0.766153	0.633978
2.04176	-1.78587	-0.561951	-1.47008	0.999999	1.34164	-1.00932	0.120972	0.202586
0.24438	-0.394284	0.561951	-0.65588	0.999999	-0.447213	1.24404	-0.52421	2.06203
0.528177	-0.672602	0	-0.65588	0.999999	-1.34164	0.117362	-1.16939	0.449521
0.528177	-0.672602	0	-0.65588	0.999999	-0.447213	-1.00932	1.41134	0.156968
-0.228614	0.162352	-1.68585	0.972512	-0.999999	0.447213	0.117362	1.41134	-1.05787
0.906572	-0.95092	-0.561951	-0.65588	0.999999	-1.34164	-1.00932	-0.52421	0.41382
-0.51241	0.44067	-1.1239	0.972512	-0.999999	-0.447213	-1.00932	-0.52421	-1.14911
0.24438	-0.394284	0.561951	-0.65588	0.999999	-1.34164	0.117362	1.41134	1.7437
-0.228614	0.162352	-1.68585	0.972512	-0.999999	0.447213	0.117362	-0.52421	-1.0063
-0.0394162	-0.115966	2.24781	-1.19868	0.999999	-1.34164	-1.76043	-1.81457	0.244238
0.24438	-0.394284	0.561951	-0.65588	0.999999	-0.447213	-1.00932	1.41134	1.42833
-0.51241	0.44067	-1.1239	0.972512	-0.999999	0.447213	-1.76043	-1.81457	-1.5809
-0.701608	0.718989	-0.561951	0.972512	-0.999999	-1.34164	1.24404	-0.52421	-0.749452
-0.701608	0.718989	-0.561951	0.972512	-0.999999	-1.34164	-1.00932	0.766153	-1.10349
0.906572	-0.95092	-0.561951	-0.65588	0.999999	-1.34164	1.24404	-1.16939	0.950332
0.24438	-0.394284	0.561951	-0.65588	0.999999	1.34164	0.117362	0.766153	1.76651
0.24438	-0.394284	0.561951	-0.65588	0.999999	-1.34164	1.24404	-1.16939	1.89344
-0.228614	0.162352	-1.68585	0.972512	-0.999999	-1.34164	-1.00932	1.41134	-1.1739
-0.228614	0.162352	-1.68585	0.972512	-0.999999	-0.447213	-1.00932	-1.16939	-1.17787
-0.701608	0.718989	-0.561951	0.972512	-0.999999	-1.34164	0.117362	0.766153	-0.931925
-1.3638	1.55394	1.1239	0.972512	-0.999999	-0.447213	1.24404	0.766153	-0.536235
1.28497	-1.22924	0	-1.19868	0.999999	-0.447213	0.117362	-1.16939	1.10801
-0.701608	0.718989	-0.561951	0.972512	-0.999999	-1.34164	-1.00932	1.41134	-1.10052
2.04176	-1.78587	-0.561951	-1.47008	0.999999	1.34164	-1.00932	-1.16939	0.226387
-0.228614	0.162352	-1.68585	0.972512	-0.999999	-1.34164	0.117362	1.41134	-1.01027

## Sheet: results
RMSE	MAE	NLP
1.42959	1.23409	1.19371
