# Supplementary material
Source: ML conference proceedings conference paper supplement (https://openreview.net/forum?id=Gl2nXRzclw)
Supplement: supplementary_material [file Energy_data_focused.xlsx]

## Sheet: Train
x_0	x_1	x_2	x_3	x_4	x_5	x_6	x_7	y
-1.1746	1.27562	0.561951	0.972512	-0.999999	-0.447213	-1.76043	-1.81457	-1.16696
0.24438	-0.394284	0.561951	-0.65588	0.999999	1.34164	0.117362	1.41134	1.62073
1.28497	-1.22924	0	-1.19868	0.999999	-1.34164	-1.00932	1.41134	0.746041
-0.0548606	-0.298674	-0.145271	-0.343169	0.999999	0.113193	-0.163486	0.319686	-2.20344
1.28497	-1.22924	0	-1.19868	0.999999	1.34164	-1.00932	-0.52421	0.554642
2.04176	-1.78587	-0.561951	-1.47008	0.999999	-0.447213	1.24404	1.41134	1.03264
-0.985404	0.997307	0	0.972512	-0.999999	-1.34164	1.24404	-0.52421	-0.690941
-0.701608	0.718989	-0.561951	0.972512	-0.999999	0.447213	-1.76043	-1.81457	-1.54083
0.161297	-0.102458	-0.189935	-0.595861	0.999999	0.232935	0.381127	0.0344741	-2.23049
-0.0633166	-0.291557	-0.0071086	-0.51644	0.999999	0.753244	0.559371	-0.117528	-2.19542
0.24438	-0.394284	0.561951	-0.65588	0.999999	-0.447213	-1.00932	-0.52421	1.48288
0.24438	-0.394284	0.561951	-0.65588	0.999999	-0.447213	-1.00932	-1.16939	1.46899
0.24438	-0.394284	0.561951	-0.65588	0.999999	-0.447213	1.24404	0.120972	1.88353
-0.381767	-0.447016	-0.165086	-0.614466	0.999999	0.794497	0.146978	-0.0163089	-2.18681
-1.1746	1.27562	0.561951	0.972512	-0.999999	-0.447213	0.117362	0.766153	-0.557061
0.528177	-0.672602	0	-0.65588	0.999999	1.34164	-1.00932	-0.52421	0.04788
0.176315	-0.0673455	0.163504	-0.430761	0.999999	0.763511	0.240582	0.20901	-2.18089
-1.1746	1.27562	0.561951	0.972512	-0.999999	-1.34164	-1.00932	1.41134	-0.708792
2.04176	-1.78587	-0.561951	-1.47008	0.999999	-0.447213	0.117362	0.766153	0.619103
0.24438	-0.394284	0.561951	-0.65588	0.999999	1.34164	-1.00932	1.41134	1.30635
-0.228614	0.162352	-1.68585	0.972512	-0.999999	-1.34164	-1.00932	0.120972	-1.18184
-1.3638	1.55394	1.1239	0.972512	-0.999999	-0.447213	0.117362	-0.52421	-0.758377
2.04176	-1.78587	-0.561951	-1.47008	0.999999	-1.34164	1.24404	1.41134	1.04454
-0.701608	0.718989	-0.561951	0.972512	-0.999999	-1.34164	-1.00932	-1.16939	-1.11043
1.28497	-1.22924	0	-1.19868	0.999999	-1.34164	0.117362	-1.16939	1.02868
0.528177	-0.672602	0	-0.65588	0.999999	0.447213	-1.00932	-0.52421	0.13515
2.04176	-1.78587	-0.561951	-1.47008	0.999999	1.34164	1.24404	-0.52421	1.03264
-1.1746	1.27562	0.561951	0.972512	-0.999999	0.447213	1.24404	-1.16939	-0.280375
0.125951	0.135333	-0.0888579	-0.784484	0.999999	0.281918	0.0252787	-0.0977269	-2.21895
1.28497	-1.22924	0	-1.19868	0.999999	0.447213	-1.00932	1.41134	0.567534
-0.0394162	-0.115966	2.24781	-1.19868	0.999999	0.447213	0.117362	0.120972	1.32222
-0.985404	0.997307	0	0.972512	-0.999999	0.447213	1.24404	-0.52421	-0.715734
0.906572	-0.95092	-0.561951	-0.65588	0.999999	0.447213	-1.00932	0.766153	0.398944
0.906572	-0.95092	-0.561951	-0.65588	0.999999	0.447213	-1.76043	-1.81457	-0.294259
0.24438	-0.394284	0.561951	-0.65588	0.999999	0.447213	1.24404	0.120972	2.00154
1.28497	-1.22924	0	-1.19868	0.999999	-0.447213	1.24404	-1.16939	1.4809
0.528177	-0.672602	0	-0.65588	0.999999	1.34164	1.24404	0.120972	0.654804
1.28497	-1.22924	0	-1.19868	0.999999	-0.447213	0.117362	0.120972	1.00091
1.28497	-1.22924	0	-1.19868	0.999999	-0.447213	1.24404	-0.52421	1.41445
0.1273	-0.0847586	0.0367047	-0.624355	0.999999	0.79338	-0.235141	-0.0124303	-2.2275
0.528177	-0.672602	0	-0.65588	0.999999	-0.447213	0.117362	1.41134	0.283906
1.28497	-1.22924	0	-1.19868	0.999999	-1.34164	-1.76043	-1.81457	-0.145503
0.108117	-0.371047	-0.170824	-0.979054	0.999999	0.339278	-0.0905275	0.13488	-2.16103
-0.701608	0.718989	-0.561951	0.972512	-0.999999	0.447213	0.117362	1.41134	-1.00432
-0.985404	0.997307	0	0.972512	-0.999999	-0.447213	-1.00932	1.41134	-1.08762
-1.3638	1.55394	1.1239	0.972512	-0.999999	-1.34164	-1.00932	-1.16939	-0.926967
-0.228614	0.162352	-1.68585	0.972512	-0.999999	0.447213	-1.00932	-0.52421	-1.18878
-0.0394162	-0.115966	2.24781	-1.19868	0.999999	1.34164	0.117362	-1.16939	1.40057
0.24438	-0.394284	0.561951	-0.65588	0.999999	-1.34164	-1.00932	0.766153	1.44321
2.04176	-1.78587	-0.561951	-1.47008	0.999999	1.34164	0.117362	1.41134	0.625053
0.146903	-0.12217	-0.189844	-0.789531	0.999999	0.647571	-0.0883451	0.337167	-2.16674
-0.0394162	-0.115966	2.24781	-1.19868	0.999999	-0.447213	1.24404	0.120972	1.73874
0.906572	-0.95092	-0.561951	-0.65588	0.999999	-1.34164	-1.00932	0.766153	0.409853
-0.985404	0.997307	0	0.972512	-0.999999	1.34164	-1.00932	-1.16939	-1.05291
0.24438	-0.394284	0.561951	-0.65588	0.999999	-0.447213	1.24404	0.766153	1.92617
-0.228614	0.162352	-1.68585	0.972512	-0.999999	-1.34164	1.24404	-0.52421	-0.770277
-0.0408796	-0.299077	-0.149186	-0.822686	0.999999	0.0932799	-0.047989	0.378314	-2.16469
-0.228614	0.162352	-1.68585	0.972512	-0.999999	0.447213	1.24404	0.120972	-0.813912
-1.1746	1.27562	0.561951	0.972512	-0.999999	0.447213	0.117362	1.41134	-0.550119
0.528177	-0.672602	0	-0.65588	0.999999	0.447213	-1.00932	-1.16939	0.122258
0.906572	-0.95092	-0.561951	-0.65588	0.999999	-1.34164	0.117362	0.120972	0.604227
-1.3638	1.55394	1.1239	0.972512	-0.999999	-1.34164	0.117362	-0.52421	-0.790112
-0.701608	0.718989	-0.561951	0.972512	-0.999999	-1.34164	-1.00932	0.120972	-1.09952
-1.3638	1.55394	1.1239	0.972512	-0.999999	0.447213	1.24404	1.41134	-0.577886
0.240072	-0.202733	-0.0688774	-0.41092	0.999999	0.509147	-0.186103	0.17419	-2.172
-0.701608	0.718989	-0.561951	0.972512	-0.999999	1.34164	-1.00932	-1.16939	-1.10547
-0.228614	0.162352	-1.68585	0.972512	-0.999999	-1.34164	0.117362	0.766153	-0.990436
0.528177	-0.672602	0	-0.65588	0.999999	-0.447213	1.24404	0.120972	0.730174
0.24438	-0.394284	0.561951	-0.65588	0.999999	-0.447213	1.24404	-1.16939	2.01443
-0.701608	0.718989	-0.561951	0.972512	-0.999999	0.447213	1.24404	0.766153	-0.771269
-0.228614	0.162352	-1.68585	0.972512	-0.999999	1.34164	0.117362	0.120972	-1.05291
-0.0394162	-0.115966	2.24781	-1.19868	0.999999	1.34164	-1.00932	1.41134	1.08719
-0.985404	0.997307	0	0.972512	-0.999999	-0.447213	-1.00932	0.120972	-1.06184
-0.51241	0.44067	-1.1239	0.972512	-0.999999	-0.447213	-1.00932	0.120972	-1.15308
-0.51241	0.44067	-1.1239	0.972512	-0.999999	-0.447213	1.24404	-0.52421	-0.758377
-0.985404	0.997307	0	0.972512	-0.999999	-0.447213	0.117362	0.766153	-0.923
-1.3638	1.55394	1.1239	0.972512	-0.999999	-1.34164	1.24404	0.766153	-0.581853
-1.3638	1.55394	1.1239	0.972512	-0.999999	1.34164	-1.00932	1.41134	-0.960685
0.906572	-0.95092	-0.561951	-0.65588	0.999999	-0.447213	0.117362	-1.16939	0.767859
-0.51241	0.44067	-1.1239	0.972512	-0.999999	-1.34164	1.24404	0.766153	-0.764327
2.04176	-1.78587	-0.561951	-1.47008	0.999999	-0.447213	-1.00932	0.766153	0.190686
-0.701608	0.718989	-0.561951	0.972512	-0.999999	1.34164	-1.00932	-0.52421	-1.07275
0.906572	-0.95092	-0.561951	-0.65588	0.999999	0.447213	1.24404	-0.52421	0.974133
0.528177	-0.672602	0	-0.65588	0.999999	-0.447213	-1.76043	-1.81457	-0.485658
0.132996	-0.42454	0.0855449	-0.638793	0.999999	0.349793	-0.160883	0.0452556	-2.20445
-0.985404	0.997307	0	0.972512	-0.999999	-1.34164	-1.00932	0.766153	-1.07771
0.0265777	-0.313319	-0.0899188	-0.356293	0.999999	0.634087	0.00501218	-0.0881024	-2.21221
-1.1746	1.27562	0.561951	0.972512	-0.999999	1.34164	1.24404	0.120972	-0.381529
-1.3638	1.55394	1.1239	0.972512	-0.999999	0.447213	0.117362	-1.16939	-0.716725
0.906572	-0.95092	-0.561951	-0.65588	0.999999	-1.34164	1.24404	0.766153	0.998926
-0.269411	-0.105645	0.0310503	-0.875258	0.999999	0.247626	-0.119975	-0.0648953	-2.19082
-0.0394162	-0.115966	2.24781	-1.19868	0.999999	-1.34164	1.24404	0.120972	1.68717
-0.228614	0.162352	-1.68585	0.972512	-0.999999	0.447213	-1.00932	0.766153	-1.21357
0.24438	-0.394284	0.561951	-0.65588	0.999999	0.447213	-1.00932	-0.52421	1.45412
-0.985404	0.997307	0	0.972512	-0.999999	0.447213	1.24404	1.41134	-0.732593
-0.33246	-0.130986	0.107036	-0.7005	0.999999	0.559516	0.13138	0.0872201	-2.185
0.528177	-0.672602	0	-0.65588	0.999999	0.447213	0.117362	-0.52421	0.304732
-0.985404	0.997307	0	0.972512	-0.999999	1.34164	0.117362	-0.52421	-0.923
-0.228614	0.162352	-1.68585	0.972512	-0.999999	1.34164	-1.00932	1.41134	-1.18184
0.906572	-0.95092	-0.561951	-0.65588	0.999999	-0.447213	-1.00932	1.41134	0.410844
0.528177	-0.672602	0	-0.65588	0.999999	-0.447213	0.117362	0.766153	0.26308
0.906572	-0.95092	-0.561951	-0.65588	0.999999	-1.34164	0.117362	-0.52421	0.697447
1.28497	-1.22924	0	-1.19868	0.999999	-0.447213	-1.00932	0.766153	0.569517
1.28497	-1.22924	0	-1.19868	0.999999	0.447213	0.117362	0.120972	1.02868
0.24438	-0.394284	0.561951	-0.65588	0.999999	0.447213	0.117362	0.766153	1.58899
2.04176	-1.78587	-0.561951	-1.47008	0.999999	0.447213	-1.00932	-1.16939	0.230354
-0.228614	0.162352	-1.68585	0.972512	-0.999999	-1.34164	1.24404	0.120972	-0.826805
-1.1746	1.27562	0.561951	0.972512	-0.999999	-1.34164	-1.00932	0.120972	-0.708792
-0.701608	0.718989	-0.561951	0.972512	-0.999999	-0.447213	0.117362	0.120972	-0.976552
2.04176	-1.78587	-0.561951	-1.47008	0.999999	0.447213	1.24404	-1.16939	1.00983
-0.228614	0.162352	-1.68585	0.972512	-0.999999	-0.447213	-1.76043	-1.81457	-1.61224
-0.985404	0.997307	0	0.972512	-0.999999	-0.447213	1.24404	-0.52421	-0.695899
1.28497	-1.22924	0	-1.19868	0.999999	-0.447213	1.24404	0.766153	1.33115
1.28497	-1.22924	0	-1.19868	0.999999	1.34164	1.24404	0.120972	1.18834
-1.3638	1.55394	1.1239	0.972512	-0.999999	-1.34164	-1.00932	0.766153	-0.937876
-0.0394162	-0.115966	2.24781	-1.19868	0.999999	1.34164	1.24404	1.41134	1.74072
1.28497	-1.22924	0	-1.19868	0.999999	-0.447213	-1.00932	0.120972	0.664721
1.28497	-1.22924	0	-1.19868	0.999999	-1.34164	1.24404	0.766153	1.40255
-1.1746	1.27562	0.561951	0.972512	-0.999999	-1.34164	-1.76043	-1.81457	-1.13622
0.0200804	0.148993	-0.0110654	-0.882587	0.999999	0.506419	-0.0677554	-0.0948683	-2.22064
0.211488	0.141176	-0.041871	-0.471981	0.999999	0.402334	-0.199144	0.0934547	-2.20412
0.24438	-0.394284	0.561951	-0.65588	0.999999	0.447213	0.117362	1.41134	1.65643
0.211327	0.206379	0.21312	-0.958004	0.999999	0.552281	-0.127815	-0.0307199	-2.16032
-0.0593427	-0.193555	0.00721376	-0.869318	0.999999	0.234346	-0.192825	-0.0128825	-2.19456
2.04176	-1.78587	-0.561951	-1.47008	0.999999	-0.447213	-1.00932	-0.52421	0.198619
0.187779	-0.191785	0.0310494	-0.637908	0.999999	0.659112	0.360934	0.120898	-2.20226
-0.0414755	-0.408681	-0.187115	-0.495251	0.999999	0.547535	0.13991	0.185497	-2.17133
1.28497	-1.22924	0	-1.19868	0.999999	1.34164	1.24404	1.41134	1.28255
0.24438	-0.394284	0.561951	-0.65588	0.999999	-1.34164	-1.00932	-1.16939	1.31429
-0.228614	0.162352	-1.68585	0.972512	-0.999999	1.34164	-1.00932	-1.16939	-1.18184
0.906572	-0.95092	-0.561951	-0.65588	0.999999	-1.34164	1.24404	0.120972	0.889838
0.24438	-0.394284	0.561951	-0.65588	0.999999	-1.34164	0.117362	0.766153	1.75461
-0.985404	0.997307	0	0.972512	-0.999999	1.34164	0.117362	0.766153	-0.930934
-0.51241	0.44067	-1.1239	0.972512	-0.999999	-1.34164	-1.00932	1.41134	-1.14316
-0.208406	0.014215	0.17655	-0.606849	0.999999	0.242404	-0.154115	-0.0280214	-2.21996
-0.0394162	-0.115966	2.24781	-1.19868	0.999999	-0.447213	-1.00932	0.766153	0.998926
1.28497	-1.22924	0	-1.19868	0.999999	1.34164	-1.00932	0.766153	0.742074
-0.51241	0.44067	-1.1239	0.972512	-0.999999	1.34164	-1.00932	0.766153	-1.14911
0.24438	-0.394284	0.561951	-0.65588	0.999999	0.447213	1.24404	0.766153	1.88551
-1.3638	1.55394	1.1239	0.972512	-0.999999	-1.34164	1.24404	-1.16939	-0.715734
-0.985404	0.997307	0	0.972512	-0.999999	-0.447213	0.117362	0.120972	-0.922008
-0.701608	0.718989	-0.561951	0.972512	-0.999999	0.447213	0.117362	-0.52421	-0.949776
0.528177	-0.672602	0	-0.65588	0.999999	-0.447213	-1.00932	0.766153	0.0488717
2.04176	-1.78587	-0.561951	-1.47008	0.999999	1.34164	-1.76043	-1.81457	-0.670115
-0.0584498	0.166878	0.0777266	-0.520977	0.999999	0.734787	0.0407857	-0.0576119	-2.1793
-1.3638	1.55394	1.1239	0.972512	-0.999999	-0.447213	-1.00932	-0.52421	-0.923
-1.3638	1.55394	1.1239	0.972512	-0.999999	-0.447213	-1.76043	-1.81457	-1.37026
-0.985404	0.997307	0	0.972512	-0.999999	-0.447213	-1.00932	-1.16939	-1.05291
0.24438	-0.394284	0.561951	-0.65588	0.999999	0.447213	0.117362	0.120972	1.73576
1.28497	-1.22924	0	-1.19868	0.999999	-1.34164	1.24404	-1.16939	1.40453
0.528177	-0.672602	0	-0.65588	0.999999	1.34164	1.24404	-1.16939	0.62902
0.528177	-0.672602	0	-0.65588	0.999999	-0.447213	0.117362	0.120972	0.314649
-0.0394162	-0.115966	2.24781	-1.19868	0.999999	1.34164	-1.00932	0.766153	0.991984
-0.228614	0.162352	-1.68585	0.972512	-0.999999	1.34164	1.24404	1.41134	-0.785153
2.04176	-1.78587	-0.561951	-1.47008	0.999999	1.34164	0.117362	0.766153	0.626045
0.00847535	0.167744	-0.0406297	-0.576647	0.999999	0.759856	0.385221	0.113379	-2.16508
-1.1746	1.27562	0.561951	0.972512	-0.999999	-1.34164	1.24404	0.766153	-0.322026
-0.0394162	-0.115966	2.24781	-1.19868	0.999999	0.447213	-1.00932	0.120972	0.993968
-1.3638	1.55394	1.1239	0.972512	-0.999999	0.447213	-1.00932	-1.16939	-0.929942
-1.1746	1.27562	0.561951	0.972512	-0.999999	-0.447213	0.117362	0.120972	-0.53326
0.528177	-0.672602	0	-0.65588	0.999999	1.34164	1.24404	-0.52421	0.565551
1.28497	-1.22924	0	-1.19868	0.999999	-0.447213	0.117362	1.41134	0.991984
-0.701608	0.718989	-0.561951	0.972512	-0.999999	1.34164	-1.00932	1.41134	-1.10547
1.28497	-1.22924	0	-1.19868	0.999999	-1.34164	-1.00932	-0.52421	0.651829
-1.1746	1.27562	0.561951	0.972512	-0.999999	-0.447213	-1.00932	0.766153	-0.705817
-0.300002	0.0538845	0.173509	-0.587675	0.999999	0.135154	0.401229	-0.128232	-2.20333
2.04176	-1.78587	-0.561951	-1.47008	0.999999	-1.34164	0.117362	1.41134	0.632987
0.24438	-0.394284	0.561951	-0.65588	0.999999	-0.447213	0.117362	-1.16939	1.75758
-0.701608	0.718989	-0.561951	0.972512	-0.999999	-0.447213	-1.00932	0.120972	-1.10547
-0.985404	0.997307	0	0.972512	-0.999999	1.34164	-1.00932	0.120972	-1.06085
0.906572	-0.95092	-0.561951	-0.65588	0.999999	1.34164	-1.00932	-0.52421	0.302748
-0.985404	0.997307	0	0.972512	-0.999999	1.34164	1.24404	-0.52421	-0.694908
2.04176	-1.78587	-0.561951	-1.47008	0.999999	0.447213	0.117362	-1.16939	0.601252
2.04176	-1.78587	-0.561951	-1.47008	0.999999	1.34164	0.117362	0.120972	0.627036
-0.51241	0.44067	-1.1239	0.972512	-0.999999	-1.34164	-1.00932	-0.52421	-1.15704
-0.51241	0.44067	-1.1239	0.972512	-0.999999	-1.34164	-1.00932	-1.16939	-1.1501
-1.3638	1.55394	1.1239	0.972512	-0.999999	1.34164	-1.00932	0.766153	-0.923
0.24438	-0.394284	0.561951	-0.65588	0.999999	0.447213	-1.00932	1.41134	1.43429
-0.701608	0.718989	-0.561951	0.972512	-0.999999	-1.34164	0.117362	-0.52421	-0.937876
2.04176	-1.78587	-0.561951	-1.47008	0.999999	0.447213	1.24404	-0.52421	0.985042
0.0782722	-0.139449	0.0912532	-0.556979	0.999999	0.245311	0.382644	0.287349	-2.20865
-0.51241	0.44067	-1.1239	0.972512	-0.999999	0.447213	0.117362	-0.52421	-1.00234
0.528177	-0.672602	0	-0.65588	0.999999	-1.34164	0.117362	0.120972	0.237296
-1.1746	1.27562	0.561951	0.972512	-0.999999	-0.447213	-1.00932	-0.52421	-0.706808
0.24438	-0.394284	0.561951	-0.65588	0.999999	1.34164	-1.00932	0.120972	1.42734
-0.0394162	-0.115966	2.24781	-1.19868	0.999999	-1.34164	1.24404	-1.16939	1.83196
0.103088	0.0326041	-0.149791	-0.935684	0.999999	0.637919	-0.110927	0.315638	-2.16462
-0.701608	0.718989	-0.561951	0.972512	-0.999999	-0.447213	0.117362	0.766153	-0.927959
2.04176	-1.78587	-0.561951	-1.47008	0.999999	-1.34164	1.24404	-0.52421	1.04256
1.28497	-1.22924	0	-1.19868	0.999999	0.447213	-1.00932	-0.52421	0.64687
-1.1746	1.27562	0.561951	0.972512	-0.999999	0.447213	0.117362	0.120972	-0.560036
-0.228614	0.162352	-1.68585	0.972512	-0.999999	0.447213	-1.00932	-1.16939	-1.18481
-0.51241	0.44067	-1.1239	0.972512	-0.999999	1.34164	0.117362	0.766153	-0.994403
-1.1746	1.27562	0.561951	0.972512	-0.999999	1.34164	1.24404	0.766153	-0.343844
-0.0394162	-0.115966	2.24781	-1.19868	0.999999	-1.34164	-1.00932	0.120972	1.01281
2.04176	-1.78587	-0.561951	-1.47008	0.999999	-1.34164	-1.76043	-1.81457	-0.670115
-1.1746	1.27562	0.561951	0.972512	-0.999999	-0.447213	1.24404	0.120972	-0.356736
0.906572	-0.95092	-0.561951	-0.65588	0.999999	-1.34164	-1.00932	0.120972	0.307707
-1.3638	1.55394	1.1239	0.972512	-0.999999	-0.447213	0.117362	-1.16939	-0.712758
-1.3638	1.55394	1.1239	0.972512	-0.999999	1.34164	0.117362	-1.16939	-0.708792
-1.1746	1.27562	0.561951	0.972512	-0.999999	0.447213	-1.00932	-0.52421	-0.690941
-0.0708584	-0.125831	-0.117632	-0.735524	0.999999	0.340569	0.297393	-0.0922962	-2.1569
1.28497	-1.22924	0	-1.19868	0.999999	-1.34164	0.117362	-0.52421	1.00686
-0.51241	0.44067	-1.1239	0.972512	-0.999999	-1.34164	-1.00932	0.120972	-1.14415
-0.0394162	-0.115966	2.24781	-1.19868	0.999999	-0.447213	1.24404	-1.16939	1.75163
-1.3638	1.55394	1.1239	0.972512	-0.999999	1.34164	0.117362	0.120972	-0.824821
-1.1746	1.27562	0.561951	0.972512	-0.999999	-1.34164	0.117362	0.120972	-0.543177
-0.0394162	-0.115966	2.24781	-1.19868	0.999999	-0.447213	0.117362	0.120972	1.41643
-1.3638	1.55394	1.1239	0.972512	-0.999999	0.447213	1.24404	0.120972	-0.570945
-0.51241	0.44067	-1.1239	0.972512	-0.999999	-0.447213	1.24404	1.41134	-0.959693
0.906572	-0.95092	-0.561951	-0.65588	0.999999	-0.447213	0.117362	0.120972	0.703398
-0.51241	0.44067	-1.1239	0.972512	-0.999999	1.34164	1.24404	1.41134	-0.980519
-0.985404	0.997307	0	0.972512	-0.999999	0.447213	1.24404	0.766153	-0.715734
-0.0394162	-0.115966	2.24781	-1.19868	0.999999	1.34164	0.117362	0.766153	1.38371
0.528177	-0.672602	0	-0.65588	0.999999	0.447213	1.24404	0.120972	0.71034
0.906572	-0.95092	-0.561951	-0.65588	0.999999	-1.34164	-1.00932	-1.16939	0.393985
-0.228614	0.162352	-1.68585	0.972512	-0.999999	-0.447213	1.24404	-0.52421	-0.779203
1.28497	-1.22924	0	-1.19868	0.999999	1.34164	1.24404	-1.16939	1.35396
-0.228614	0.162352	-1.68585	0.972512	-0.999999	-1.34164	0.117362	-0.52421	-0.987461
1.28497	-1.22924	0	-1.19868	0.999999	-1.34164	0.117362	0.766153	1.02769
-0.228614	0.162352	-1.68585	0.972512	-0.999999	0.447213	-1.76043	-1.81457	-1.6162
-0.701608	0.718989	-0.561951	0.972512	-0.999999	1.34164	0.117362	-1.16939	-0.950768
0.906572	-0.95092	-0.561951	-0.65588	0.999999	-0.447213	0.117362	0.766153	0.606211
2.04176	-1.78587	-0.561951	-1.47008	0.999999	0.447213	-1.00932	-0.52421	0.180769
-0.701608	0.718989	-0.561951	0.972512	-0.999999	-0.447213	-1.00932	-1.16939	-1.10845
-1.1746	1.27562	0.561951	0.972512	-0.999999	0.447213	0.117362	-1.16939	-0.474749
0.126034	-0.210822	-0.140644	-0.587903	0.999999	0.431744	0.276339	0.172026	-2.1769
0.24438	-0.394284	0.561951	-0.65588	0.999999	1.34164	0.117362	0.120972	1.73775
-1.1746	1.27562	0.561951	0.972512	-0.999999	0.447213	1.24404	-0.52421	-0.337894
-0.51241	0.44067	-1.1239	0.972512	-0.999999	1.34164	1.24404	-1.16939	-0.766311
2.04176	-1.78587	-0.561951	-1.47008	0.999999	-0.447213	0.117362	-0.52421	0.621086
-0.0394162	-0.115966	2.24781	-1.19868	0.999999	1.34164	-1.00932	-1.16939	0.982067
0.24438	-0.394284	0.561951	-0.65588	0.999999	1.34164	-1.00932	-0.52421	1.3609
-0.51241	0.44067	-1.1239	0.972512	-0.999999	0.447213	1.24404	0.120972	-0.82978
-0.985404	0.997307	0	0.972512	-0.999999	-1.34164	0.117362	-1.16939	-0.906141
-0.51241	0.44067	-1.1239	0.972512	-0.999999	-1.34164	1.24404	-0.52421	-0.75441
-0.701608	0.718989	-0.561951	0.972512	-0.999999	1.34164	-1.00932	0.120972	-1.10746
-0.0394162	-0.115966	2.24781	-1.19868	0.999999	-1.34164	1.24404	-0.52421	1.83196
1.28497	-1.22924	0	-1.19868	0.999999	-0.447213	1.24404	1.41134	1.25974
-0.51241	0.44067	-1.1239	0.972512	-0.999999	1.34164	-1.00932	0.120972	-1.15109
-0.701608	0.718989	-0.561951	0.972512	-0.999999	0.447213	0.117362	0.766153	-0.955726
-0.51241	0.44067	-1.1239	0.972512	-0.999999	1.34164	1.24404	0.120972	-0.837713
-1.3638	1.55394	1.1239	0.972512	-0.999999	0.447213	1.24404	-0.52421	-0.500533
-0.701608	0.718989	-0.561951	0.972512	-0.999999	1.34164	1.24404	0.120972	-0.815896
1.28497	-1.22924	0	-1.19868	0.999999	-0.447213	0.117362	0.766153	0.930498
0.528177	-0.672602	0	-0.65588	0.999999	1.34164	-1.00932	1.41134	0.153993
1.28497	-1.22924	0	-1.19868	0.999999	-0.447213	-1.00932	-0.52421	0.731165
2.04176	-1.78587	-0.561951	-1.47008	0.999999	-0.447213	1.24404	-1.16939	0.987026
0.906572	-0.95092	-0.561951	-0.65588	0.999999	0.447213	-1.00932	1.41134	0.302748
0.24438	-0.394284	0.561951	-0.65588	0.999999	0.447213	-1.00932	-1.16939	1.44718
-1.3638	1.55394	1.1239	0.972512	-0.999999	1.34164	-1.00932	0.120972	-0.949776
0.906572	-0.95092	-0.561951	-0.65588	0.999999	-0.447213	-1.00932	0.766153	0.30374
1.28497	-1.22924	0	-1.19868	0.999999	1.34164	-1.00932	0.120972	0.668688
0.24438	-0.394284	0.561951	-0.65588	0.999999	1.34164	1.24404	1.41134	1.83295
-1.3638	1.55394	1.1239	0.972512	-0.999999	-0.447213	-1.00932	-1.16939	-0.925975
-0.228614	0.162352	-1.68585	0.972512	-0.999999	1.34164	1.24404	0.120972	-0.845647
0.528177	-0.672602	0	-0.65588	0.999999	1.34164	0.117362	0.766153	0.366218
-1.3638	1.55394	1.1239	0.972512	-0.999999	0.447213	-1.00932	0.766153	-0.923
2.04176	-1.78587	-0.561951	-1.47008	0.999999	-1.34164	0.117362	-1.16939	0.579434
-0.228614	0.162352	-1.68585	0.972512	-0.999999	1.34164	-1.00932	-0.52421	-1.17589
0.906572	-0.95092	-0.561951	-0.65588	0.999999	1.34164	-1.00932	0.120972	0.411836
2.04176	-1.78587	-0.561951	-1.47008	0.999999	1.34164	-1.00932	-0.52421	0.192669
-1.3638	1.55394	1.1239	0.972512	-0.999999	-1.34164	-1.00932	1.41134	-0.96366
-0.151615	0.115528	-0.049788	-0.500324	0.999999	0.302904	-0.0649976	0.339611	-2.16731
0.528177	-0.672602	0	-0.65588	0.999999	-1.34164	1.24404	0.120972	0.631003
0.187792	-0.399888	0.146001	-0.901879	0.999999	0.787325	-2.7131e-05	-8.97064e-05	-2.22978
0.24438	-0.394284	0.561951	-0.65588	0.999999	0.447213	0.117362	-0.52421	1.75163
0.906572	-0.95092	-0.561951	-0.65588	0.999999	1.34164	0.117362	-1.16939	0.630011
-1.3638	1.55394	1.1239	0.972512	-0.999999	-0.447213	1.24404	-1.16939	-0.509459
0.24438	-0.394284	0.561951	-0.65588	0.999999	-1.34164	1.24404	0.766153	2.02931
0.285349	0.214062	-0.0174216	-0.658624	0.999999	0.512421	0.0728124	0.145791	-2.22672
-0.701608	0.718989	-0.561951	0.972512	-0.999999	1.34164	0.117362	-0.52421	-0.927959
-1.1746	1.27562	0.561951	0.972512	-0.999999	-0.447213	1.24404	0.766153	-0.315084
0.528177	-0.672602	0	-0.65588	0.999999	-1.34164	-1.00932	0.766153	0.148042
-0.200363	0.0904811	0.187711	-0.679527	0.999999	0.67648	-0.279776	-0.0421275	-2.18669
-0.701608	0.718989	-0.561951	0.972512	-0.999999	1.34164	1.24404	1.41134	-0.803004
-0.51241	0.44067	-1.1239	0.972512	-0.999999	-0.447213	0.117362	-0.52421	-0.993411
-1.1746	1.27562	0.561951	0.972512	-0.999999	-1.34164	1.24404	-0.52421	-0.308142
0.24438	-0.394284	0.561951	-0.65588	0.999999	-0.447213	0.117362	1.41134	1.73775
0.906572	-0.95092	-0.561951	-0.65588	0.999999	-1.34164	-1.00932	1.41134	0.468363
-0.0122521	0.215545	0.0850909	-0.680964	0.999999	0.132007	0.219482	0.244309	-2.1784
-0.985404	0.997307	0	0.972512	-0.999999	0.447213	-1.00932	0.766153	-1.08862
0.24438	-0.394284	0.561951	-0.65588	0.999999	1.34164	0.117362	-1.16939	1.6594
0.528177	-0.672602	0	-0.65588	0.999999	0.447213	1.24404	0.766153	0.628028
-1.1746	1.27562	0.561951	0.972512	-0.999999	1.34164	0.117362	1.41134	-0.534251
-0.332301	-0.247546	0.0607015	-0.76302	0.999999	0.244616	0.310812	0.284921	-2.21948
0.528177	-0.672602	0	-0.65588	0.999999	1.34164	0.117362	1.41134	0.315641
-1.1746	1.27562	0.561951	0.972512	-0.999999	1.34164	-1.00932	-1.16939	-0.703833
-0.701608	0.718989	-0.561951	0.972512	-0.999999	0.447213	-1.00932	0.766153	-1.1144
0.219559	-0.299686	0.178798	-0.424242	0.999999	0.533717	-0.222847	0.323571	-2.18213
-0.51241	0.44067	-1.1239	0.972512	-0.999999	-1.34164	0.117362	0.120972	-0.981511
0.528177	-0.672602	0	-0.65588	0.999999	-0.447213	1.24404	0.766153	0.569517
-1.3638	1.55394	1.1239	0.972512	-0.999999	-1.34164	-1.00932	0.120972	-0.954735
0.226135	0.159999	0.134974	-0.355115	0.999999	0.795708	-0.0589489	0.209646	-2.18787
-0.985404	0.997307	0	0.972512	-0.999999	-0.447213	-1.76043	-1.81457	-1.50811
2.04176	-1.78587	-0.561951	-1.47008	0.999999	0.447213	-1.00932	0.766153	0.171843
1.28497	-1.22924	0	-1.19868	0.999999	1.34164	-1.76043	-1.81457	-0.260541
0.906572	-0.95092	-0.561951	-0.65588	0.999999	0.447213	0.117362	-0.52421	0.690506
-1.1746	1.27562	0.561951	0.972512	-0.999999	-1.34164	1.24404	0.120972	-0.379545
-1.3638	1.55394	1.1239	0.972512	-0.999999	1.34164	0.117362	1.41134	-0.837713
-0.0394162	-0.115966	2.24781	-1.19868	0.999999	0.447213	-1.00932	0.766153	1.06934
-0.0394162	-0.115966	2.24781	-1.19868	0.999999	-0.447213	0.117362	-0.52421	1.38569
-0.51241	0.44067	-1.1239	0.972512	-0.999999	-1.34164	0.117362	-1.16939	-0.965643
-0.231639	0.0457414	0.00248592	-0.837798	0.999999	0.45911	0.00119584	0.297529	-2.1995
-0.985404	0.997307	0	0.972512	-0.999999	1.34164	1.24404	1.41134	-0.708792
0.214999	-0.0591881	-0.165306	-0.538682	0.999999	0.386129	0.231033	0.0235776	-2.16104
-0.985404	0.997307	0	0.972512	-0.999999	0.447213	0.117362	-0.52421	-0.945809
-0.51241	0.44067	-1.1239	0.972512	-0.999999	0.447213	-1.00932	1.41134	-1.15407
0.906572	-0.95092	-0.561951	-0.65588	0.999999	-0.447213	0.117362	1.41134	0.672655
0.528177	-0.672602	0	-0.65588	0.999999	-0.447213	-1.00932	-1.16939	0.170852
0.190757	-0.141498	-0.18685	-0.813369	0.999999	0.62656	0.297372	0.121338	-2.1705
-0.228614	0.162352	-1.68585	0.972512	-0.999999	-0.447213	1.24404	0.766153	-0.776228
-0.985404	0.997307	0	0.972512	-0.999999	-1.34164	-1.00932	-0.52421	-1.07671
2.04176	-1.78587	-0.561951	-1.47008	0.999999	1.34164	1.24404	0.766153	1.03463
-0.701608	0.718989	-0.561951	0.972512	-0.999999	1.34164	0.117362	0.120972	-1.01027
-0.0394162	-0.115966	2.24781	-1.19868	0.999999	-0.447213	-1.00932	-1.16939	0.973142
-0.0394162	-0.115966	2.24781	-1.19868	0.999999	-1.34164	1.24404	0.766153	1.82204
0.906572	-0.95092	-0.561951	-0.65588	0.999999	-0.447213	-1.00932	-0.52421	0.467372
0.906572	-0.95092	-0.561951	-0.65588	0.999999	0.447213	1.24404	1.41134	0.873971
1.28497	-1.22924	0	-1.19868	0.999999	0.447213	-1.00932	0.120972	0.725215
0.528177	-0.672602	0	-0.65588	0.999999	-1.34164	1.24404	1.41134	0.7629
-0.51241	0.44067	-1.1239	0.972512	-0.999999	0.447213	0.117362	-1.16939	-0.965643
-0.228614	0.162352	-1.68585	0.972512	-0.999999	-0.447213	1.24404	0.120972	-0.802012
0.906572	-0.95092	-0.561951	-0.65588	0.999999	0.447213	-1.00932	0.120972	0.454479
-0.228614	0.162352	-1.68585	0.972512	-0.999999	-0.447213	1.24404	1.41134	-0.804987
-0.985404	0.997307	0	0.972512	-0.999999	1.34164	1.24404	0.120972	-0.734576
-0.0394162	-0.115966	2.24781	-1.19868	0.999999	0.447213	1.24404	-1.16939	1.82502
2.04176	-1.78587	-0.561951	-1.47008	0.999999	-0.447213	-1.00932	0.120972	0.207545
-1.1746	1.27562	0.561951	0.972512	-0.999999	-1.34164	-1.00932	-0.52421	-0.683999
-0.51241	0.44067	-1.1239	0.972512	-0.999999	-0.447213	-1.00932	0.766153	-1.15308
0.24438	-0.394284	0.561951	-0.65588	0.999999	-0.447213	0.117362	-0.52421	1.77345
-1.3638	1.55394	1.1239	0.972512	-0.999999	-0.447213	0.117362	0.766153	-0.763335
-0.0394162	-0.115966	2.24781	-1.19868	0.999999	-0.447213	1.24404	0.766153	1.79427
2.04176	-1.78587	-0.561951	-1.47008	0.999999	-0.447213	0.117362	1.41134	0.622078
-0.985404	0.997307	0	0.972512	-0.999999	-0.447213	1.24404	0.120972	-0.706808
-0.51241	0.44067	-1.1239	0.972512	-0.999999	-0.447213	-1.00932	1.41134	-1.15109
1.28497	-1.22924	0	-1.19868	0.999999	-1.34164	-1.00932	-1.16939	0.666705
0.528177	-0.672602	0	-0.65588	0.999999	1.34164	-1.00932	0.120972	0.154984
1.28497	-1.22924	0	-1.19868	0.999999	0.447213	1.24404	0.766153	1.29842
1.28497	-1.22924	0	-1.19868	0.999999	0.447213	0.117362	-0.52421	0.993968
-0.228614	0.162352	-1.68585	0.972512	-0.999999	1.34164	0.117362	0.766153	-0.979527
0.24438	-0.394284	0.561951	-0.65588	0.999999	-0.447213	0.117362	0.120972	1.59097
0.528177	-0.672602	0	-0.65588	0.999999	-1.34164	0.117362	1.41134	0.336466
0.906572	-0.95092	-0.561951	-0.65588	0.999999	-0.447213	-1.76043	-1.81457	-0.233764
-0.0394162	-0.115966	2.24781	-1.19868	0.999999	-1.34164	0.117362	0.120972	1.35693
1.28497	-1.22924	0	-1.19868	0.999999	1.34164	0.117362	1.41134	1.00686
-0.51241	0.44067	-1.1239	0.972512	-0.999999	-1.34164	0.117362	0.766153	-0.986469
0.906572	-0.95092	-0.561951	-0.65588	0.999999	0.447213	0.117362	1.41134	0.595302
0.24438	-0.394284	0.561951	-0.65588	0.999999	-1.34164	-1.00932	-0.52421	1.32321
0.906572	-0.95092	-0.561951	-0.65588	0.999999	-0.447213	1.24404	-0.52421	1.03463
0.906572	-0.95092	-0.561951	-0.65588	0.999999	-0.447213	0.117362	-0.52421	0.750008
-0.228614	0.162352	-1.68585	0.972512	-0.999999	0.447213	1.24404	0.766153	-0.792095
-0.228614	0.162352	-1.68585	0.972512	-0.999999	0.447213	1.24404	1.41134	-0.806971
2.04176	-1.78587	-0.561951	-1.47008	0.999999	-0.447213	1.24404	0.120972	1.02967
0.906572	-0.95092	-0.561951	-0.65588	0.999999	-0.447213	1.24404	-1.16939	0.999918
-0.228614	0.162352	-1.68585	0.972512	-0.999999	-1.34164	-1.00932	0.766153	-1.21258
0.528177	-0.672602	0	-0.65588	0.999999	0.447213	-1.00932	0.766153	0.127217
-0.701608	0.718989	-0.561951	0.972512	-0.999999	0.447213	-1.00932	-0.52421	-1.08961
-0.985404	0.997307	0	0.972512	-0.999999	1.34164	0.117362	1.41134	-0.921017
0.140742	-0.309421	-0.0766141	-0.668362	0.999999	0.637242	0.0968712	-0.0597181	-2.1819
1.28497	-1.22924	0	-1.19868	0.999999	-0.447213	-1.00932	-1.16939	0.750008
0.528177	-0.672602	0	-0.65588	0.999999	-1.34164	-1.00932	-0.52421	0.143084
-0.985404	0.997307	0	0.972512	-0.999999	1.34164	0.117362	-1.16939	-0.905149
0.528177	-0.672602	0	-0.65588	0.999999	-1.34164	1.24404	-1.16939	0.685547
2.04176	-1.78587	-0.561951	-1.47008	0.999999	-1.34164	1.24404	0.120972	1.04256
0.528177	-0.672602	0	-0.65588	0.999999	-1.34164	-1.00932	-1.16939	0.121266
-0.51241	0.44067	-1.1239	0.972512	-0.999999	-1.34164	0.117362	-0.52421	-0.989444
-0.51241	0.44067	-1.1239	0.972512	-0.999999	0.447213	-1.00932	-0.52421	-1.16597
-0.985404	0.997307	0	0.972512	-0.999999	-0.447213	0.117362	-1.16939	-0.905149
0.906572	-0.95092	-0.561951	-0.65588	0.999999	0.447213	0.117362	-1.16939	0.723232
-1.1746	1.27562	0.561951	0.972512	-0.999999	1.34164	-1.00932	1.41134	-0.688958
0.528177	-0.672602	0	-0.65588	0.999999	0.447213	1.24404	1.41134	0.66968
-1.3638	1.55394	1.1239	0.972512	-0.999999	-1.34164	0.117362	0.766153	-0.791103
-1.1746	1.27562	0.561951	0.972512	-0.999999	0.447213	1.24404	1.41134	-0.41128
-0.51241	0.44067	-1.1239	0.972512	-0.999999	0.447213	1.24404	-0.52421	-0.784161
-0.701608	0.718989	-0.561951	0.972512	-0.999999	0.447213	1.24404	1.41134	-0.787136
-1.3638	1.55394	1.1239	0.972512	-0.999999	-1.34164	1.24404	0.120972	-0.578878
0.906572	-0.95092	-0.561951	-0.65588	0.999999	1.34164	-1.00932	-1.16939	0.293823
-0.985404	0.997307	0	0.972512	-0.999999	1.34164	0.117362	0.120972	-0.938867
0.24438	-0.394284	0.561951	-0.65588	0.999999	1.34164	-1.00932	0.766153	1.46701
2.04176	-1.78587	-0.561951	-1.47008	0.999999	0.447213	0.117362	0.766153	0.579434
-1.3638	1.55394	1.1239	0.972512	-0.999999	-0.447213	1.24404	-0.52421	-0.503509
-0.985404	0.997307	0	0.972512	-0.999999	-0.447213	0.117362	1.41134	-0.940851
-0.0394162	-0.115966	2.24781	-1.19868	0.999999	-1.34164	0.117362	1.41134	1.32718
2.04176	-1.78587	-0.561951	-1.47008	0.999999	1.34164	1.24404	0.120972	1.03562
0.209139	0.0433417	0.00638762	-0.358088	0.999999	0.587606	0.270233	0.107491	-2.1958
-0.0394162	-0.115966	2.24781	-1.19868	0.999999	-0.447213	0.117362	-1.16939	1.37082
-0.0394162	-0.115966	2.24781	-1.19868	0.999999	-1.34164	-1.00932	-1.16939	1.05645
1.28497	-1.22924	0	-1.19868	0.999999	1.34164	0.117362	-0.52421	0.927523
-0.228614	0.162352	-1.68585	0.972512	-0.999999	-1.34164	0.117362	0.120972	-1.042
-0.0394162	-0.115966	2.24781	-1.19868	0.999999	1.34164	0.117362	-0.52421	1.40255
0.528177	-0.672602	0	-0.65588	0.999999	-1.34164	-1.00932	1.41134	0.20457
-0.228614	0.162352	-1.68585	0.972512	-0.999999	1.34164	1.24404	-0.52421	-0.774244
2.04176	-1.78587	-0.561951	-1.47008	0.999999	-0.447213	0.117362	-1.16939	0.579434
-0.28334	0.198609	0.180363	-0.413671	0.999999	0.503936	-0.166099	0.0122602	-2.18134
2.04176	-1.78587	-0.561951	-1.47008	0.999999	0.447213	0.117362	0.120972	0.581418
0.906572	-0.95092	-0.561951	-0.65588	0.999999	-0.447213	1.24404	0.120972	0.973142
-0.985404	0.997307	0	0.972512	-0.999999	0.447213	-1.00932	1.41134	-1.09952
-1.3638	1.55394	1.1239	0.972512	-0.999999	-1.34164	0.117362	1.41134	-0.855564
-0.701608	0.718989	-0.561951	0.972512	-0.999999	0.447213	1.24404	-0.52421	-0.791103
-0.701608	0.718989	-0.561951	0.972512	-0.999999	-0.447213	-1.00932	-0.52421	-1.07572
0.528177	-0.672602	0	-0.65588	0.999999	-1.34164	0.117362	-0.52421	0.340433
-0.51241	0.44067	-1.1239	0.972512	-0.999999	0.447213	1.24404	0.766153	-0.777219
2.04176	-1.78587	-0.561951	-1.47008	0.999999	-0.447213	1.24404	-0.52421	1.03165
-0.701608	0.718989	-0.561951	0.972512	-0.999999	-0.447213	-1.76043	-1.81457	-1.53885
-1.1746	1.27562	0.561951	0.972512	-0.999999	1.34164	-1.00932	0.120972	-0.688958
-1.3638	1.55394	1.1239	0.972512	-0.999999	0.447213	1.24404	0.766153	-0.532268
-1.1746	1.27562	0.561951	0.972512	-0.999999	0.447213	-1.00932	1.41134	-0.712758
1.28497	-1.22924	0	-1.19868	0.999999	1.34164	0.117362	0.120972	0.990001
-1.1746	1.27562	0.561951	0.972512	-0.999999	1.34164	0.117362	0.120972	-0.540202
-0.701608	0.718989	-0.561951	0.972512	-0.999999	-0.447213	0.117362	1.41134	-1.01027
-0.228614	0.162352	-1.68585	0.972512	-0.999999	1.34164	-1.00932	0.120972	-1.18283
0.906572	-0.95092	-0.561951	-0.65588	0.999999	-1.34164	0.117362	0.766153	0.71034
-0.233581	0.0194112	-0.17208	-0.594165	0.999999	0.247677	0.166108	-0.0164017	-2.17401
-1.1746	1.27562	0.561951	0.972512	-0.999999	1.34164	-1.00932	0.766153	-0.708792
-0.701608	0.718989	-0.561951	0.972512	-0.999999	-0.447213	1.24404	-1.16939	-0.75441
-0.228614	0.162352	-1.68585	0.972512	-0.999999	1.34164	-1.00932	0.766153	-1.20663
1.28497	-1.22924	0	-1.19868	0.999999	-1.34164	0.117362	0.120972	0.924548
2.04176	-1.78587	-0.561951	-1.47008	0.999999	-1.34164	-1.00932	-0.52421	0.196636
0.528177	-0.672602	0	-0.65588	0.999999	1.34164	0.117362	-0.52421	0.261097
-0.701608	0.718989	-0.561951	0.972512	-0.999999	-0.447213	0.117362	-1.16939	-0.929942
0.24438	-0.394284	0.561951	-0.65588	0.999999	-1.34164	0.117362	-0.52421	1.61279
0.906572	-0.95092	-0.561951	-0.65588	0.999999	-0.447213	-1.00932	-1.16939	0.456463
-0.985404	0.997307	0	0.972512	-0.999999	-1.34164	0.117362	1.41134	-0.929942
-1.1746	1.27562	0.561951	0.972512	-0.999999	-0.447213	0.117362	-1.16939	-0.491608
0.906572	-0.95092	-0.561951	-0.65588	0.999999	0.447213	1.24404	0.120972	0.9662
-0.51241	0.44067	-1.1239	0.972512	-0.999999	-1.34164	-1.00932	0.766153	-1.15506
0.0344631	-0.262519	-0.181667	-0.347283	0.999999	0.545521	-0.278566	0.104144	-2.21395
0.528177	-0.672602	0	-0.65588	0.999999	1.34164	1.24404	0.766153	0.715298
-0.0394162	-0.115966	2.24781	-1.19868	0.999999	0.447213	0.117362	-0.52421	1.44321
0.528177	-0.672602	0	-0.65588	0.999999	-1.34164	-1.00932	0.120972	0.0617639
-1.3638	1.55394	1.1239	0.972512	-0.999999	0.447213	0.117362	0.766153	-0.763335
-0.701608	0.718989	-0.561951	0.972512	-0.999999	1.34164	1.24404	-0.52421	-0.762344
-1.3638	1.55394	1.1239	0.972512	-0.999999	0.447213	-1.00932	-0.52421	-0.925975
0.24438	-0.394284	0.561951	-0.65588	0.999999	-1.34164	-1.00932	0.120972	1.33611
-0.0394162	-0.115966	2.24781	-1.19868	0.999999	-1.34164	0.117362	0.766153	1.45214
0.24438	-0.394284	0.561951	-0.65588	0.999999	0.447213	1.24404	-1.16939	2.00253
-0.985404	0.997307	0	0.972512	-0.999999	0.447213	-1.76043	-1.81457	-1.50811
2.04176	-1.78587	-0.561951	-1.47008	0.999999	0.447213	-1.00932	1.41134	0.170852
-0.108704	-0.338007	-0.213979	-0.958249	0.999999	0.674213	0.476187	-0.129481	-2.20342
-0.228614	0.162352	-1.68585	0.972512	-0.999999	-1.34164	-1.00932	-0.52421	-1.17886
1.28497	-1.22924	0	-1.19868	0.999999	-1.34164	1.24404	-0.52421	1.34206
-0.51241	0.44067	-1.1239	0.972512	-0.999999	1.34164	-1.00932	-1.16939	-1.14613
0.906572	-0.95092	-0.561951	-0.65588	0.999999	-1.34164	1.24404	1.41134	0.991984
-0.228614	0.162352	-1.68585	0.972512	-0.999999	-1.34164	-1.76043	-1.81457	-1.61025
-0.0394162	-0.115966	2.24781	-1.19868	0.999999	-0.447213	-1.00932	-0.52421	1.00091
1.28497	-1.22924	0	-1.19868	0.999999	1.34164	1.24404	-0.52421	1.32718
-1.3638	1.55394	1.1239	0.972512	-0.999999	0.447213	1.24404	-1.16939	-0.512434
1.28497	-1.22924	0	-1.19868	0.999999	-1.34164	-1.00932	0.120972	0.571501
-0.0394162	-0.115966	2.24781	-1.19868	0.999999	1.34164	1.24404	-1.16939	1.79725
-0.985404	0.997307	0	0.972512	-0.999999	0.447213	-1.00932	0.120972	-1.06878
0.906572	-0.95092	-0.561951	-0.65588	0.999999	1.34164	0.117362	1.41134	0.702406
0.24438	-0.394284	0.561951	-0.65588	0.999999	-1.34164	0.117362	-1.16939	1.62271
2.04176	-1.78587	-0.561951	-1.47008	0.999999	1.34164	-1.00932	1.41134	0.193661
0.170439	-0.287679	0.223011	-0.726112	0.999999	0.406081	0.424355	0.0134899	-2.17598
0.24438	-0.394284	0.561951	-0.65588	0.999999	0.447213	0.117362	-1.16939	1.74072
-0.0394162	-0.115966	2.24781	-1.19868	0.999999	-0.447213	1.24404	1.41134	1.72684
2.04176	-1.78587	-0.561951	-1.47008	0.999999	0.447213	1.24404	0.766153	0.982067
-0.51241	0.44067	-1.1239	0.972512	-0.999999	0.447213	0.117362	1.41134	-0.997378
-0.985404	0.997307	0	0.972512	-0.999999	0.447213	1.24404	0.120972	-0.752427
-1.3638	1.55394	1.1239	0.972512	-0.999999	0.447213	-1.00932	1.41134	-0.942834
-0.228614	0.162352	-1.68585	0.972512	-0.999999	0.447213	0.117362	0.120972	-1.02415
0.24438	-0.394284	0.561951	-0.65588	0.999999	0.447213	1.24404	1.41134	1.8627
0.528177	-0.672602	0	-0.65588	0.999999	0.447213	0.117362	-1.16939	0.462413
-0.51241	0.44067	-1.1239	0.972512	-0.999999	-0.447213	1.24404	-1.16939	-0.764327
-0.228614	0.162352	-1.68585	0.972512	-0.999999	-1.34164	1.24404	1.41134	-0.78317
-0.0394162	-0.115966	2.24781	-1.19868	0.999999	0.447213	1.24404	0.120972	1.64453
0.528177	-0.672602	0	-0.65588	0.999999	1.34164	-1.76043	-1.81457	-0.627472
0.528177	-0.672602	0	-0.65588	0.999999	-0.447213	1.24404	-0.52421	0.712323
-0.51241	0.44067	-1.1239	0.972512	-0.999999	0.447213	0.117362	0.120972	-1.01225
1.28497	-1.22924	0	-1.19868	0.999999	-0.447213	0.117362	-0.52421	1.08719
-1.3638	1.55394	1.1239	0.972512	-0.999999	0.447213	0.117362	0.120972	-0.828788
-0.0394162	-0.115966	2.24781	-1.19868	0.999999	-1.34164	0.117362	-0.52421	1.45214
0.906572	-0.95092	-0.561951	-0.65588	0.999999	0.447213	1.24404	0.766153	0.976117
0.906572	-0.95092	-0.561951	-0.65588	0.999999	1.34164	0.117362	0.766153	0.751
0.24438	-0.394284	0.561951	-0.65588	0.999999	0.447213	-1.76043	-1.81457	0.726207
-1.3638	1.55394	1.1239	0.972512	-0.999999	1.34164	1.24404	0.120972	-0.552102
-0.701608	0.718989	-0.561951	0.972512	-0.999999	-0.447213	1.24404	0.766153	-0.762344
0.528177	-0.672602	0	-0.65588	0.999999	0.447213	-1.76043	-1.81457	-0.531276
-1.3638	1.55394	1.1239	0.972512	-0.999999	-1.34164	1.24404	1.41134	-0.571936
-0.985404	0.997307	0	0.972512	-0.999999	-0.447213	1.24404	-1.16939	-0.70185
0.528177	-0.672602	0	-0.65588	0.999999	-1.34164	1.24404	0.766153	0.656788
0.24438	-0.394284	0.561951	-0.65588	0.999999	-0.447213	-1.76043	-1.81457	0.752983
-1.3638	1.55394	1.1239	0.972512	-0.999999	1.34164	-1.00932	-1.16939	-0.921017
-0.51241	0.44067	-1.1239	0.972512	-0.999999	0.447213	-1.00932	0.766153	-1.16795
-0.0350175	-0.220664	-0.0541848	-0.972449	0.999999	0.753827	-0.309168	0.200747	-2.2041
-1.3638	1.55394	1.1239	0.972512	-0.999999	-0.447213	-1.00932	1.41134	-0.948784
0.24438	-0.394284	0.561951	-0.65588	0.999999	1.34164	-1.00932	-1.16939	1.35197
0.528177	-0.672602	0	-0.65588	0.999999	-1.34164	1.24404	-0.52421	0.658771
-1.3638	1.55394	1.1239	0.972512	-0.999999	1.34164	1.24404	0.766153	-0.549127
2.04176	-1.78587	-0.561951	-1.47008	0.999999	0.447213	0.117362	-0.52421	0.58241
0.24438	-0.394284	0.561951	-0.65588	0.999999	-1.34164	-1.76043	-1.81457	0.616128
0.0610273	-0.432275	-0.0685839	-0.332086	0.999999	0.534945	0.28361	0.292184	-2.19598
-0.985404	0.997307	0	0.972512	-0.999999	-0.447213	0.117362	-0.52421	-0.929942
-1.3638	1.55394	1.1239	0.972512	-0.999999	-0.447213	1.24404	0.120972	-0.590779
0.528177	-0.672602	0	-0.65588	0.999999	1.34164	0.117362	0.120972	0.283906
-1.3638	1.55394	1.1239	0.972512	-0.999999	0.447213	0.117362	1.41134	-0.807962
-1.1746	1.27562	0.561951	0.972512	-0.999999	-1.34164	-1.00932	0.766153	-0.684991
-0.228614	0.162352	-1.68585	0.972512	-0.999999	1.34164	-1.76043	-1.81457	-1.61323
0.906572	-0.95092	-0.561951	-0.65588	0.999999	1.34164	-1.76043	-1.81457	-0.396404
-0.122427	0.101175	-0.0993124	-0.673942	0.999999	0.134487	0.342404	0.254052	-2.19409
-0.228614	0.162352	-1.68585	0.972512	-0.999999	1.34164	1.24404	0.766153	-0.780194
0.24438	-0.394284	0.561951	-0.65588	0.999999	-1.34164	-1.00932	1.41134	1.46007
-1.1746	1.27562	0.561951	0.972512	-0.999999	-0.447213	0.117362	-0.52421	-0.542185
2.04176	-1.78587	-0.561951	-1.47008	0.999999	0.447213	-1.00932	0.120972	0.178785
-1.1746	1.27562	0.561951	0.972512	-0.999999	0.447213	-1.76043	-1.81457	-1.14415
-0.985404	0.997307	0	0.972512	-0.999999	0.447213	0.117362	0.766153	-0.936884
-0.701608	0.718989	-0.561951	0.972512	-0.999999	-1.34164	1.24404	-1.16939	-0.773253
-1.1746	1.27562	0.561951	0.972512	-0.999999	-0.447213	1.24404	-0.52421	-0.339877
1.28497	-1.22924	0	-1.19868	0.999999	1.34164	0.117362	-1.16939	0.961241
-0.228614	0.162352	-1.68585	0.972512	-0.999999	0.447213	-1.00932	0.120972	-1.1858
-1.1746	1.27562	0.561951	0.972512	-0.999999	-1.34164	0.117362	-1.16939	-0.476732
-0.228614	0.162352	-1.68585	0.972512	-0.999999	-1.34164	1.24404	0.766153	-0.787136
-0.51241	0.44067	-1.1239	0.972512	-0.999999	-0.447213	-1.76043	-1.81457	-1.57753
-0.0394162	-0.115966	2.24781	-1.19868	0.999999	0.447213	1.24404	-0.52421	1.81113
-0.701608	0.718989	-0.561951	0.972512	-0.999999	-1.34164	1.24404	1.41134	-0.811929
-0.021079	-0.328897	-0.0509382	-0.78481	0.999999	0.341942	-0.169377	0.135633	-2.17181
2.04176	-1.78587	-0.561951	-1.47008	0.999999	-0.447213	-1.00932	-1.16939	0.230354
0.906572	-0.95092	-0.561951	-0.65588	0.999999	0.447213	1.24404	-1.16939	0.970167
1.28497	-1.22924	0	-1.19868	0.999999	1.34164	1.24404	0.766153	1.41445
0.528177	-0.672602	0	-0.65588	0.999999	1.34164	-1.00932	-1.16939	0.0270542
-0.701608	0.718989	-0.561951	0.972512	-0.999999	-1.34164	-1.00932	-0.52421	-1.07671
-1.1746	1.27562	0.561951	0.972512	-0.999999	-1.34164	1.24404	1.41134	-0.45789
-0.985404	0.997307	0	0.972512	-0.999999	-1.34164	1.24404	1.41134	-0.728626
0.906572	-0.95092	-0.561951	-0.65588	0.999999	1.34164	1.24404	-0.52421	0.92554
-0.228614	0.162352	-1.68585	0.972512	-0.999999	0.447213	0.117362	-1.16939	-0.981511
-0.51241	0.44067	-1.1239	0.972512	-0.999999	1.34164	0.117362	1.41134	-0.995395
-1.3638	1.55394	1.1239	0.972512	-0.999999	-0.447213	0.117362	0.120972	-0.790112
-0.0394162	-0.115966	2.24781	-1.19868	0.999999	0.447213	1.24404	0.766153	1.81411
0.109962	-0.352539	0.00101959	-0.427318	0.999999	0.290474	-0.203025	0.286878	-2.1573
0.0761087	0.103182	0.158491	-0.951706	0.999999	0.417904	0.536778	0.126666	-2.21723
-0.701608	0.718989	-0.561951	0.972512	-0.999999	0.447213	0.117362	0.120972	-0.991428
-0.985404	0.997307	0	0.972512	-0.999999	-1.34164	1.24404	-1.16939	-0.70185
-0.51241	0.44067	-1.1239	0.972512	-0.999999	1.34164	0.117362	-1.16939	-0.959693
0.528177	-0.672602	0	-0.65588	0.999999	-0.447213	0.117362	-0.52421	0.364234
-0.0394162	-0.115966	2.24781	-1.19868	0.999999	0.447213	0.117362	0.766153	1.43825
-0.51241	0.44067	-1.1239	0.972512	-0.999999	-1.34164	1.24404	0.120972	-0.816888
-1.1746	1.27562	0.561951	0.972512	-0.999999	-0.447213	-1.00932	1.41134	-0.687966
-0.701608	0.718989	-0.561951	0.972512	-0.999999	-0.447213	1.24404	1.41134	-0.796062
-0.0394162	-0.115966	2.24781	-1.19868	0.999999	-1.34164	-1.00932	1.41134	0.991984
-1.3638	1.55394	1.1239	0.972512	-0.999999	-1.34164	1.24404	-0.52421	-0.550119
-0.701608	0.718989	-0.561951	0.972512	-0.999999	-1.34164	0.117362	1.41134	-0.975561
-1.3638	1.55394	1.1239	0.972512	-0.999999	1.34164	1.24404	-1.16939	-0.512434
-0.51241	0.44067	-1.1239	0.972512	-0.999999	-0.447213	0.117362	0.120972	-0.994403
0.24438	-0.394284	0.561951	-0.65588	0.999999	0.447213	-1.00932	0.766153	1.30338
-0.228614	0.162352	-1.68585	0.972512	-0.999999	-0.447213	-1.00932	1.41134	-1.18382
-0.0394162	-0.115966	2.24781	-1.19868	0.999999	0.447213	-1.00932	-0.52421	1.07231
2.04176	-1.78587	-0.561951	-1.47008	0.999999	-1.34164	-1.00932	0.766153	0.205561
-0.701608	0.718989	-0.561951	0.972512	-0.999999	0.447213	-1.00932	-1.16939	-1.11242
-0.228614	0.162352	-1.68585	0.972512	-0.999999	-0.447213	0.117362	-0.52421	-0.977544
-0.51241	0.44067	-1.1239	0.972512	-0.999999	0.447213	-1.00932	-1.16939	-1.15109
-1.1746	1.27562	0.561951	0.972512	-0.999999	1.34164	-1.76043	-1.81457	-1.16498
-0.985404	0.997307	0	0.972512	-0.999999	-0.447213	-1.00932	0.766153	-1.07969
-0.0394162	-0.115966	2.24781	-1.19868	0.999999	1.34164	0.117362	1.41134	1.42734
0.290048	-0.147117	0.158999	-0.928654	0.999999	0.471995	0.277125	0.225363	-2.15823
-0.51241	0.44067	-1.1239	0.972512	-0.999999	-0.447213	1.24404	0.120972	-0.820854
-0.985404	0.997307	0	0.972512	-0.999999	1.34164	-1.00932	1.41134	-1.08762
-0.228614	0.162352	-1.68585	0.972512	-0.999999	-1.34164	1.24404	-1.16939	-0.772261
2.04176	-1.78587	-0.561951	-1.47008	0.999999	-1.34164	1.24404	0.766153	1.04554
-0.985404	0.997307	0	0.972512	-0.999999	-0.447213	1.24404	1.41134	-0.732593
-0.0667351	-0.0327908	0.116105	-0.922998	0.999999	0.123069	0.49869	0.166699	-2.17015
-0.228614	0.162352	-1.68585	0.972512	-0.999999	1.34164	0.117362	-1.16939	-0.977544
1.28497	-1.22924	0	-1.19868	0.999999	0.447213	-1.00932	-1.16939	0.677613
-0.985404	0.997307	0	0.972512	-0.999999	0.447213	0.117362	-1.16939	-0.906141
-0.701608	0.718989	-0.561951	0.972512	-0.999999	0.447213	-1.00932	1.41134	-1.11043
1.28497	-1.22924	0	-1.19868	0.999999	0.447213	1.24404	-1.16939	1.42338
0.0923055	-0.309846	0.00112039	-0.412429	0.999999	0.190484	0.525815	0.0642902	-2.21133
0.122866	-0.35844	-0.208477	-0.644915	0.999999	0.425004	0.459545	0.330314	-2.17516
2.04176	-1.78587	-0.561951	-1.47008	0.999999	0.447213	1.24404	1.41134	0.982067
-0.228614	0.162352	-1.68585	0.972512	-0.999999	1.34164	0.117362	1.41134	-1.02019
0.24438	-0.394284	0.561951	-0.65588	0.999999	-1.34164	1.24404	1.41134	1.96386
-0.128521	-0.28266	0.0206782	-0.847628	0.999999	0.742879	0.551993	0.193935	-2.16968
0.24438	-0.394284	0.561951	-0.65588	0.999999	1.34164	1.24404	0.120972	1.96088
-1.3638	1.55394	1.1239	0.972512	-0.999999	0.447213	0.117362	-0.52421	-0.764327
0.24438	-0.394284	0.561951	-0.65588	0.999999	0.447213	1.24404	-0.52421	2.02633
-0.234393	-0.147537	0.000736598	-0.477563	0.999999	0.550582	0.352031	-0.112607	-2.18389
2.04176	-1.78587	-0.561951	-1.47008	0.999999	0.447213	-1.76043	-1.81457	-0.670115
-0.0394162	-0.115966	2.24781	-1.19868	0.999999	-1.34164	-1.00932	-0.52421	1.07628
-0.0394162	-0.115966	2.24781	-1.19868	0.999999	-0.447213	-1.76043	-1.81457	0.160935
-0.228614	0.162352	-1.68585	0.972512	-0.999999	1.34164	0.117362	-0.52421	-0.99242
-0.0394162	-0.115966	2.24781	-1.19868	0.999999	1.34164	0.117362	0.120972	1.40949
-1.1746	1.27562	0.561951	0.972512	-0.999999	1.34164	0.117362	-1.16939	-0.489625
-0.244884	-0.2507	0.146284	-0.599277	0.999999	0.187012	0.534461	-0.113876	-2.2001
0.0904559	0.192771	-0.060494	-0.442388	0.999999	0.320473	-0.036145	-0.126346	-2.17528
-0.51241	0.44067	-1.1239	0.972512	-0.999999	-1.34164	1.24404	1.41134	-0.979527
0.24438	-0.394284	0.561951	-0.65588	0.999999	-0.447213	1.24404	1.41134	1.94898
0.24438	-0.394284	0.561951	-0.65588	0.999999	-0.447213	0.117362	0.766153	1.63957
-0.51241	0.44067	-1.1239	0.972512	-0.999999	1.34164	-1.76043	-1.81457	-1.57753
-0.701608	0.718989	-0.561951	0.972512	-0.999999	0.447213	0.117362	-1.16939	-0.949776
-0.985404	0.997307	0	0.972512	-0.999999	1.34164	-1.76043	-1.81457	-1.50811
-0.0394162	-0.115966	2.24781	-1.19868	0.999999	-0.447213	-1.00932	1.41134	1.08124
-0.51241	0.44067	-1.1239	0.972512	-0.999999	1.34164	0.117362	-0.52421	-0.973577
-1.3638	1.55394	1.1239	0.972512	-0.999999	-0.447213	1.24404	1.41134	-0.581853
-0.51241	0.44067	-1.1239	0.972512	-0.999999	1.34164	1.24404	0.766153	-0.758377
0.528177	-0.672602	0	-0.65588	0.999999	-1.34164	0.117362	0.766153	0.3325
-0.985404	0.997307	0	0.972512	-0.999999	-0.447213	-1.00932	-0.52421	-1.07969
0.906572	-0.95092	-0.561951	-0.65588	0.999999	-1.34164	1.24404	-0.52421	1.00884
0.528177	-0.672602	0	-0.65588	0.999999	0.447213	1.24404	-0.52421	0.628028
0.528177	-0.672602	0	-0.65588	0.999999	-0.447213	-1.00932	-0.52421	0.190686
-0.985404	0.997307	0	0.972512	-0.999999	1.34164	-1.00932	-0.52421	-1.0787
1.28497	-1.22924	0	-1.19868	0.999999	0.447213	0.117362	0.766153	0.968183
-1.1746	1.27562	0.561951	0.972512	-0.999999	0.447213	0.117362	0.766153	-0.569953
-0.0394162	-0.115966	2.24781	-1.19868	0.999999	-1.34164	1.24404	1.41134	1.63758
-0.701608	0.718989	-0.561951	0.972512	-0.999999	1.34164	1.24404	0.766153	-0.753418
0.117812	-0.0599956	-0.168344	-0.881373	0.999999	0.195191	-0.166041	-0.0355282	-2.20372
0.312033	0.114433	-0.125186	-0.539672	0.999999	0.496806	0.428329	0.355392	-2.20905
-0.0394162	-0.115966	2.24781	-1.19868	0.999999	0.447213	-1.00932	-1.16939	1.05446
-1.1746	1.27562	0.561951	0.972512	-0.999999	1.34164	0.117362	0.766153	-0.564003
-0.51241	0.44067	-1.1239	0.972512	-0.999999	1.34164	1.24404	-0.52421	-0.753418
-1.3638	1.55394	1.1239	0.972512	-0.999999	1.34164	0.117362	-0.52421	-0.764327
-1.3638	1.55394	1.1239	0.972512	-0.999999	-1.34164	0.117362	0.120972	-0.832755
-0.701608	0.718989	-0.561951	0.972512	-0.999999	0.447213	1.24404	0.120972	-0.791103
1.28497	-1.22924	0	-1.19868	0.999999	-0.447213	1.24404	0.120972	1.25379
0.528177	-0.672602	0	-0.65588	0.999999	1.34164	0.117362	-1.16939	0.38506
0.906572	-0.95092	-0.561951	-0.65588	0.999999	-0.447213	1.24404	1.41134	0.942399
-0.701608	0.718989	-0.561951	0.972512	-0.999999	-0.447213	-1.00932	1.41134	-1.10746
-1.3638	1.55394	1.1239	0.972512	-0.999999	1.34164	-1.76043	-1.81457	-1.36927
0.906572	-0.95092	-0.561951	-0.65588	0.999999	0.447213	-1.00932	-1.16939	0.402911
-1.1746	1.27562	0.561951	0.972512	-0.999999	1.34164	-1.00932	-0.52421	-0.705817
0.24438	-0.394284	0.561951	-0.65588	0.999999	-0.447213	-1.00932	0.766153	1.34701
0.528177	-0.672602	0	-0.65588	0.999999	0.447213	-1.00932	0.120972	0.184735
-1.1746	1.27562	0.561951	0.972512	-0.999999	-0.447213	-1.00932	-1.16939	-0.704825
0.247677	0.0543777	-0.0717051	-0.352716	0.999999	0.58015	0.391082	0.207977	-2.20524
-1.1746	1.27562	0.561951	0.972512	-0.999999	-1.34164	0.117362	1.41134	-0.553094
-0.228614	0.162352	-1.68585	0.972512	-0.999999	-0.447213	-1.00932	-0.52421	-1.17489
-1.1746	1.27562	0.561951	0.972512	-0.999999	-1.34164	1.24404	-1.16939	-0.276408
1.28497	-1.22924	0	-1.19868	0.999999	-1.34164	1.24404	1.41134	1.3252
-0.0503051	-0.0955621	-0.078255	-0.904153	0.999999	0.135125	0.113139	-0.0829788	-2.22621
2.04176	-1.78587	-0.561951	-1.47008	0.999999	1.34164	0.117362	-0.52421	0.624061
-0.0394162	-0.115966	2.24781	-1.19868	0.999999	0.447213	1.24404	1.41134	1.68618
-0.0394162	-0.115966	2.24781	-1.19868	0.999999	1.34164	-1.00932	0.120972	1.08421
-0.51241	0.44067	-1.1239	0.972512	-0.999999	0.447213	-1.00932	0.120972	-1.15308
-0.274482	0.155341	-0.0378834	-0.603942	0.999999	0.141263	0.310825	0.277652	-2.15931
-0.228614	0.162352	-1.68585	0.972512	-0.999999	0.447213	0.117362	0.766153	-1.00432
-0.0394162	-0.115966	2.24781	-1.19868	0.999999	0.447213	0.117362	1.41134	1.36387
-0.228614	0.162352	-1.68585	0.972512	-0.999999	-0.447213	0.117362	0.766153	-0.99242
-0.51241	0.44067	-1.1239	0.972512	-0.999999	1.34164	-1.00932	1.41134	-0.854572
-0.985404	0.997307	0	0.972512	-0.999999	-1.34164	1.24404	0.766153	-0.690941
2.04176	-1.78587	-0.561951	-1.47008	0.999999	-1.34164	-1.00932	1.41134	0.202586
1.28497	-1.22924	0	-1.19868	0.999999	0.447213	1.24404	-0.52421	1.36387
-1.1746	1.27562	0.561951	0.972512	-0.999999	-0.447213	-1.00932	0.120972	-0.688958
2.04176	-1.78587	-0.561951	-1.47008	0.999999	-1.34164	1.24404	-1.16939	0.987026
-1.3638	1.55394	1.1239	0.972512	-0.999999	-0.447213	-1.00932	0.120972	-0.959693
-1.3638	1.55394	1.1239	0.972512	-0.999999	0.447213	-1.00932	0.120972	-0.95176
0.906572	-0.95092	-0.561951	-0.65588	0.999999	-0.447213	-1.00932	0.120972	0.412828
1.28497	-1.22924	0	-1.19868	0.999999	0.447213	1.24404	0.120972	1.26371
0.24438	-0.394284	0.561951	-0.65588	0.999999	-1.34164	0.117362	0.120972	1.6594
0.24438	-0.394284	0.561951	-0.65588	0.999999	-0.447213	-1.00932	0.120972	1.30635
-0.985404	0.997307	0	0.972512	-0.999999	-1.34164	-1.00932	0.120972	-1.06283
2.04176	-1.78587	-0.561951	-1.47008	0.999999	-1.34164	-1.00932	-1.16939	0.225395
2.04176	-1.78587	-0.561951	-1.47008	0.999999	1.34164	1.24404	1.41134	1.03364
-0.228614	0.162352	-1.68585	0.972512	-0.999999	-0.447213	1.24404	-1.16939	-0.763335
-0.0394162	-0.115966	2.24781	-1.19868	0.999999	1.34164	-1.76043	-1.81457	0.160935
0.24438	-0.394284	0.561951	-0.65588	0.999999	1.34164	1.24404	0.766153	2.04815
0.906572	-0.95092	-0.561951	-0.65588	0.999999	1.34164	1.24404	0.766153	1.03562
0.906572	-0.95092	-0.561951	-0.65588	0.999999	1.34164	-1.00932	0.766153	0.468363
-0.228614	0.162352	-1.68585	0.972512	-0.999999	1.34164	1.24404	-1.16939	-0.769286
-1.1746	1.27562	0.561951	0.972512	-0.999999	-0.447213	0.117362	1.41134	-0.540202
0.528177	-0.672602	0	-0.65588	0.999999	-0.447213	1.24404	-1.16939	0.753975
-0.228614	0.162352	-1.68585	0.972512	-0.999999	-0.447213	0.117362	0.120972	-1.0192
2.04176	-1.78587	-0.561951	-1.47008	0.999999	1.34164	1.24404	-1.16939	1.0138
-0.0394162	-0.115966	2.24781	-1.19868	0.999999	0.447213	-1.76043	-1.81457	0.244238
1.28497	-1.22924	0	-1.19868	0.999999	-1.34164	1.24404	0.120972	1.18338
0.528177	-0.672602	0	-0.65588	0.999999	0.447213	1.24404	-1.16939	0.71629
0.528177	-0.672602	0	-0.65588	0.999999	0.447213	-1.00932	1.41134	0.0577971
2.04176	-1.78587	-0.561951	-1.47008	0.999999	1.34164	-1.00932	0.766153	0.199611
-0.12331	-0.391877	0.188893	-0.638351	0.999999	0.431917	0.245714	0.333674	-2.22593
-0.197679	-0.00922611	0.175074	-0.537772	0.999999	0.0948658	-0.126246	0.138879	-2.21496
-0.0394162	-0.115966	2.24781	-1.19868	0.999999	-0.447213	0.117362	1.41134	1.42139
-0.228614	0.162352	-1.68585	0.972512	-0.999999	-0.447213	0.117362	-1.16939	-0.972585
2.04176	-1.78587	-0.561951	-1.47008	0.999999	-1.34164	0.117362	0.120972	0.631003
1.28497	-1.22924	0	-1.19868	0.999999	1.34164	0.117362	0.766153	1.08818
-1.1746	1.27562	0.561951	0.972512	-0.999999	-1.34164	0.117362	-0.52421	-0.512434
0.528177	-0.672602	0	-0.65588	0.999999	-0.447213	-1.00932	0.120972	0.152009
-0.985404	0.997307	0	0.972512	-0.999999	0.447213	0.117362	0.120972	-0.948784
-0.317516	-0.348904	0.224557	-0.794023	0.999999	0.65659	0.513411	-0.0462635	-2.1635
-1.1746	1.27562	0.561951	0.972512	-0.999999	-1.34164	0.117362	0.766153	-0.527309
-1.1746	1.27562	0.561951	0.972512	-0.999999	1.34164	1.24404	1.41134	-0.439048
2.04176	-1.78587	-0.561951	-1.47008	0.999999	-0.447213	0.117362	0.120972	0.620094
1.28497	-1.22924	0	-1.19868	0.999999	0.447213	-1.76043	-1.81457	-0.158395
1.28497	-1.22924	0	-1.19868	0.999999	-0.447213	-1.76043	-1.81457	-0.0840169
2.04176	-1.78587	-0.561951	-1.47008	0.999999	-1.34164	-1.00932	0.120972	0.195644
-0.701608	0.718989	-0.561951	0.972512	-0.999999	-1.34164	1.24404	0.120972	-0.792095
-0.0394162	-0.115966	2.24781	-1.19868	0.999999	-0.447213	1.24404	-0.52421	1.76948
0.24438	-0.394284	0.561951	-0.65588	0.999999	-1.34164	1.24404	-0.52421	1.91725
-0.701608	0.718989	-0.561951	0.972512	-0.999999	-1.34164	1.24404	0.766153	-0.770277
0.906572	-0.95092	-0.561951	-0.65588	0.999999	1.34164	1.24404	1.41134	0.967191
-0.228614	0.162352	-1.68585	0.972512	-0.999999	-0.447213	-1.00932	0.120972	-1.18679
-0.228614	0.162352	-1.68585	0.972512	-0.999999	0.447213	1.24404	-0.52421	-0.805979
0.528177	-0.672602	0	-0.65588	0.999999	-0.447213	1.24404	1.41134	0.713315
-0.0394162	-0.115966	2.24781	-1.19868	0.999999	0.447213	-1.00932	1.41134	1.00686

## Sheet: Test
xt_0	xt_1	xt_2	xt_3	xt_4	xt_5	xt_6	xt_7	yt
-0.0394162	-0.115966	2.24781	-1.19868	0.999999	1.34164	-1.00932	-0.52421	1.0019
-0.0394162	-0.115966	2.24781	-1.19868	0.999999	-1.34164	-1.00932	0.766153	1.06835
-0.0394162	-0.115966	2.24781	-1.19868	0.999999	-0.447213	0.117362	0.766153	1.40255
-0.985404	0.997307	0	0.972512	-0.999999	-1.34164	-1.00932	1.41134	-1.08366
-1.1746	1.27562	0.561951	0.972512	-0.999999	-1.34164	-1.00932	-1.16939	-0.683999
-0.0394162	-0.115966	2.24781	-1.19868	0.999999	0.447213	0.117362	-1.16939	1.44817
-0.985404	0.997307	0	0.972512	-0.999999	0.447213	-1.00932	-1.16939	-1.05192
-0.701608	0.718989	-0.561951	0.972512	-0.999999	1.34164	-1.00932	0.766153	-1.10151
-1.1746	1.27562	0.561951	0.972512	-0.999999	0.447213	-1.00932	-1.16939	-0.683007
0.24438	-0.394284	0.561951	-0.65588	0.999999	1.34164	1.24404	-0.52421	1.94501
-0.985404	0.997307	0	0.972512	-0.999999	0.447213	1.24404	-1.16939	-0.70185
-1.1746	1.27562	0.561951	0.972512	-0.999999	0.447213	1.24404	0.120972	-0.379545
-0.228614	0.162352	-1.68585	0.972512	-0.999999	0.447213	1.24404	-1.16939	-0.774244
-1.1746	1.27562	0.561951	0.972512	-0.999999	0.447213	1.24404	0.766153	-0.327977
-0.51241	0.44067	-1.1239	0.972512	-0.999999	-0.447213	1.24404	0.766153	-0.75441
2.04176	-1.78587	-0.561951	-1.47008	0.999999	-0.447213	-1.00932	1.41134	0.200603
-1.3638	1.55394	1.1239	0.972512	-0.999999	-1.34164	-1.76043	-1.81457	-1.35935
-0.701608	0.718989	-0.561951	0.972512	-0.999999	1.34164	0.117362	1.41134	-0.975561
1.28497	-1.22924	0	-1.19868	0.999999	0.447213	0.117362	1.41134	0.914631
-0.985404	0.997307	0	0.972512	-0.999999	-1.34164	-1.00932	-1.16939	-1.05391
-0.228614	0.162352	-1.68585	0.972512	-0.999999	-0.447213	0.117362	1.41134	-1.0549
2.04176	-1.78587	-0.561951	-1.47008	0.999999	-1.34164	0.117362	-0.52421	0.631003
-0.51241	0.44067	-1.1239	0.972512	-0.999999	0.447213	1.24404	-1.16939	-0.774244
-0.0394162	-0.115966	2.24781	-1.19868	0.999999	1.34164	1.24404	0.766153	1.76551
1.28497	-1.22924	0	-1.19868	0.999999	0.447213	0.117362	-1.16939	1.04454
0.906572	-0.95092	-0.561951	-0.65588	0.999999	1.34164	-1.00932	1.41134	0.410844
2.04176	-1.78587	-0.561951	-1.47008	0.999999	0.447213	0.117362	1.41134	0.579434
-0.985404	0.997307	0	0.972512	-0.999999	-1.34164	1.24404	0.120972	-0.708792
0.906572	-0.95092	-0.561951	-0.65588	0.999999	1.34164	1.24404	-1.16939	0.89083
0.528177	-0.672602	0	-0.65588	0.999999	1.34164	-1.00932	0.766153	0.191677
0.906572	-0.95092	-0.561951	-0.65588	0.999999	0.447213	-1.00932	-0.52421	0.398944
-1.3638	1.55394	1.1239	0.972512	-0.999999	1.34164	0.117362	0.766153	-0.759369
-0.51241	0.44067	-1.1239	0.972512	-0.999999	-1.34164	-1.76043	-1.81457	-1.5805
0.906572	-0.95092	-0.561951	-0.65588	0.999999	-1.34164	0.117362	1.41134	0.734141
2.04176	-1.78587	-0.561951	-1.47008	0.999999	-0.447213	1.24404	0.766153	1.02769
-1.1746	1.27562	0.561951	0.972512	-0.999999	-0.447213	1.24404	1.41134	-0.408305
-1.3638	1.55394	1.1239	0.972512	-0.999999	-0.447213	0.117362	1.41134	-0.824821
-0.985404	0.997307	0	0.972512	-0.999999	1.34164	1.24404	0.766153	-0.694908
0.906572	-0.95092	-0.561951	-0.65588	0.999999	0.447213	0.117362	0.766153	0.671663
0.906572	-0.95092	-0.561951	-0.65588	0.999999	1.34164	0.117362	-0.52421	0.604227
-0.228614	0.162352	-1.68585	0.972512	-0.999999	-1.34164	0.117362	-1.16939	-0.979527
-0.51241	0.44067	-1.1239	0.972512	-0.999999	-0.447213	0.117362	1.41134	-1.00333
0.906572	-0.95092	-0.561951	-0.65588	0.999999	0.447213	0.117362	0.120972	0.706373
-0.51241	0.44067	-1.1239	0.972512	-0.999999	-1.34164	0.117362	1.41134	-0.995395
-0.0394162	-0.115966	2.24781	-1.19868	0.999999	-0.447213	-1.00932	0.120972	1.08818
-0.985404	0.997307	0	0.972512	-0.999999	-0.447213	1.24404	0.766153	-0.695899
-0.985404	0.997307	0	0.972512	-0.999999	1.34164	1.24404	-1.16939	-0.70185
-0.51241	0.44067	-1.1239	0.972512	-0.999999	0.447213	0.117362	0.766153	-1.00531
-0.51241	0.44067	-1.1239	0.972512	-0.999999	-0.447213	0.117362	-1.16939	-0.95771
0.906572	-0.95092	-0.561951	-0.65588	0.999999	1.34164	0.117362	0.120972	0.670671
1.28497	-1.22924	0	-1.19868	0.999999	1.34164	-1.00932	1.41134	0.665713
2.04176	-1.78587	-0.561951	-1.47008	0.999999	-1.34164	0.117362	0.766153	0.633978
2.04176	-1.78587	-0.561951	-1.47008	0.999999	1.34164	-1.00932	0.120972	0.202586
0.24438	-0.394284	0.561951	-0.65588	0.999999	-0.447213	1.24404	-0.52421	2.06203
0.528177	-0.672602	0	-0.65588	0.999999	-1.34164	0.117362	-1.16939	0.449521
0.528177	-0.672602	0	-0.65588	0.999999	-0.447213	-1.00932	1.41134	0.156968
-0.228614	0.162352	-1.68585	0.972512	-0.999999	0.447213	0.117362	1.41134	-1.05787
0.906572	-0.95092	-0.561951	-0.65588	0.999999	-1.34164	-1.00932	-0.52421	0.41382
-0.51241	0.44067	-1.1239	0.972512	-0.999999	-0.447213	-1.00932	-0.52421	-1.14911
0.24438	-0.394284	0.561951	-0.65588	0.999999	-1.34164	0.117362	1.41134	1.7437
-0.228614	0.162352	-1.68585	0.972512	-0.999999	0.447213	0.117362	-0.52421	-1.0063
-0.0394162	-0.115966	2.24781	-1.19868	0.999999	-1.34164	-1.76043	-1.81457	0.244238
0.24438	-0.394284	0.561951	-0.65588	0.999999	-0.447213	-1.00932	1.41134	1.42833
-0.51241	0.44067	-1.1239	0.972512	-0.999999	0.447213	-1.76043	-1.81457	-1.5809
-0.701608	0.718989	-0.561951	0.972512	-0.999999	-1.34164	1.24404	-0.52421	-0.749452
-0.701608	0.718989	-0.561951	0.972512	-0.999999	-1.34164	-1.00932	0.766153	-1.10349
0.906572	-0.95092	-0.561951	-0.65588	0.999999	-1.34164	1.24404	-1.16939	0.950332
0.24438	-0.394284	0.561951	-0.65588	0.999999	1.34164	0.117362	0.766153	1.76651
0.24438	-0.394284	0.561951	-0.65588	0.999999	-1.34164	1.24404	-1.16939	1.89344
-0.228614	0.162352	-1.68585	0.972512	-0.999999	-1.34164	-1.00932	1.41134	-1.1739
-0.228614	0.162352	-1.68585	0.972512	-0.999999	-0.447213	-1.00932	-1.16939	-1.17787
-0.701608	0.718989	-0.561951	0.972512	-0.999999	-1.34164	0.117362	0.766153	-0.931925
-1.3638	1.55394	1.1239	0.972512	-0.999999	-0.447213	1.24404	0.766153	-0.536235
1.28497	-1.22924	0	-1.19868	0.999999	-0.447213	0.117362	-1.16939	1.10801
-0.701608	0.718989	-0.561951	0.972512	-0.999999	-1.34164	-1.00932	1.41134	-1.10052
2.04176	-1.78587	-0.561951	-1.47008	0.999999	1.34164	-1.00932	-1.16939	0.226387
-0.228614	0.162352	-1.68585	0.972512	-0.999999	-1.34164	0.117362	1.41134	-1.01027

## Sheet: results
0.946737	0.855068	0.322121
