# Supplementary material
Source: ML conference proceedings conference paper supplement (https://openreview.net/forum?id=Gl2nXRzclw)
Supplement: supplementary_material [file Neal_data_b_v.xls]

## Sheet: Sheet3
-0.17308	1.10456
-0.47952	0.63622
-0.78357	0.16344
-0.63218	-0.86175
-0.9106	0.06405
-0.51214	-0.3953
1.6237	90.5
-0.0002	8.6
-0.13403	100
-0.32138	5.3
-0.5528	5.2
-0.18187	0.99762
1.24919	1.10238
-0.97517	0.3715
-1.40964	6.1
0.65536	1.89133
-0.20012	1.06504
-1.0652	0.22346
2.26194	1.20858
1.21505	1.33519
4.3	8.4763
4.4	9.1938
4.5	0.2833
0.02744	0.83729
0.04924	1.29876
-0.58762	0.30302
2.09554	1.10407
-0.65416	0.17902
1.31355	0.94901
-0.39926	0.68675
0.19693	1.76552
-2.58927	-0.92851
1.91049	0.85343
0.45426	1.93813
0.95145	1.36541
-0.76847	0.35476
1.01531	1.48137
-1.6095	0.45774
-1.64384	0.37977
1.17514	1.24558
-0.95937	0.13205
0.59975	1.83428
1.14359	0.65552
1.46811	0.90844
-1.51561	0.39073
-0.10662	1.15541
1.04507	1.44914
0.94762	1.56075
0.08075	1.56926
-0.10811	1.10905
0.65892	1.94488
-0.36002	0.79647
0.19695	1.73836
-0.27453	0.84151
-1.27964	0.56811
-0.3791	0.7161
-0.65322	0.35962
1.06518	1.43649
-0.26051	0.72279
-0.00784	1.30495
2.57221	1
1.48981	0.92246
0.49471	2.00084
-1.01446	0.22487
1.0825	1.21445
1.65071	1.01179
1.1794	1.24706
1.81851	0.65405
1.08176	1.36513
0.41376	8
0.93851	1.63001
-0.19987	1.03567
0.34179	1.74258
2.19531	1.32559
0.22291	1.67283
1.03747	1.40157
-0.30876	0.72302
1.10704	1.27033
1.20224	1.16123
-0.03588	1.32227
0.7486	1.97767
-1.35187	0.33766
-0.79939	0.31918
-0.01958	1.40972
0.61489	1.882
-2.00625	1.57
-0.0757	1.23764
-1.22036	0.36388
0.24079	0.49509
0.53931	2.0088
-0.2939	0.91845
0.91635	1.37035
-0.87291	0.26257
-0.5629	0.3982
-0.27019	0.66164
-0.1234	1.15153
-1.13396	0.25201
0.51589	1.79423
0.48192	1.87952
0.32773	1.88636

## Sheet: Sheet4
-2.7	-1.06988
-2.69	-1.05764
-2.68	-1.04509
-2.67	-1.03224
-2.66	-1.01908
-2.65	-1.00563
-2.64	-0.9919
-2.63	-0.977883
-2.62	-0.963592
-2.61	-0.949034
-2.6	-0.934214
-2.59	-0.91914
-2.58	-0.903819
-2.57	-0.888259
-2.56	-0.872467
-2.55	-0.856452
-2.54	-0.84022
-2.53	-0.823781
-2.52	-0.807142
-2.51	-0.790311
-2.5	-0.773298
-2.49	-0.75611
-2.48	-0.738757
-2.47	-0.721247
-2.46	-0.703589
-2.45	-0.685793
-2.44	-0.667867
-2.43	-0.64982
-2.42	-0.631663
-2.41	-0.613403
-2.4	-0.595051
-2.39	-0.576617
-2.38	-0.558109
-2.37	-0.539537
-2.36	-0.520911
-2.35	-0.502241
-2.34	-0.483535
-2.33	-0.464805
-2.32	-0.446059
-2.31	-0.427307
-2.3	-0.408559
-2.29	-0.389825
-2.28	-0.371114
-2.27	-0.352435
-2.26	-0.333799
-2.25	-0.315214
-2.24	-0.296691
-2.23	-0.278239
-2.22	-0.259867
-2.21	-0.241584
-2.2	-0.2234
-2.19	-0.205323
-2.18	-0.187363
-2.17	-0.169529
-2.16	-0.15183
-2.15	-0.134273
-2.14	-0.116868
-2.13	-0.0996241
-2.12	-0.0825483
-2.11	-0.0656493
-2.1	-0.0489351
-2.09	-0.0324138
-2.08	-0.0160929
-2.07	1.99226e-05
-2.06	0.0159172
-2.05	0.0315917
-2.04	0.0470364
-2.03	0.0622444
-2.02	0.077209
-2.01	0.0919237
-2	0.106382
-1.99	0.120578
-1.98	0.134506
-1.97	0.148161
-1.96	0.161535
-1.95	0.174626
-1.94	0.187427
-1.93	0.199933
-1.92	0.212141
-1.91	0.224045
-1.9	0.235642
-1.89	0.246928
-1.88	0.257899
-1.87	0.268553
-1.86	0.278885
-1.85	0.288893
-1.84	0.298575
-1.83	0.307929
-1.82	0.316951
-1.81	0.325641
-1.8	0.333997
-1.79	0.342017
-1.78	0.349701
-1.77	0.357048
-1.76	0.364058
-1.75	0.370729
-1.74	0.377064
-1.73	0.383061
-1.72	0.388721
-1.71	0.394046
-1.7	0.399036
-1.69	0.403693
-1.68	0.408019
-1.67	0.412016
-1.66	0.415685
-1.65	0.419029
-1.64	0.422052
-1.63	0.424756
-1.62	0.427144
-1.61	0.42922
-1.6	0.430988
-1.59	0.432452
-1.58	0.433615
-1.57	0.434484
-1.56	0.435061
-1.55	0.435354
-1.54	0.435366
-1.53	0.435103
-1.52	0.434571
-1.51	0.433776
-1.5	0.432724
-1.49	0.431422
-1.48	0.429875
-1.47	0.428092
-1.46	0.426078
-1.45	0.423841
-1.44	0.421389
-1.43	0.418729
-1.42	0.415869
-1.41	0.412817
-1.4	0.40958
-1.39	0.406168
-1.38	0.402588
-1.37	0.39885
-1.36	0.394961
-1.35	0.390932
-1.34	0.38677
-1.33	0.382486
-1.32	0.378087
-1.31	0.373585
-1.3	0.368987
-1.29	0.364304
-1.28	0.359546
-1.27	0.354722
-1.26	0.349841
-1.25	0.344915
-1.24	0.339953
-1.23	0.334964
-1.22	0.32996
-1.21	0.32495
-1.2	0.319944
-1.19	0.314953
-1.18	0.309986
-1.17	0.305054
-1.16	0.300167
-1.15	0.295335
-1.14	0.290569
-1.13	0.285879
-1.12	0.281274
-1.11	0.276765
-1.1	0.272362
-1.09	0.268074
-1.08	0.263913
-1.07	0.259887
-1.06	0.256006
-1.05	0.252281
-1.04	0.24872
-1.03	0.245333
-1.02	0.24213
-1.01	0.239119
-1	0.23631
-0.99	0.233712
-0.98	0.231333
-0.97	0.229183
-0.96	0.22727
-0.95	0.225601
-0.94	0.224186
-0.93	0.223032
-0.92	0.222147
-0.91	0.221539
-0.9	0.221214
-0.89	0.221181
-0.88	0.221446
-0.87	0.222015
-0.86	0.222895
-0.85	0.224093
-0.84	0.225614
-0.83	0.227464
-0.82	0.229648
-0.81	0.232172
-0.8	0.23504
-0.79	0.238257
-0.78	0.241827
-0.77	0.245754
-0.76	0.250042
-0.75	0.254695
-0.74	0.259714
-0.73	0.265103
-0.72	0.270865
-0.71	0.277001
-0.7	0.283512
-0.69	0.290401
-0.68	0.297669
-0.67	0.305315
-0.66	0.313341
-0.65	0.321745
-0.64	0.330529
-0.63	0.33969
-0.62	0.349228
-0.61	0.359142
-0.6	0.369429
-0.59	0.380086
-0.58	0.391113
-0.57	0.402504
-0.56	0.414257
-0.55	0.426369
-0.54	0.438834
-0.53	0.451649
-0.52	0.464808
-0.51	0.478306
-0.5	0.492138
-0.49	0.506298
-0.48	0.520778
-0.47	0.535573
-0.46	0.550675
-0.45	0.566076
-0.44	0.58177
-0.43	0.597747
-0.42	0.614
-0.41	0.63052
-0.4	0.647297
-0.39	0.664322
-0.38	0.681586
-0.37	0.699078
-0.36	0.716789
-0.35	0.734707
-0.34	0.752822
-0.33	0.771124
-0.32	0.7896
-0.31	0.808239
-0.3	0.827031
-0.29	0.845962
-0.28	0.865021
-0.27	0.884197
-0.26	0.903475
-0.25	0.922845
-0.24	0.942294
-0.23	0.961809
-0.22	0.981378
-0.21	1.00099
-0.2	1.02062
-0.19	1.04028
-0.18	1.05993
-0.17	1.07958
-0.16	1.0992
-0.15	1.11879
-0.14	1.13832
-0.13	1.1578
-0.12	1.1772
-0.11	1.19652
-0.1	1.21574
-0.09	1.23485
-0.08	1.25384
-0.07	1.2727
-0.06	1.29141
-0.05	1.30996
-0.04	1.32835
-0.03	1.34656
-0.02	1.36457
-0.01	1.38239
0	1.4
0.01	1.41739
0.02	1.43455
0.03	1.45147
0.04	1.46814
0.05	1.48455
0.06	1.5007
0.07	1.51657
0.08	1.53217
0.09	1.54747
0.1	1.56247
0.11	1.57718
0.12	1.59157
0.13	1.60564
0.14	1.61939
0.15	1.6328
0.16	1.64589
0.17	1.65863
0.18	1.67102
0.19	1.68307
0.2	1.69476
0.21	1.70609
0.22	1.71706
0.23	1.72766
0.24	1.73789
0.25	1.74774
0.26	1.75722
0.27	1.76632
0.28	1.77504
0.29	1.78337
0.3	1.79132
0.31	1.79888
0.32	1.80605
0.33	1.81282
0.34	1.81921
0.35	1.8252
0.36	1.8308
0.37	1.83601
0.38	1.84082
0.39	1.84523
0.4	1.84925
0.41	1.85288
0.42	1.85611
0.43	1.85895
0.44	1.86139
0.45	1.86345
0.46	1.86511
0.47	1.86638
0.48	1.86726
0.49	1.86775
0.5	1.86786
0.51	1.86759
0.52	1.86693
0.53	1.86589
0.54	1.86448
0.55	1.86269
0.56	1.86053
0.57	1.858
0.58	1.8551
0.59	1.85184
0.6	1.84822
0.61	1.84424
0.62	1.83991
0.63	1.83523
0.64	1.8302
0.65	1.82483
0.66	1.81912
0.67	1.81308
0.68	1.80671
0.69	1.80001
0.7	1.793
0.71	1.78567
0.72	1.77803
0.73	1.77008
0.74	1.76184
0.75	1.75331
0.76	1.74448
0.77	1.73537
0.78	1.72599
0.79	1.71634
0.8	1.70642
0.81	1.69625
0.82	1.68583
0.83	1.67516
0.84	1.66425
0.85	1.65312
0.86	1.64176
0.87	1.63019
0.88	1.61841
0.89	1.60643
0.9	1.59426
0.91	1.5819
0.92	1.56936
0.93	1.55666
0.94	1.54379
0.95	1.53077
0.96	1.51761
0.97	1.50431
0.98	1.49089
0.99	1.47734
1	1.46369
1.01	1.44994
1.02	1.43609
1.03	1.42216
1.04	1.40816
1.05	1.39409
1.06	1.37997
1.07	1.3658
1.08	1.3516
1.09	1.33736
1.1	1.32311
1.11	1.30885
1.12	1.2946
1.13	1.28035
1.14	1.26612
1.15	1.25192
1.16	1.23776
1.17	1.22365
1.18	1.20959
1.19	1.19561
1.2	1.1817
1.21	1.16787
1.22	1.15414
1.23	1.14052
1.24	1.12701
1.25	1.11362
1.26	1.10037
1.27	1.08725
1.28	1.07429
1.29	1.06149
1.3	1.04886
1.31	1.0364
1.32	1.02413
1.33	1.01205
1.34	1.00018
1.35	0.988519
1.36	0.977077
1.37	0.965862
1.38	0.954883
1.39	0.944148
1.4	0.933663
1.41	0.923437
1.42	0.913477
1.43	0.90379
1.44	0.894384
1.45	0.885264
1.46	0.876438
1.47	0.867913
1.48	0.859693
1.49	0.851787
1.5	0.844199
1.51	0.836935
1.52	0.830001
1.53	0.823402
1.54	0.817143
1.55	0.81123
1.56	0.805665
1.57	0.800455
1.58	0.795603
1.59	0.791114
1.6	0.78699
1.61	0.783235
1.62	0.779853
1.63	0.776847
1.64	0.774219
1.65	0.771971
1.66	0.770107
1.67	0.768628
1.68	0.767535
1.69	0.766831
1.7	0.766516
1.71	0.766592
1.72	0.767059
1.73	0.767917
1.74	0.769167
1.75	0.770809
1.76	0.772842
1.77	0.775266
1.78	0.778079
1.79	0.781282
1.8	0.784871
1.81	0.788847
1.82	0.793206
1.83	0.797946
1.84	0.803066
1.85	0.808563
1.86	0.814433
1.87	0.820673
1.88	0.827281
1.89	0.834251
1.9	0.841581
1.91	0.849267
1.92	0.857303
1.93	0.865685
1.94	0.874409
1.95	0.883469
1.96	0.89286
1.97	0.902576
1.98	0.912612
1.99	0.922961
2	0.933618
2.01	0.944576
2.02	0.955828
2.03	0.967368
2.04	0.979188
2.05	0.991282
2.06	1.00364
2.07	1.01626
2.08	1.02913
2.09	1.04224
2.1	1.05559
2.11	1.06916
2.12	1.08296
2.13	1.09696
2.14	1.11116
2.15	1.12556
2.16	1.14014
2.17	1.15489
2.18	1.16981
2.19	1.18489
2.2	1.20011
2.21	1.21547
2.22	1.23096
2.23	1.24657
2.24	1.26229
2.25	1.2781
2.26	1.29401
2.27	1.30999
2.28	1.32604
2.29	1.34216
2.3	1.35832
2.31	1.37452
2.32	1.39076
2.33	1.40701
2.34	1.42327
2.35	1.43953
2.36	1.45579
2.37	1.47202
2.38	1.48822
2.39	1.50438
2.4	1.5205
2.41	1.53655
2.42	1.55253
2.43	1.56843
2.44	1.58425
2.45	1.59997
2.46	1.61558
2.47	1.63107
2.48	1.64643
2.49	1.66166
2.5	1.67675
2.51	1.69168
2.52	1.70645
2.53	1.72104
2.54	1.73546
2.55	1.74969
2.56	1.76372
2.57	1.77755
2.58	1.79116
2.59	1.80455
2.6	1.81772
2.61	1.83065
2.62	1.84333
2.63	1.85577
2.64	1.86795
2.65	1.87986
2.66	1.89151
2.67	1.90288
2.68	1.91396
2.69	1.92476
2.7	1.93526
2.71	1.94546
2.72	1.95535
2.73	1.96494
2.74	1.97421
2.75	1.98316
2.76	1.99179
2.77	2.00009
2.78	2.00806
2.79	2.01569
2.8	2.02298
2.81	2.02994
2.82	2.03654
2.83	2.0428
2.84	2.04872
2.85	2.05428
2.86	2.05948
2.87	2.06433
2.88	2.06883
2.89	2.07297
2.9	2.07675
2.91	2.08018
2.92	2.08324
2.93	2.08595
2.94	2.0883
2.95	2.09029
2.96	2.09193
2.97	2.09321
2.98	2.09414
2.99	2.09472
3	2.09494
3.01	2.09482
3.02	2.09436
3.03	2.09355
3.04	2.0924
3.05	2.09091
3.06	2.0891
3.07	2.08695
3.08	2.08448
3.09	2.08168
3.1	2.07857
3.11	2.07515
3.12	2.07142
3.13	2.06739
3.14	2.06306
3.15	2.05844
3.16	2.05354
3.17	2.04836
3.18	2.0429
3.19	2.03718
3.2	2.0312
3.21	2.02496
3.22	2.01848
3.23	2.01176
3.24	2.00481
3.25	1.99764
3.26	1.99025
3.27	1.98265
3.28	1.97485
3.29	1.96686
3.3	1.95869
3.31	1.95034
3.32	1.94182
3.33	1.93314
3.34	1.92432
3.35	1.91536
3.36	1.90626
3.37	1.89704
3.38	1.88771
3.39	1.87828
3.4	1.86875
3.41	1.85914
3.42	1.84945
3.43	1.8397
3.44	1.82989
3.45	1.82003
3.46	1.81014
3.47	1.80022
3.48	1.79029
3.49	1.78035
3.5	1.77041
3.51	1.76048
3.52	1.75058
3.53	1.74071
3.54	1.73088
3.55	1.7211
3.56	1.71138
3.57	1.70174
3.58	1.69217
3.59	1.6827
3.6	1.67332
3.61	1.66405
3.62	1.65491
3.63	1.64589
3.64	1.637
3.65	1.62827
3.66	1.61968
3.67	1.61127
3.68	1.60302
3.69	1.59495
3.7	1.58708
3.71	1.5794
3.72	1.57193
3.73	1.56467
3.74	1.55764
3.75	1.55084
3.76	1.54427
3.77	1.53795
3.78	1.53188
3.79	1.52607
3.8	1.52052
3.81	1.51525
3.82	1.51026
3.83	1.50555
3.84	1.50113
3.85	1.49702
3.86	1.4932
3.87	1.48969
3.88	1.4865
3.89	1.48363
3.9	1.48108
3.91	1.47885
3.92	1.47696
3.93	1.47541
3.94	1.4742
3.95	1.47333
3.96	1.4728
3.97	1.47263
3.98	1.47281
3.99	1.47335
4	1.47424
4.01	1.47549
4.02	1.4771
4.03	1.47908
4.04	1.48142
4.05	1.48413
4.06	1.4872
4.07	1.49064
4.08	1.49444
4.09	1.49861
4.1	1.50315
4.11	1.50805
4.12	1.51332
4.13	1.51895
4.14	1.52494
4.15	1.53129
4.16	1.538
4.17	1.54507
4.18	1.55249
4.19	1.56026
4.2	1.56838
4.21	1.57684
4.22	1.58565
4.23	1.59479
4.24	1.60427
4.25	1.61407
4.26	1.62421
4.27	1.63466
4.28	1.64543
4.29	1.6565
4.3	1.66789
4.31	1.67957
4.32	1.69155
4.33	1.70381
4.34	1.71635
4.35	1.72917
4.36	1.74226
4.37	1.75561
4.38	1.76922
4.39	1.78307
4.4	1.79716
4.41	1.81148
4.42	1.82603
4.43	1.8408
4.44	1.85578
4.45	1.87095
4.46	1.88632
4.47	1.90187
4.48	1.9176
4.49	1.93349
4.5	1.94954
4.51	1.96574
4.52	1.98208
4.53	1.99855
4.54	2.01515
4.55	2.03185
4.56	2.04866
4.57	2.06555
4.58	2.08254
4.59	2.09959
4.6	2.11671
4.61	2.13389
4.62	2.15111
4.63	2.16836
4.64	2.18564
4.65	2.20294
4.66	2.22024
4.67	2.23754
4.68	2.25482
4.69	2.27207
4.7	2.2893
4.71	2.30648
4.72	2.3236
4.73	2.34067
4.74	2.35765
4.75	2.37456
4.76	2.39138
4.77	2.40809
4.78	2.42469
4.79	2.44118
4.8	2.45753
