# Supplementary material
Source: ML conference proceedings conference paper supplement (https://openreview.net/forum?id=Gl2nXRzclw)
Supplement: supplementary_material [file Yacht_data_focused.xlsx]

## Sheet: Train
x_0	x_1	x_2	x_3	x_4	x_5	y
-0.0120349	0.424185	-1.69658	0.0423564	-1.80462	0.372101	-0.350516
0.0541569	-0.0058643	1.23241	0.024085	1.30528	-1.1163	-0.650466
-1.73302	0.0371406	-0.0737645	0.0971706	-0.229479	1.36437	1.59123
0.0377061	0.215165	-0.0574903	0.0971489	-0.181155	0.215404	-3.51754
-1.73302	0.0371406	1.23241	0.00581363	1.2245	1.61244	2.55318
0.0541569	0.0371406	-0.0341835	2.58208	-1.80462	-0.124034	-0.499169
-0.0120349	0.166155	-1.77574	-1.74824	-0.229479	-0.868235	-0.647823
0.0541569	-0.0918741	1.39073	1.85123	-0.148702	0.868235	0.152264
-1.73302	-1.46803	-0.0341835	-0.341343	-0.229479	-1.36437	-0.677554
0.0541569	0.0371406	-0.0341835	2.58208	-1.80462	0.868235	0.170763
0.0541569	-1.46803	-0.113345	-0.469243	-0.189091	1.36437	1.77622
0.0541569	-0.0058643	1.23241	0.024085	1.30528	1.1163	0.727718
0.0541569	-1.46803	1.27199	-0.450971	1.2245	-1.1163	-0.663019
0.0541569	-0.0058643	1.23241	0.024085	1.30528	0.620168	-0.162882
-1.73302	0.0371406	-0.0737645	0.0971706	-0.229479	-0.868235	-0.647162
-0.0120349	0.897239	-0.0341835	-0.1769	0.457122	-1.61244	-0.680196
-1.73302	1.54231	-0.0341835	0.553956	-0.229479	-1.36437	-0.6835
1.57657	0.0371406	1.23241	0.00581363	1.2245	0.620168	-0.114652
0.0541569	1.54231	1.23241	0.426056	1.2245	1.61244	2.42039
0.0541569	-0.0918741	1.39073	1.85123	-0.148702	0.124034	-0.423191
0.0652549	-0.121334	-0.0322221	-0.0494905	-0.188864	-0.0337024	-3.50198
-0.0120349	0.897239	-0.0341835	-0.1769	0.457122	-1.36437	-0.668304
0.120349	-0.779952	-0.0341835	0.35297	-0.552585	0.372101	-0.3743
-1.73302	-1.46803	-0.0341835	-0.341343	-0.229479	-0.372101	-0.571184
1.57657	1.54231	-0.0341835	0.553956	-0.229479	-0.372101	-0.550703
1.57657	-1.46803	-0.0341835	-0.341343	-0.229479	-1.36437	-0.672268
0.0541569	-1.46803	-0.113345	-0.469243	-0.189091	-0.620168	-0.617432
0.0541569	0.0371406	-0.0341835	2.58208	-1.80462	0.372101	-0.327392
0.120349	-0.779952	-0.0341835	0.35297	-0.552585	-1.61244	-0.6835
0.0541569	0.166155	-0.0341835	0.0971706	-0.148702	-0.868235	-0.641877
0.0541569	-1.46803	-1.77574	-2.05885	-0.229479	0.868235	0.228903
0.0541569	-1.46803	-0.113345	-0.469243	-0.189091	-1.1163	-0.662358
0.120349	-0.779952	-0.0341835	0.35297	-0.552585	1.61244	2.81283
-0.0120349	0.424185	-1.69658	0.0423564	-1.80462	0.620168	-0.162882
0.0719717	0.036123	-0.0571082	-0.0796667	-0.249744	0.172378	-3.51903
1.57657	-1.46803	-0.0341835	-0.341343	-0.229479	-0.868235	-0.632627
0.120349	-0.779952	-0.0341835	0.35297	-0.552585	1.1163	0.759431
-1.73302	-1.46803	-0.0341835	-0.341343	-0.229479	0.372101	-0.358444
-0.0120349	0.424185	-1.69658	0.0423564	-1.80462	-1.36437	-0.670286
0.0498117	-0.0772127	-0.0270493	0.041111	-0.133999	0.114592	-3.51642
0.0669795	-0.0977358	-0.0307379	-0.0318075	-0.214897	-0.116526	-3.503
0.0541569	-0.0918741	1.39073	1.85123	-0.148702	1.36437	1.44324
-0.0120349	0.897239	-0.0341835	-0.1769	0.457122	-0.620168	-0.603557
-0.0120349	0.424185	-1.69658	0.0423564	-1.80462	1.1163	0.727718
-0.0120349	0.424185	-1.69658	0.0423564	-1.80462	-0.124034	-0.506437
0.0506102	0.0711519	-0.0185066	0.115821	-0.153933	0.239367	-3.51536
0.0541569	0.0371406	-0.0341835	2.58208	-1.80462	-0.372101	-0.561934
-0.0120349	0.424185	-1.69658	0.0423564	-1.80462	-0.620168	-0.602897
-0.0120349	0.424185	-1.69658	0.0423564	-1.80462	-0.372101	-0.563256
1.57657	0.0371406	1.23241	0.00581363	1.2245	-1.1163	-0.660376
1.57657	-1.46803	-0.0341835	-0.341343	-0.229479	1.61244	3.32684
1.57657	0.0371406	-0.0737645	0.0971706	-0.229479	-0.124034	-0.503133
1.57657	0.0371406	-0.0737645	0.0971706	-0.229479	-0.868235	-0.641216
0.0541569	0.20916	-0.0341835	-1.63861	1.74955	-1.36437	-0.682178
1.57657	1.54231	-0.0341835	0.553956	-0.229479	-0.620168	-0.607521
0.0541569	0.20916	-0.0341835	-1.63861	1.74955	1.61244	2.72893
0.0541569	0.166155	-0.0341835	0.0971706	-0.148702	1.1163	0.635223
0.120349	-0.779952	-0.0341835	0.35297	-0.552585	-1.36437	-0.672268
0.0499175	0.115278	-0.0280389	-0.0471613	-0.222019	0.0432835	-3.51058
-1.73302	-1.46803	-0.0341835	-0.341343	-0.229479	1.1163	0.862498
-0.0120349	0.166155	-1.77574	-1.74824	-0.229479	1.61244	2.88947
0.120349	-0.779952	-0.0341835	0.35297	-0.552585	-0.868235	-0.636591
0.0541569	-1.46803	-1.77574	-2.05885	-0.229479	-0.868235	-0.651787
-0.0120349	0.166155	-1.77574	-1.74824	-0.229479	-0.620168	-0.621396
0.0541569	-0.0058643	1.23241	0.024085	1.30528	-0.868235	-0.631967
0.0541569	0.0371406	-0.0341835	2.58208	-1.80462	0.124034	-0.415263
1.57657	0.0371406	1.23241	0.00581363	1.2245	1.1163	0.829463
1.57657	1.54231	-0.0341835	0.553956	-0.229479	-0.868235	-0.64518
0.0541569	0.20916	-0.0341835	-1.63861	1.74955	-0.124034	-0.539471
0.0541569	-0.0918741	1.39073	1.85123	-0.148702	-1.1163	-0.647162
-1.73302	-1.46803	-0.0341835	-0.341343	-0.229479	-0.124034	-0.520311
-1.73302	1.54231	-0.0341835	0.553956	-0.229479	0.124034	-0.406674
0.0541569	-1.46803	-0.113345	-0.469243	-0.189091	0.620168	-0.197237
0.0541569	-0.0058643	1.23241	0.024085	1.30528	-1.61244	-0.680196
1.57657	-1.46803	-0.0341835	-0.341343	-0.229479	0.124034	-0.448957
0.0541569	-0.0918741	1.39073	1.85123	-0.148702	-1.61244	-0.674911
0.0398838	-0.0925067	-0.0151613	-0.0553892	-0.210778	0.283377	-3.5097
-0.0120349	0.166155	-1.77574	-1.74824	-0.229479	1.1163	0.669578
0.0541569	1.54231	1.23241	0.426056	1.2245	-0.868235	-0.64518
-1.73302	0.0371406	-0.0737645	0.0971706	-0.229479	-1.1163	-0.666983
0.0460261	0.209348	-0.0387827	0.0299564	-0.172822	0.242701	-3.51524
0.0541569	-1.46803	1.27199	-0.450971	1.2245	0.620168	-0.175435
1.57657	-1.46803	-0.0341835	-0.341343	-0.229479	-1.61244	-0.682839
0.0541569	-0.0058643	1.23241	0.024085	1.30528	0.124034	-0.429798
0.0541569	-0.0918741	1.39073	1.85123	-0.148702	0.372101	-0.308893
0.0366448	0.184646	-0.0454706	0.112759	-0.295133	-0.0233072	-3.50657
0.0541569	0.20916	-0.0341835	-1.63861	1.74955	-1.61244	-0.690767
1.57657	-1.46803	-0.0341835	-0.341343	-0.229479	0.372101	-0.333338
1.57657	0.0371406	1.23241	0.00581363	1.2245	-0.372101	-0.56788
0.0541569	-1.46803	-1.77574	-2.05885	-0.229479	-0.124034	-0.55797
-1.73302	1.54231	-0.0341835	0.553956	-0.229479	0.620168	-0.123902
-1.73302	0.0371406	-0.0737645	0.0971706	-0.229479	0.124034	-0.421209
0.0541569	1.54231	-1.77574	0.535684	-1.92579	-0.124034	-0.51965
0.0541569	-1.46803	-1.77574	-2.05885	-0.229479	-1.61244	-0.690107
0.0541569	-1.46803	-1.77574	-2.05885	-0.229479	0.124034	-0.513044
0.0541569	-1.46803	1.27199	-0.450971	1.2245	-0.372101	-0.589683
1.57657	-1.46803	-0.0341835	-0.341343	-0.229479	1.36437	2.06626
0.0541569	0.20916	-0.0341835	-1.63861	1.74955	1.36437	1.61964
1.57657	0.0371406	-0.0737645	0.0971706	-0.229479	-0.620168	-0.608843
-1.73302	1.54231	-0.0341835	0.553956	-0.229479	-1.61244	-0.689446
-1.73302	-1.46803	-0.0341835	-0.341343	-0.229479	1.36437	1.76037
0.0541569	-0.0058643	1.23241	0.024085	1.30528	0.868235	0.156228
0.0344773	0.117291	-0.0514777	-0.076161	-0.280933	0.398767	-3.5083
1.57657	1.54231	-0.0341835	0.553956	-0.229479	-1.36437	-0.681518
0.0379974	0.131498	-0.0480536	0.138502	-0.150024	0.408671	-3.5048
0.0541569	-0.0918741	1.39073	1.85123	-0.148702	0.620168	-0.146365
0.0541569	-1.46803	1.27199	-0.450971	1.2245	1.36437	1.81388
-1.73302	0.0371406	1.23241	0.00581363	1.2245	0.620168	-0.182042
-0.0120349	0.897239	-0.0341835	-0.1769	0.457122	0.372101	-0.310875
0.0541569	0.166155	-0.0341835	0.0971706	-0.148702	1.36437	1.47033
0.0363844	-0.0382975	-0.0235212	-0.0581182	-0.218962	0.207283	-3.50971
0.066565	-0.0386541	-0.0255812	-0.0180958	-0.221055	0.266967	-3.51852
-1.73302	1.54231	-0.0341835	0.553956	-0.229479	0.868235	0.131783
0.0541569	0.20916	-0.0341835	-1.63861	1.74955	1.1163	0.69997
1.57657	1.54231	-0.0341835	0.553956	-0.229479	-1.1163	-0.666983
0.0541569	0.166155	-0.0341835	0.0971706	-0.148702	-0.620168	-0.615449
0.0541569	0.166155	-0.0341835	0.0971706	-0.148702	-1.61244	-0.686143
-0.0120349	0.424185	-1.69658	0.0423564	-1.80462	0.124034	-0.429798
1.57657	0.0371406	-0.0737645	0.0971706	-0.229479	1.1163	0.900817
0.0541569	1.54231	1.23241	0.426056	1.2245	-1.36437	-0.682839
-1.73302	0.0371406	1.23241	0.00581363	1.2245	-1.1163	-0.663679
1.57657	0.0371406	1.23241	0.00581363	1.2245	0.868235	0.247402
-0.0120349	0.897239	-0.0341835	-0.1769	0.457122	0.124034	-0.406013
0.0541569	-1.46803	-0.113345	-0.469243	-0.189091	0.372101	-0.402049
-1.73302	-1.46803	-0.0341835	-0.341343	-0.229479	1.61244	2.99782
-1.73302	0.0371406	1.23241	0.00581363	1.2245	0.868235	0.125836
1.57657	1.54231	-0.0341835	0.553956	-0.229479	0.372101	-0.221683
0.0541569	0.0371406	-0.0341835	2.58208	-1.80462	1.36437	1.49609
1.57657	1.54231	-0.0341835	0.553956	-0.229479	1.1163	0.83607
0.0541569	1.54231	1.23241	0.426056	1.2245	-1.1163	-0.667643
-0.0120349	0.424185	-1.69658	0.0423564	-1.80462	-0.868235	-0.631967
0.0541569	-0.0058643	1.23241	0.024085	1.30528	1.36437	1.55093
0.0541569	-1.46803	-1.77574	-2.05885	-0.229479	0.372101	-0.437726
-1.73302	0.0371406	1.23241	0.00581363	1.2245	0.372101	-0.34523
0.0479354	0.0761322	-0.0409913	-0.0812964	-0.146958	-0.112565	-3.51484
0.0541569	1.54231	1.23241	0.426056	1.2245	-0.372101	-0.563916
0.0541569	0.0371406	-0.0341835	2.58208	-1.80462	-0.620168	-0.606861
0.0541569	1.54231	-1.77574	0.535684	-1.92579	-0.620168	-0.62602
0.120349	-0.779952	-0.0341835	0.35297	-0.552585	0.868235	0.149621
-1.73302	-1.46803	-0.0341835	-0.341343	-0.229479	-0.868235	-0.641877
-0.0120349	0.897239	-0.0341835	-0.1769	0.457122	1.36437	1.29458
1.57657	0.0371406	1.23241	0.00581363	1.2245	-0.124034	-0.516347
-1.73302	-1.46803	-0.0341835	-0.341343	-0.229479	-1.1163	-0.662358
0.0394999	-0.0536763	-0.017941	0.121329	-0.258498	-0.170293	-3.51501
1.57657	1.54231	-0.0341835	0.553956	-0.229479	1.36437	1.59387
-0.0120349	0.166155	-1.77574	-1.74824	-0.229479	1.36437	1.58595
-1.73302	1.54231	-0.0341835	0.553956	-0.229479	1.61244	2.67211
0.0541569	0.166155	-0.0341835	0.0971706	-0.148702	-1.1163	-0.662358
0.0541569	1.54231	1.23241	0.426056	1.2245	-0.124034	-0.492563
0.0605071	0.00703988	-0.0497939	0.128848	-0.277065	0.00282998	-3.50925
-1.73302	1.54231	-0.0341835	0.553956	-0.229479	0.372101	-0.283787
-0.0120349	0.897239	-0.0341835	-0.1769	0.457122	0.620168	-0.162221
-1.73302	0.0371406	-0.0737645	0.0971706	-0.229479	1.1163	0.695345
-1.73302	-1.46803	-0.0341835	-0.341343	-0.229479	-1.61244	-0.687464
-0.0120349	0.166155	-1.77574	-1.74824	-0.229479	-0.372101	-0.583076
-1.73302	0.0371406	-0.0737645	0.0971706	-0.229479	0.620168	-0.173453
0.048959	-0.114789	-0.0383727	-0.00910004	-0.167666	0.0754791	-3.50799
0.0541569	-0.0058643	1.23241	0.024085	1.30528	-0.620168	-0.602897
0.0541569	-1.46803	1.27199	-0.450971	1.2245	-1.36437	-0.676893
0.0541569	1.54231	1.23241	0.426056	1.2245	-0.620168	-0.611485
0.0541569	0.0371406	-0.0341835	2.58208	-1.80462	-0.868235	-0.636591
0.0553078	-0.121227	-0.0490155	-0.0111294	-0.313531	0.0695566	-3.50475
0.0541569	0.0371406	-0.0341835	2.58208	-1.80462	1.1163	0.720451
-0.0120349	0.897239	-0.0341835	-0.1769	0.457122	-0.868235	-0.629324
0.0541569	1.54231	-1.77574	0.535684	-1.92579	-0.868235	-0.651126
-0.0120349	0.897239	-0.0341835	-0.1769	0.457122	1.61244	2.2387
0.0541569	1.54231	-1.77574	0.535684	-1.92579	1.1163	0.600867
0.0541569	1.54231	1.23241	0.426056	1.2245	0.620168	-0.119937
0.0464843	0.234259	-0.0344755	-0.0191976	-0.22805	-0.0547549	-3.50245
0.0541569	-1.46803	1.27199	-0.450971	1.2245	-0.124034	-0.550042
1.57657	0.0371406	-0.0737645	0.0971706	-0.229479	0.124034	-0.419887
0.0541569	-1.46803	-0.113345	-0.469243	-0.189091	-1.36437	-0.678214
0.0541569	1.54231	-1.77574	0.535684	-1.92579	1.36437	1.32035
-0.0120349	0.166155	-1.77574	-1.74824	-0.229479	0.372101	-0.388175
-1.73302	1.54231	-0.0341835	0.553956	-0.229479	1.1163	0.655043
-0.0120349	0.897239	-0.0341835	-0.1769	0.457122	1.1163	0.573779
0.0541569	1.54231	-1.77574	0.535684	-1.92579	0.868235	0.117248
-1.73302	1.54231	-0.0341835	0.553956	-0.229479	1.36437	1.45117
1.57657	0.0371406	-0.0737645	0.0971706	-0.229479	0.620168	-0.0941709
0.0541569	-1.46803	1.27199	-0.450971	1.2245	-1.61244	-0.688125
-0.0120349	0.166155	-1.77574	-1.74824	-0.229479	0.124034	-0.466796
0.0541569	1.54231	1.23241	0.426056	1.2245	0.372101	-0.276519
0.0541569	-1.46803	1.27199	-0.450971	1.2245	-0.620168	-0.620074
-1.73302	1.54231	-0.0341835	0.553956	-0.229479	-0.868235	-0.651787
0.0541569	-0.0058643	1.23241	0.024085	1.30528	1.61244	2.63379
0.0535219	0.0767919	-0.0444594	0.0630943	-0.184672	-0.0351948	-3.50973
0.0541569	-0.0918741	1.39073	1.85123	-0.148702	1.61244	2.43096
1.57657	-1.46803	-0.0341835	-0.341343	-0.229479	1.1163	1.1129
0.0541569	1.54231	-1.77574	0.535684	-1.92579	-1.36437	-0.682178
0.0541569	0.166155	-0.0341835	0.0971706	-0.148702	1.61244	2.57631
-0.0120349	0.166155	-1.77574	-1.74824	-0.229479	-1.1163	-0.665001
0.0541569	-1.46803	-0.113345	-0.469243	-0.189091	0.868235	0.21635
0.0541569	-0.0918741	1.39073	1.85123	-0.148702	1.1163	0.655043
0.0541569	1.54231	1.23241	0.426056	1.2245	1.1163	0.637205
-1.73302	0.0371406	1.23241	0.00581363	1.2245	-0.620168	-0.614789
0.0739263	-0.195894	-0.0108187	-0.0603608	-0.243583	0.128427	-3.51003
-0.0120349	0.897239	-0.0341835	-0.1769	0.457122	-0.124034	-0.501151
0.120349	-0.779952	-0.0341835	0.35297	-0.552585	-0.372101	-0.57713
0.0541569	-0.0918741	1.39073	1.85123	-0.148702	-0.868235	-0.622717
0.0541569	1.54231	-1.77574	0.535684	-1.92579	-1.61244	-0.690767
0.0541569	-1.46803	-0.113345	-0.469243	-0.189091	1.1163	0.889586
-1.73302	-1.46803	-0.0341835	-0.341343	-0.229479	0.620168	-0.168167
-0.0120349	0.166155	-1.77574	-1.74824	-0.229479	-0.124034	-0.530882
0.0541569	0.20916	-0.0341835	-1.63861	1.74955	-0.868235	-0.649805
0.0645315	-0.0661561	-0.0478826	-0.0906396	-0.164911	-0.159331	-3.51545
1.57657	0.0371406	-0.0737645	0.0971706	-0.229479	-1.61244	-0.686143
0.0541569	-0.0058643	1.23241	0.024085	1.30528	-0.372101	-0.563256
-0.0120349	0.424185	-1.69658	0.0423564	-1.80462	-1.1163	-0.650466
1.57657	0.0371406	-0.0737645	0.0971706	-0.229479	1.61244	2.96941
0.0541569	-1.46803	-0.113345	-0.469243	-0.189091	1.61244	3.0368
1.57657	-1.46803	-0.0341835	-0.341343	-0.229479	-0.124034	-0.520311
1.57657	0.0371406	1.23241	0.00581363	1.2245	-0.620168	-0.608843
0.0541569	-0.0918741	1.39073	1.85123	-0.148702	-0.372101	-0.546078
-1.73302	1.54231	-0.0341835	0.553956	-0.229479	-0.620168	-0.618753
1.57657	-1.46803	-0.0341835	-0.341343	-0.229479	0.620168	-0.0690649
0.120349	-0.779952	-0.0341835	0.35297	-0.552585	-1.1163	-0.657072
0.0541569	1.54231	-1.77574	0.535684	-1.92579	1.61244	2.38934
0.0541569	0.166155	-0.0341835	0.0971706	-0.148702	0.372101	-0.363729
0.0541569	-1.46803	1.27199	-0.450971	1.2245	1.1163	0.901478
0.0541569	1.54231	-1.77574	0.535684	-1.92579	0.124034	-0.419227
0.0541569	0.166155	-0.0341835	0.0971706	-0.148702	0.868235	0.0947844
0.120349	-0.779952	-0.0341835	0.35297	-0.552585	0.620168	-0.206487
-0.0120349	0.424185	-1.69658	0.0423564	-1.80462	-1.61244	-0.680196
-1.73302	-1.46803	-0.0341835	-0.341343	-0.229479	-0.620168	-0.613467
1.57657	0.0371406	1.23241	0.00581363	1.2245	-1.36437	-0.676232
0.0723812	-0.0500595	-0.0258958	0.0160188	-0.225643	0.123838	-3.51462
0.0541569	1.54231	1.23241	0.426056	1.2245	0.868235	0.125176
1.57657	0.0371406	1.23241	0.00581363	1.2245	1.61244	2.74148
-1.73302	0.0371406	1.23241	0.00581363	1.2245	-0.124034	-0.522293
1.57657	0.0371406	-0.0737645	0.0971706	-0.229479	-1.1163	-0.661037
0.0541569	-1.46803	-0.113345	-0.469243	-0.189091	-1.61244	-0.686803
-1.73302	1.54231	-0.0341835	0.553956	-0.229479	-1.1163	-0.670947
-0.0120349	0.166155	-1.77574	-1.74824	-0.229479	-1.61244	-0.685482
0.0541569	-1.46803	1.27199	-0.450971	1.2245	-0.868235	-0.643859
0.0541569	0.20916	-0.0341835	-1.63861	1.74955	-1.1163	-0.668965
0.0541569	-1.46803	1.27199	-0.450971	1.2245	0.124034	-0.496527
0.0541569	-1.46803	1.27199	-0.450971	1.2245	0.372101	-0.401388
-1.73302	0.0371406	-0.0737645	0.0971706	-0.229479	1.61244	2.72694
0.120349	-0.779952	-0.0341835	0.35297	-0.552585	-0.124034	-0.5289
1.57657	0.0371406	1.23241	0.00581363	1.2245	0.124034	-0.444993
-1.73302	0.0371406	1.23241	0.00581363	1.2245	1.36437	1.50204
0.0541569	-0.0058643	1.23241	0.024085	1.30528	-0.124034	-0.506437
0.0541569	-1.46803	-1.77574	-2.05885	-0.229479	-1.36437	-0.682178
0.0541569	0.0371406	-0.0341835	2.58208	-1.80462	1.61244	2.61925
0.0541569	0.20916	-0.0341835	-1.63861	1.74955	0.620168	-0.223665
-1.73302	0.0371406	1.23241	0.00581363	1.2245	1.1163	0.688077
-1.73302	0.0371406	1.23241	0.00581363	1.2245	-0.868235	-0.642537
0.0541569	-1.46803	-0.113345	-0.469243	-0.189091	0.124034	-0.489259
0.0541569	-0.0058643	1.23241	0.024085	1.30528	-1.36437	-0.670286
0.0541569	1.54231	1.23241	0.426056	1.2245	1.36437	1.40558
0.0541569	0.166155	-0.0341835	0.0971706	-0.148702	0.620168	-0.220361
1.57657	-1.46803	-0.0341835	-0.341343	-0.229479	-0.372101	-0.565238
0.0541569	0.0371406	-0.0341835	2.58208	-1.80462	-1.36437	-0.67425
0.0541569	0.20916	-0.0341835	-1.63861	1.74955	-0.372101	-0.588361
0.0541569	0.20916	-0.0341835	-1.63861	1.74955	0.372101	-0.388835
0.120349	-0.779952	-0.0341835	0.35297	-0.552585	-0.620168	-0.611485
1.57657	1.54231	-0.0341835	0.553956	-0.229479	0.620168	-0.00894281
0.0541569	0.0371406	-0.0341835	2.58208	-1.80462	-1.1163	-0.656412
0.0402667	-0.128644	-0.0185662	0.13448	-0.244861	0.266026	-3.50331
0.0541569	-1.46803	1.27199	-0.450971	1.2245	1.61244	2.95158
1.57657	0.0371406	-0.0737645	0.0971706	-0.229479	-1.36437	-0.677554
1.57657	-1.46803	-0.0341835	-0.341343	-0.229479	-0.620168	-0.602897
1.57657	0.0371406	1.23241	0.00581363	1.2245	-0.868235	-0.638573
1.57657	1.54231	-0.0341835	0.553956	-0.229479	1.61244	2.70911
0.0541569	1.54231	-1.77574	0.535684	-1.92579	0.620168	-0.133812
0.0541569	0.166155	-0.0341835	0.0971706	-0.148702	-0.124034	-0.520972
0.0541569	0.166155	-0.0341835	0.0971706	-0.148702	-0.372101	-0.573166
0.0541569	1.54231	-1.77574	0.535684	-1.92579	-0.372101	-0.586379
-1.73302	0.0371406	-0.0737645	0.0971706	-0.229479	-0.620168	-0.618092
0.0541569	-0.0918741	1.39073	1.85123	-0.148702	-1.36437	-0.66434
0.0369579	0.163605	-0.0194683	0.0580951	-0.265402	0.329533	-3.51935
0.0541569	-1.46803	1.27199	-0.450971	1.2245	0.868235	0.238813
0.0541569	-1.46803	-1.77574	-2.05885	-0.229479	0.620168	-0.218379
-1.73302	0.0371406	1.23241	0.00581363	1.2245	-1.36437	-0.677554
0.0664817	-0.180703	-0.0309125	-0.0393946	-0.320264	-0.131839	-3.50566
0.0541569	-1.46803	-1.77574	-2.05885	-0.229479	1.1163	0.970189
1.57657	-1.46803	-0.0341835	-0.341343	-0.229479	0.868235	0.384163

## Sheet: Test
xt_0	xt_1	xt_2	xt_3	xt_4	xt_5	yt
1.57657	0.0371406	-0.0737645	0.0971706	-0.229479	0.372101	-0.299643
0.0541569	-0.0058643	1.23241	0.024085	1.30528	0.372101	-0.350516
1.57657	0.0371406	-0.0737645	0.0971706	-0.229479	1.36437	1.82511
0.0541569	-1.46803	-1.77574	-2.05885	-0.229479	1.61244	3.43057
0.0541569	1.54231	-1.77574	0.535684	-1.92579	0.372101	-0.297
0.0541569	0.166155	-0.0341835	0.0971706	-0.148702	0.124034	-0.444993
-0.0120349	0.897239	-0.0341835	-0.1769	0.457122	0.868235	0.109319
0.0541569	0.166155	-0.0341835	0.0971706	-0.148702	-1.36437	-0.675572
-1.73302	-1.46803	-0.0341835	-0.341343	-0.229479	0.124034	-0.449618
0.0541569	-1.46803	-1.77574	-2.05885	-0.229479	-0.372101	-0.598932
-1.73302	1.54231	-0.0341835	0.553956	-0.229479	-0.372101	-0.571184
-1.73302	0.0371406	-0.0737645	0.0971706	-0.229479	0.868235	0.146318
-0.0120349	0.424185	-1.69658	0.0423564	-1.80462	1.61244	2.63379
-1.73302	0.0371406	-0.0737645	0.0971706	-0.229479	-1.61244	-0.688785
-1.73302	0.0371406	-0.0737645	0.0971706	-0.229479	-1.36437	-0.681518
-1.73302	1.54231	-0.0341835	0.553956	-0.229479	-0.124034	-0.505776
0.0541569	-1.46803	-0.113345	-0.469243	-0.189091	-0.124034	-0.542774
0.0541569	1.54231	1.23241	0.426056	1.2245	0.124034	-0.398746
0.120349	-0.779952	-0.0341835	0.35297	-0.552585	0.124034	-0.465475
-0.0120349	0.897239	-0.0341835	-0.1769	0.457122	-1.1163	-0.651126
1.57657	0.0371406	-0.0737645	0.0971706	-0.229479	0.868235	0.292989
0.0541569	-0.0918741	1.39073	1.85123	-0.148702	-0.620168	-0.589683
1.57657	1.54231	-0.0341835	0.553956	-0.229479	-1.61244	-0.691428
0.0541569	1.54231	1.23241	0.426056	1.2245	-1.61244	-0.692749
0.0541569	0.0371406	-0.0341835	2.58208	-1.80462	0.620168	-0.148347
-1.73302	0.0371406	1.23241	0.00581363	1.2245	-1.61244	-0.688125
1.57657	1.54231	-0.0341835	0.553956	-0.229479	-0.124034	-0.472081
-1.73302	0.0371406	1.23241	0.00581363	1.2245	0.124034	-0.439047
0.0541569	0.0371406	-0.0341835	2.58208	-1.80462	-1.61244	-0.687464
-0.0120349	0.166155	-1.77574	-1.74824	-0.229479	-1.36437	-0.676232
0.0541569	-1.46803	-0.113345	-0.469243	-0.189091	-0.868235	-0.643198

## Sheet: Results
0.376892	0.216697	1.19394
